# Supplementary material for: Capacity prediction of K-ion batteries: a machine learning based approach for high throughput screening of electrode materials
Source: Royal Society of Chemistry journal article supplement (doi:10.1039/d2ma00746k), 2022-01-01
Supplement: d2ma00746k1.pdf [file d2ma00746k1.pdf]

## Supplementary Information

### Capacity prediction of K-ion batteries: A machine learning based approach for high throughput screening of electrode materials

Souvik Manna<sup>†</sup>, Diptendu Roy<sup>†</sup>, Sandeep Das<sup>†</sup>, and Biswarup Pathak<sup>†\*</sup>

<sup>†</sup>Department of Chemistry, Indian Institute of Technology (IIT) Indore, Simrol, Indore 453552, India

\*Email: biswarup@iiti.ac.in

Text S1. Method of calculating volume of void.

Table S1. Selected descriptors and their feature importance value.

Figure S1. Selection of descriptors based on feature importance where  $f_i$  is the descriptors having feature importance greater than zero and 'i' varies from 1 to 71.

Table S2. Elemental properties to generate feature vectors.

Figure S2. Joint plots for the distribution plot across electronic properties. Change of capacity with (a) s valence electrons, (b) d valence electrons, and (c) f valence electrons.

Figure S3. Distribution of capacity with respect to different lattice parameters of electrode materials. Change in capacity with lattice parameter (a) a, (b) b, (c) c, (d)  $\gamma$ .

Figure S4. Change of explained variance with each principal component.

Figure S5. Comparison between ML predicted capacity and DFT calculated capacity for EXR ML model having number of trees=800, min\_samples\_leaf=3, min\_samples\_split=2 hyperparameters on (a) Li dataset. (b) Na+K dataset. (c) Li+Na+K dataset.

Text S2. Best hyperparameters found for random forest regression (RFR).

Figure S6. Estimation of optimized number of trees for Random Forest ML model.

Table S3. Cross Validation Score for Random Forest Regression (Number of Trees = 470)..

Table S4. Optimized hyperparameters and mean absolute percentage error (MAPE) for Decision Trees Regression.

Figure S7. Gradual insertion of K ions in electrode material,  $Mn_4NiO_8$  (a)  $K_0Mn_4NiO_8$ , (b)  $K_1Mn_4NiO_8$ , (c)  $K_2Mn_4NiO_8$ , (d)  $K_3Mn_4NiO_8$ .

Table S5. The calculated binding energy per K insertion for different concentration of K in  $Mn_4NiO_8$ .

Figure S8. DFT optimized structures of  $Mn_4NiO_8$  upon intercalation by four K ions. Here a and b represent two possibilities.

Figure S9. Root mean square displacement (RMSD) of  $Mn_4NiO_8$  structure upon intercalation of K-ions with respect to the unintercalated structure.

Table S6. Predicted capacity and number of K ion intercalated per formula unit.

Text S1. Method of calculating volume of void.

The volume of void ( $V_{void}$ ) can be calculated as

$$V_{void} = V_{crystal} - \left( \sum_{i=1}^n x_i \frac{4}{3} \pi r_i^3 \right)$$

Where,  $V_{crystal}$  is the volume of the lattice,  $i$  stands for the constituent elements in the lattice,  $x_i$  stands for the number of atoms of the constituent element  $i$ ,  $r_i$  stands for atomic radius of the constituent elements.

Table S1. Selected descriptors and their feature importance value.

| <b>Descriptors</b>                         | <b>Feature Importance</b> |
|--------------------------------------------|---------------------------|
| a                                          | 19.99248                  |
| b                                          | 11.55686                  |
| c                                          | 13.3455                   |
| $\gamma$                                   | 2.19725                   |
| molecular_wt                               | 8.629337                  |
| component_length                           | 9.97639                   |
| vol_of_void                                | 17.547                    |
| heat_atom                                  | 13.29175                  |
| mean_en                                    | 10.01011                  |
| s_contribution                             | 17.09857                  |
| f_contribution                             | 4.325726                  |
| sum_Metal                                  | 6.588943                  |
| sum_Metalliod                              | 0.453182                  |
| sum_Miracle_Radius_[pm]                    | 4.00879                   |
| sum_metallic_valence                       | 3.955712                  |
| sum_valence_d                              | 3.022948                  |
| sum_valence_f                              | 0.884731                  |
| sum_polarizability(A <sup>3</sup> )        | 4.702479                  |
| sum_specific_heat_(J/g_K)                  | 0.344263                  |
| sum_heat_of_fusion_(kJ/mol)                | 2.49474                   |
| sum_thermal_conductivity_(W/(m_K))         | 1.620195                  |
| avg_Period                                 | 29.04425                  |
| avg_families                               | 11.49841                  |
| avg_Mendeleev_Number                       | 0.084387                  |
| avg_Miracle_Radius_[pm]                    | 7.843378                  |
| avg_Zunger_radii_sum                       | 15.35589                  |
| avg_crystal_radius                         | 6.590407                  |
| avg_Pauling_Electronegativity              | 0.236832                  |
| avg_number_of_valence_electrons            | 23.95504                  |
| avg_valence_s                              | 9.665605                  |
| avg_valence_d                              | 14.02499                  |
| avg_valence_f                              | 2.490361                  |
| avg_Number_of_unfilled_s_valence_electrons | 0.483429                  |
| avg_Number_of_unfilled_d_valence_electrons | 0.531795                  |
| avg_Number_of_unfilled_f_valence_electrons | 0.100956                  |

|                                              |          |
|----------------------------------------------|----------|
| avg_Melting_point_(K)                        | 2.981298 |
| avg_heat_of_fusion_(kJ/mol)                  | 3.01323  |
| var_Atomic_Number                            | 0.141424 |
| var_Period                                   | 20.82763 |
| var_group                                    | 17.65423 |
| var_Metal                                    | 1.141666 |
| var_l_quantum_number                         | 10.8045  |
| var_crystal_radius                           | 3.774943 |
| var_MB_electronegativity                     | 2.089889 |
| var_Gordy_electronegativity                  | 12.28455 |
| var_Mulliken_EN                              | 6.442979 |
| var_Allred-Rockow_electronegativity          | 39.92961 |
| var_gilmor_number_of_valence_electron        | 4.017691 |
| var_valence_p                                | 7.147776 |
| var_valence_f                                | 3.392137 |
| var_Number_of_unfilled_p_valence_electrons   | 0.023094 |
| var_Number_of_unfilled_f_valence_electrons   | 0.001354 |
| var_outer_shell_electrons                    | 1.653657 |
| var_1st_ionization_potential_(kJ/mol)        | 8.24177  |
| var_heat_of_vaporization_(kJ/mol)_           | 1.528509 |
| range_families                               | 5.688928 |
| range_Metal                                  | 5.261452 |
| range_Atomic_Radius                          | 7.83484  |
| range_Miracle_Radius_[pm]                    | 2.830836 |
| range_ionic_radius                           | 5.195103 |
| range_MB_electronegativity                   | 7.568182 |
| range_Gordy_electronegativity                | 14.441   |
| range_metallic_valence                       | 2.962051 |
| range_number_of_valence_electrons            | 4.307665 |
| range_valence_d                              | 11.85172 |
| range_Number_of_unfilled_d_valence_electrons | 0.005627 |
| range_1st_ionization_potential_(kJ/mol)      | 12.98413 |
| range_specific_heat_(J/g_K)                  | 2.445781 |
| range_heat_of_fusion_(kJ/mol)                | 7.748805 |
| range_thermal_conductivity_(W/(m_K))         | 0.747173 |
| range_Cohesive_energy                        | 0.180748 |

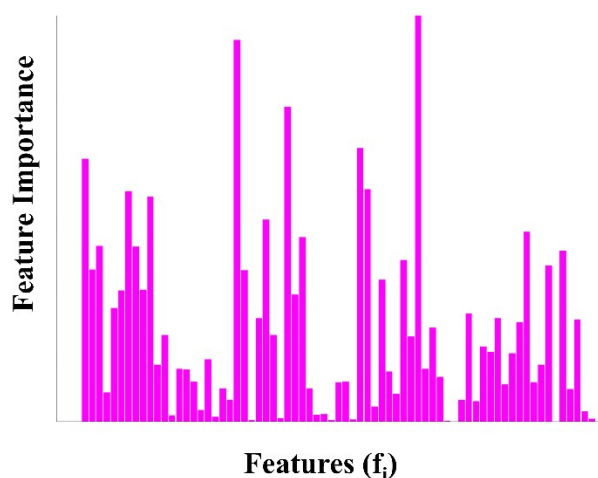

Figure S1. Selection of descriptors based on feature importance where  $f_i$  is the descriptors having feature importance greater than zero and 'i' varies from 1 to 71.

Table S2. Elemental properties to generate feature vectors.

|               |                  |                                 |                             |                                        |                      |
|---------------|------------------|---------------------------------|-----------------------------|----------------------------------------|----------------------|
| Atomic number | Metalloid        | Ionic radius                    | Metallic valence            | Number of unfilled s valence electrons | Melting point        |
| Atomic weight | Mendeleev number | Crystal radius                  | Number of valence electrons | Number of unfilled p valence electrons | Boiling point        |
| Period        | L quantum number | Pauling electronegativity       | Heat of atomization         | Number of unfilled d valence electrons | Density              |
| Group         | Atomic radius    | MB electronegativity            | Valence s                   | Number of unfilled f valence electrons | Specific heat        |
| Families      | Miracle radius   | Gordy electronegativity         | Valence p                   | Cohesive energy                        | Heat of fusion       |
| Metal         | Covalent radius  | Mulliken electronegativity      | Valence d                   | 1 <sup>st</sup> ionization potential   | Heat of vaporization |
| Non-metal     | Zunger radius    | Allred Rochow electronegativity | Valence f                   | Polarizability                         | Thermal conductivity |

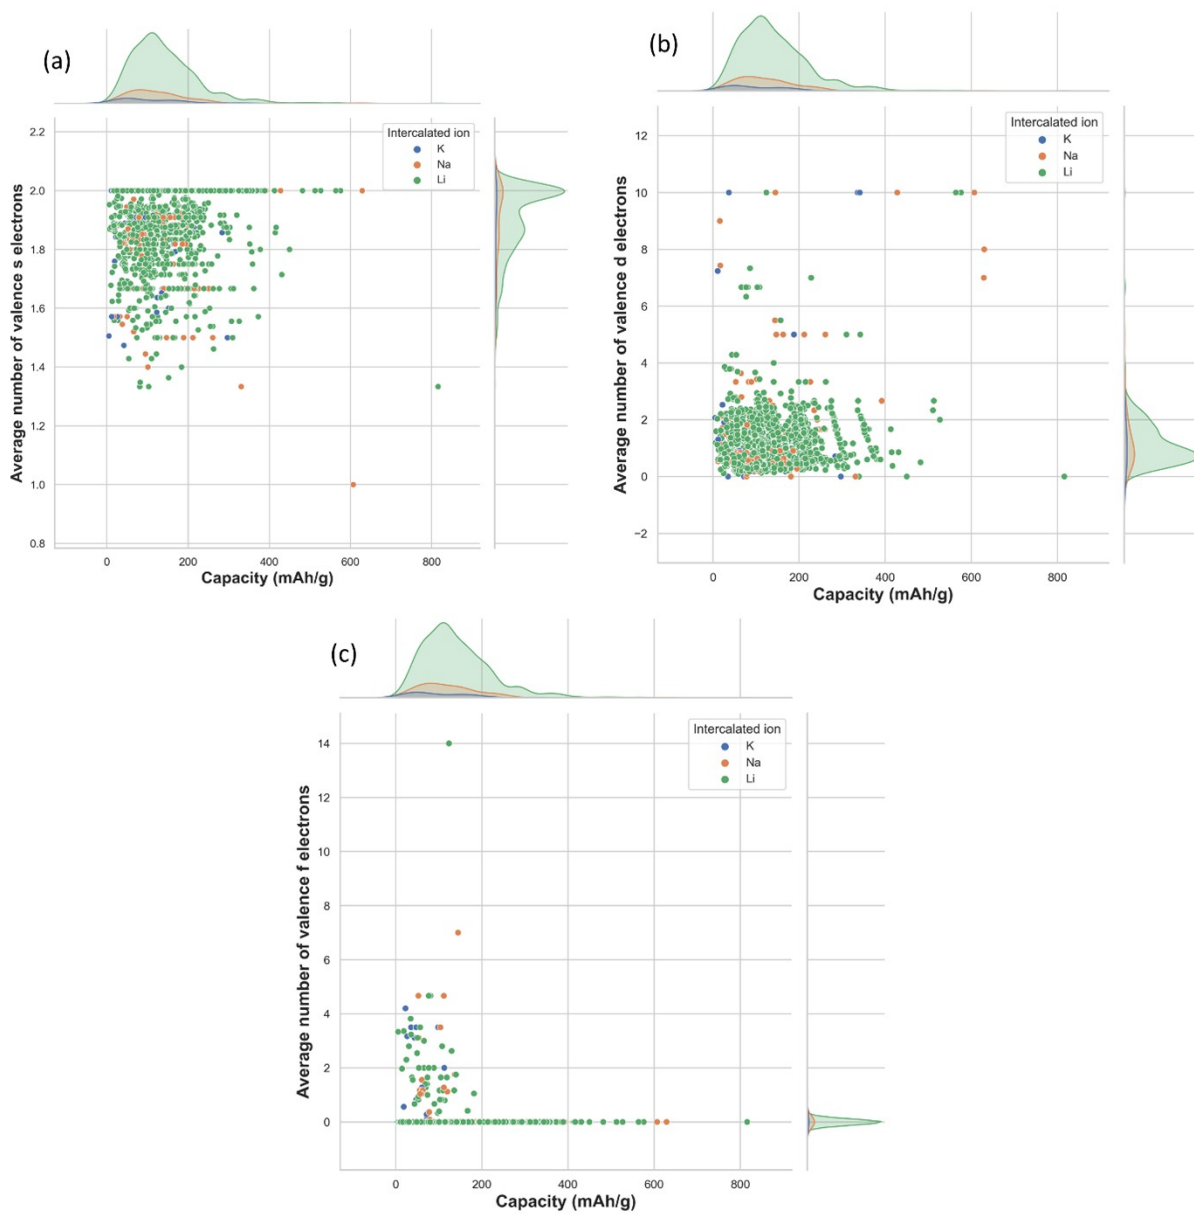

Figure S2. Joint plots for the distribution plot across electronic properties. Change of capacity with (a) s valence electrons, (b) d valence electrons, and (c) f valence electrons.

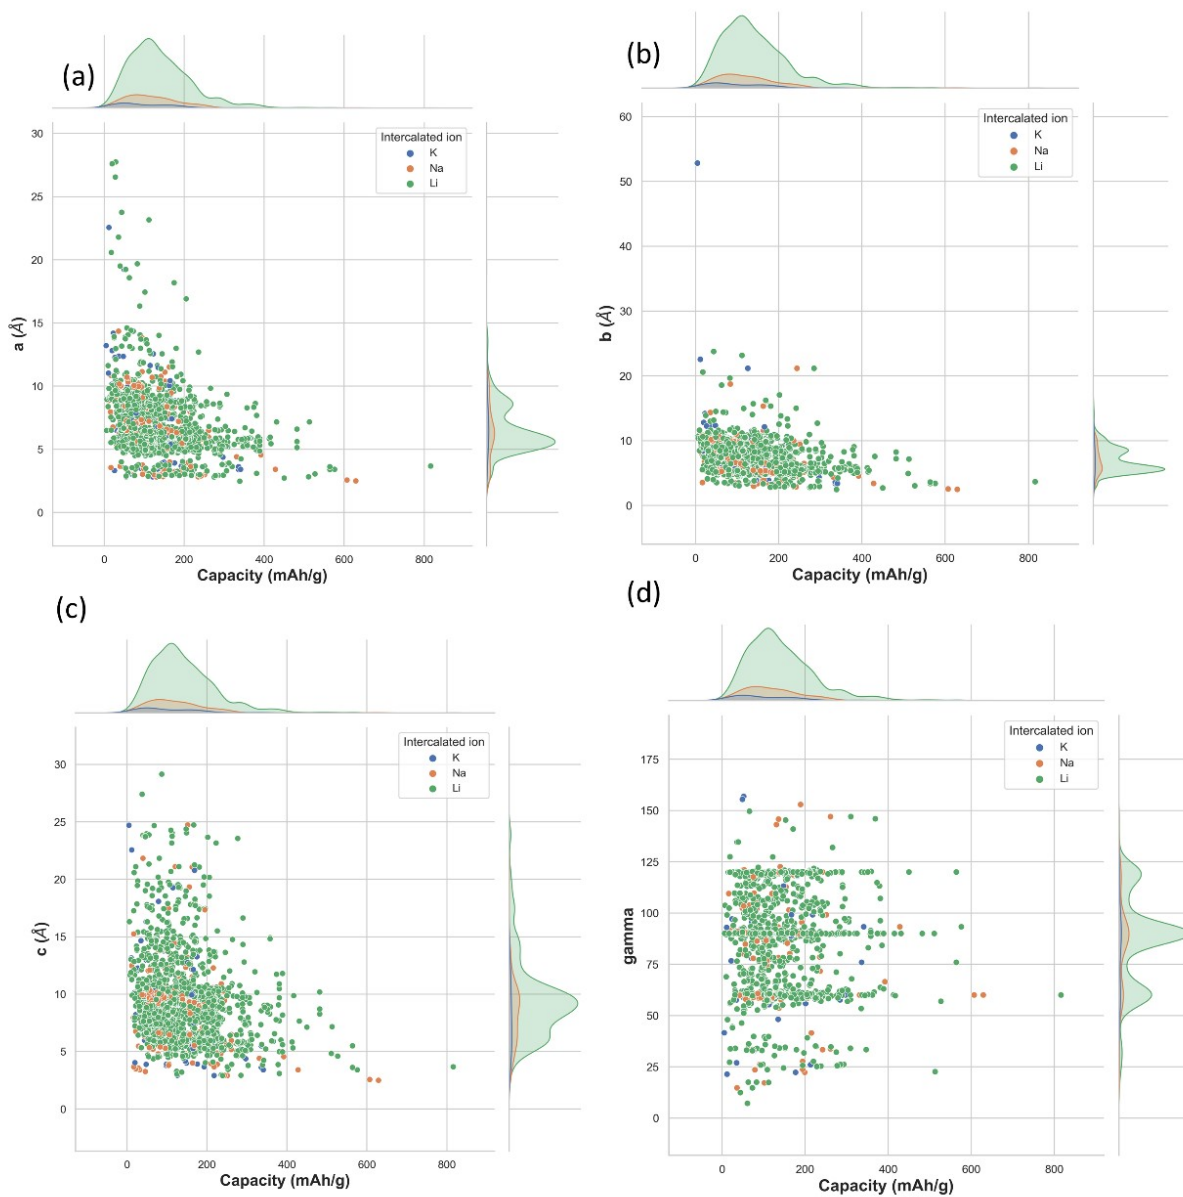

Figure S3. Distribution of capacity with respect to different lattice parameters of electrode materials. Change in capacity with lattice parameter (a) a, (b) b, (c) c, (d)  $\gamma$ .

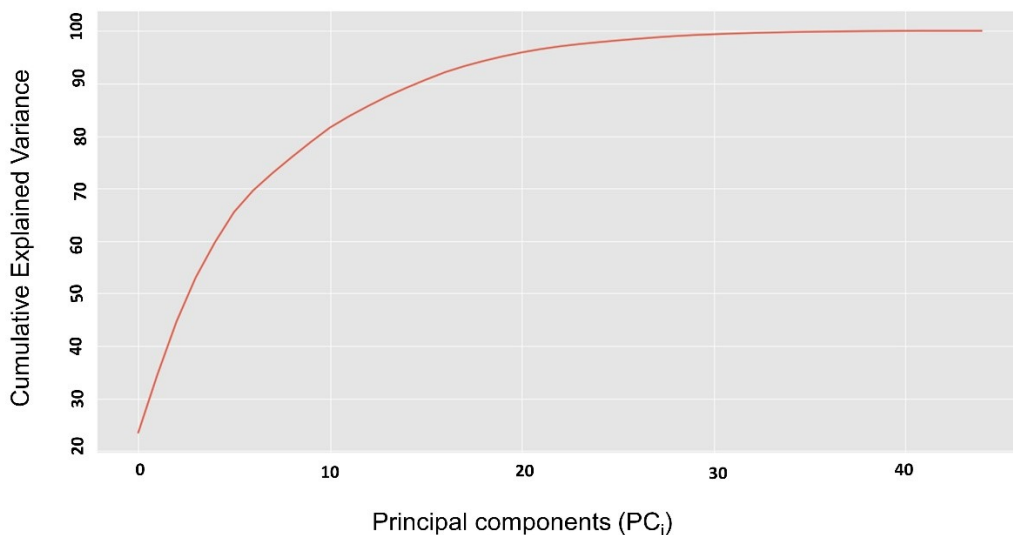

Figure S4. Change of explained variance with each principal component.

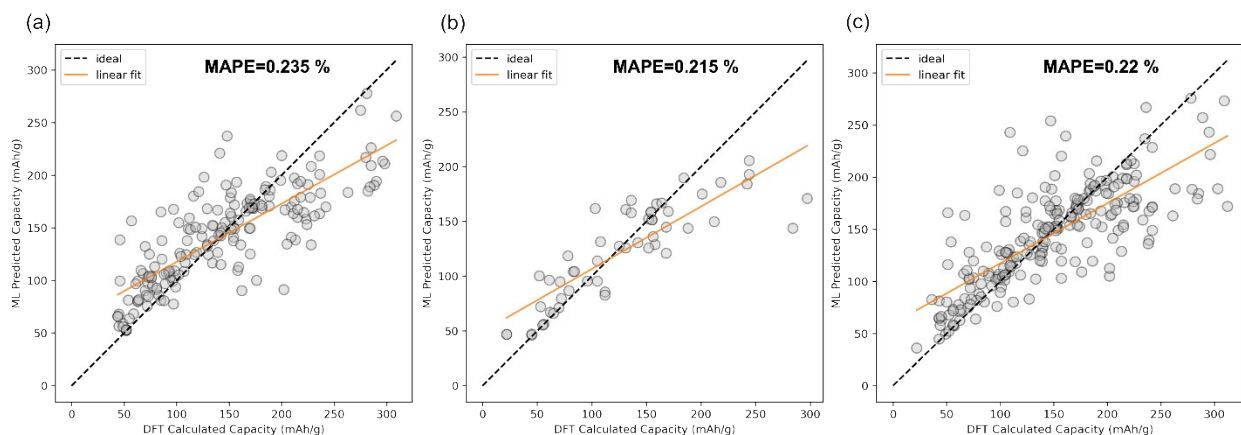

Figure S5. Comparison between ML predicted capacity and DFT calculated capacity for EXR ML model having number of trees=800, min\_samples\_leaf=3, min\_samples\_split=2 hyperparameters on (a) Li dataset. (b) Na+K dataset. (c) Li+Na+K dataset.

Text S2. Best hyperparameters found for Random Forest Regression (RFR).

The performance of RFR, an ensemble based ML algorithm has been checked for our dataset. The optimized number of trees needed for the fitting of training set has been found to be 470.



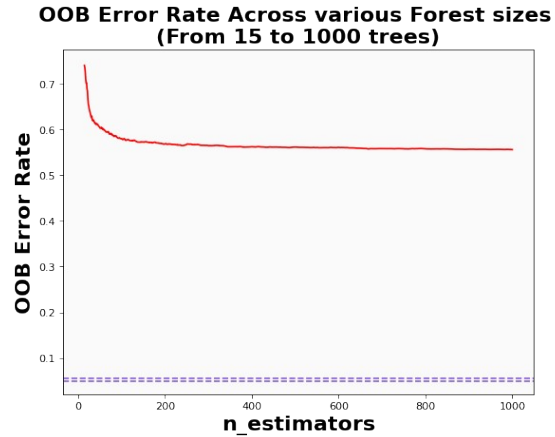

Figure S6. Estimation of optimized number of trees for Random Forest ML model.

Table S3. Cross validation score for Random Forest Regression (Number of Trees = 470).

| <b>Number of CV fold</b> | <b>MAPE</b>    |
|--------------------------|----------------|
| 1                        | 0.55632393     |
| 2                        | 0.36491104     |
| 3                        | 0.48444393     |
| 4                        | 0.38227109     |
| 5                        | 0.37742942     |
| 6                        | 0.30495874     |
| 7                        | 0.23020601     |
| 8                        | 0.45309557     |
| 9                        | 0.30685957     |
| 10                       | 0.46659858     |
| <b>Mean MAPE</b>         | <b>0.39271</b> |

Table S4. Optimized hyperparameters and mean absolute percentage error (MAPE) for Decision Trees Regression.

| <b>Max_depth</b> | <b>Min_samples_leaf</b> | <b>Min_samples_split</b> | <b>splitter</b> | <b>MAPE</b> |
|------------------|-------------------------|--------------------------|-----------------|-------------|
| 17               | 3                       | 2                        | Random          | 0.38575     |

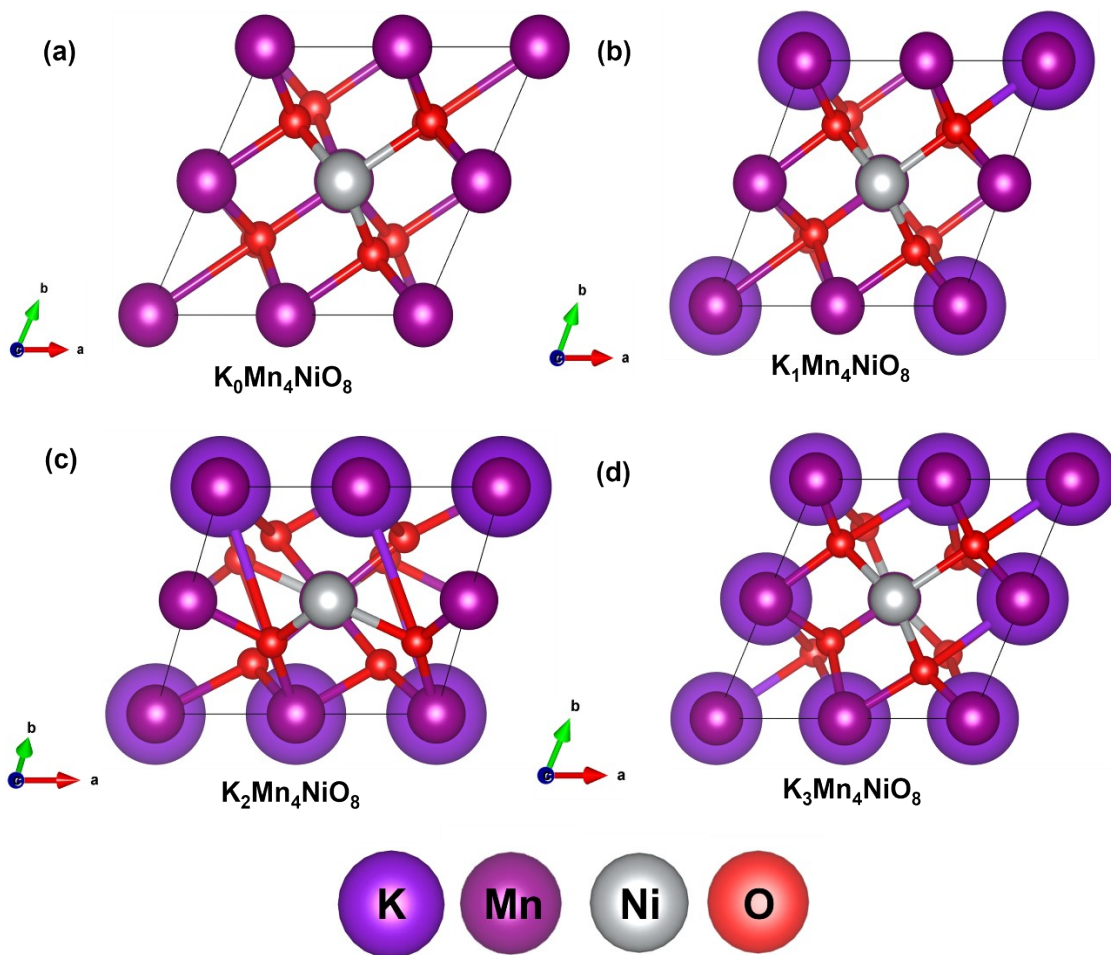

Figure S7. Gradual insertion of K ions in electrode material,  $\text{Mn}_4\text{NiO}_8$  (a)  $\text{K}_0\text{Mn}_4\text{NiO}_8$ , (b)  $\text{K}_1\text{Mn}_4\text{NiO}_8$ , (c)  $\text{K}_2\text{Mn}_4\text{NiO}_8$ , (d)  $\text{K}_3\text{Mn}_4\text{NiO}_8$ .

Table S5. The calculated binding energy per K insertion for different concentration of K in  $\text{Mn}_4\text{NiO}_8$ .

| Electrode with K insertion          | Binding Energy/K insertion (eV) |
|-------------------------------------|---------------------------------|
| $\text{K}_1\text{Mn}_4\text{NiO}_8$ | -1.83                           |
| $\text{K}_2\text{Mn}_4\text{NiO}_8$ | -3.15                           |
| $\text{K}_3\text{Mn}_4\text{NiO}_8$ | -1.97                           |

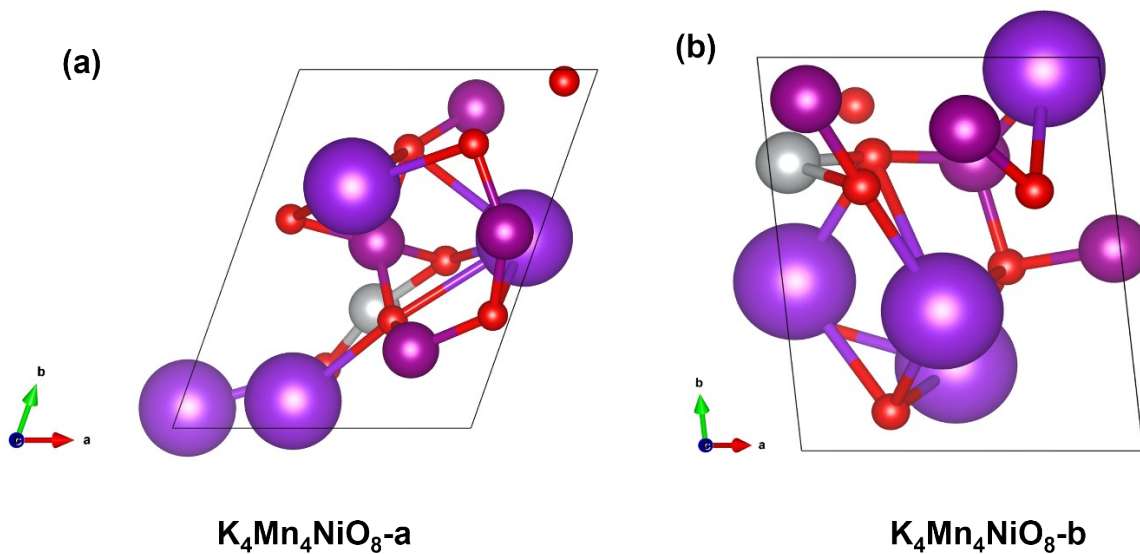

Figure S8. DFT optimized structures of  $Mn_4NiO_8$  upon intercalation by four K ions. Here a and b represent two possibilities.

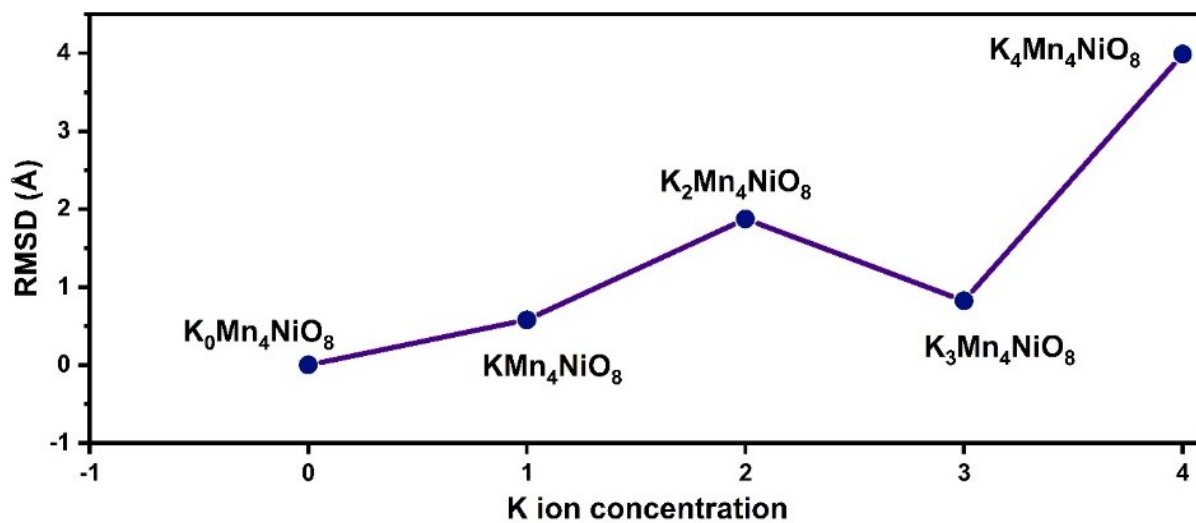

Figure S9. Root mean square displacement (RMSD) of  $Mn_4NiO_8$  structure upon intercalation of K-ions with respect to the unintercalated structure.

Table S6. Predicted capacity and number of K ion intercalated per formula unit.

| <b>Electrode materials</b>                                                      | <b>Intercalated electrode materials</b> | <b>No. of K ion intercalated</b> | <b>Capacity (mAh/g)</b>                                                                           |
|---------------------------------------------------------------------------------|-----------------------------------------|----------------------------------|---------------------------------------------------------------------------------------------------|
| Al <sub>2</sub> Cu                                                              | 0.72                                    | K <sub>0.72</sub>                | K <sub>0.72</sub> Al <sub>2</sub> Cu                                                              |
| Al <sub>3</sub> Cr <sub>3</sub> (SbO <sub>8</sub> ) <sub>2</sub>                | 3.99                                    | K <sub>3.99</sub>                | K <sub>3.99</sub> Al <sub>3</sub> Cr <sub>3</sub> (SbO <sub>8</sub> ) <sub>2</sub>                |
| Ba <sub>2</sub> (CuO <sub>2</sub> ) <sub>3</sub>                                | 1.5                                     | K <sub>1.5</sub>                 | K <sub>1.5</sub> Ba <sub>2</sub> (CuO <sub>2</sub> ) <sub>3</sub>                                 |
| Ba <sub>2</sub> Ti <sub>11</sub> O <sub>24</sub>                                | 1.92                                    | K <sub>1.92</sub>                | K <sub>1.92</sub> Ba <sub>2</sub> Ti <sub>11</sub> O <sub>24</sub>                                |
| Ba <sub>2</sub> VP <sub>2</sub> O <sub>9</sub>                                  | 1.27                                    | K <sub>1.27</sub>                | K <sub>1.27</sub> Ba <sub>2</sub> VP <sub>2</sub> O <sub>9</sub>                                  |
| Ba <sub>4</sub> Li <sub>4</sub> Ti <sub>19</sub> O <sub>44</sub>                | 4.26                                    | K <sub>4.26</sub>                | K <sub>4.26</sub> Ba <sub>4</sub> Li <sub>4</sub> Ti <sub>19</sub> O <sub>44</sub>                |
| Ba <sub>4</sub> Nb <sub>3</sub> O <sub>12</sub>                                 | 2.42                                    | K <sub>2.42</sub>                | K <sub>2.42</sub> Ba <sub>4</sub> Nb <sub>3</sub> O <sub>12</sub>                                 |
| Ba <sub>6</sub> Ta <sub>9</sub> Ti <sub>7</sub> O <sub>42</sub>                 | 1.98                                    | K <sub>1.98</sub>                | K <sub>1.98</sub> Ba <sub>6</sub> Ta <sub>9</sub> Ti <sub>7</sub> O <sub>42</sub>                 |
| Ba <sub>6</sub> Ti <sub>7</sub> (Sb <sub>3</sub> O <sub>14</sub> ) <sub>3</sub> | 3.75                                    | K <sub>3.75</sub>                | K <sub>3.75</sub> Ba <sub>6</sub> Ti <sub>7</sub> (Sb <sub>3</sub> O <sub>14</sub> ) <sub>3</sub> |
| Ba <sub>6</sub> Ti <sub>7</sub> Nb <sub>9</sub> O <sub>42</sub>                 | 4.07                                    | K <sub>4.07</sub>                | K <sub>4.07</sub> Ba <sub>6</sub> Ti <sub>7</sub> Nb <sub>9</sub> O <sub>42</sub>                 |
| BaCaVP <sub>2</sub> O <sub>9</sub>                                              | 1.66                                    | K <sub>1.66</sub>                | K <sub>1.66</sub> BaCaVP <sub>2</sub> O <sub>9</sub>                                              |
| BaNaSn                                                                          | 0.97                                    | K <sub>0.97</sub>                | K <sub>0.97</sub> BaNaSn                                                                          |
| Bi                                                                              | 0.12                                    | K <sub>0.12</sub>                | K <sub>0.12</sub> Bi                                                                              |
| Bi(PdO <sub>2</sub> ) <sub>2</sub>                                              | 1.42                                    | K <sub>1.42</sub>                | K <sub>1.42</sub> Bi(PdO <sub>2</sub> ) <sub>2</sub>                                              |
| Bi(PO <sub>3</sub> ) <sub>4</sub>                                               | 1.12                                    | K <sub>1.12</sub>                | K <sub>1.12</sub> Bi(PO <sub>3</sub> ) <sub>4</sub>                                               |
| Bi <sub>2</sub> (SO <sub>4</sub> ) <sub>3</sub>                                 | 1.73                                    | K <sub>1.73</sub>                | K <sub>1.73</sub> Bi <sub>2</sub> (SO <sub>4</sub> ) <sub>3</sub>                                 |
| Bi <sub>3</sub> (PO <sub>5</sub> ) <sub>2</sub>                                 | 2.15                                    | K <sub>2.15</sub>                | K <sub>2.15</sub> Bi <sub>3</sub> (PO <sub>5</sub> ) <sub>2</sub>                                 |
| BiO <sub>2</sub>                                                                | 0.47                                    | K <sub>0.47</sub>                | K <sub>0.47</sub> BiO <sub>2</sub>                                                                |
| BiP <sub>2</sub> O <sub>7</sub>                                                 | 1.02                                    | K <sub>1.02</sub>                | K <sub>1.02</sub> BiP <sub>2</sub> O <sub>7</sub>                                                 |

|                                                                  |      |       |                                                                       |
|------------------------------------------------------------------|------|-------|-----------------------------------------------------------------------|
| C                                                                | 0.03 | K0.03 | K0.03C                                                                |
| Ca <sub>9</sub> Co(PO <sub>4</sub> ) <sub>7</sub>                | 2.08 | K2.08 | K2.08Ca <sub>9</sub> Co(PO <sub>4</sub> ) <sub>7</sub>                |
| CaFe <sub>2</sub> (SiO <sub>3</sub> ) <sub>4</sub>               | 1.99 | K1.99 | K1.99CaFe <sub>2</sub> (SiO <sub>3</sub> ) <sub>4</sub>               |
| Co                                                               | 0.14 | K0.14 | K0.14Co                                                               |
| Co(NiO <sub>2</sub> ) <sub>4</sub>                               | 2.93 | K2.93 | K2.93Co(NiO <sub>2</sub> ) <sub>4</sub>                               |
| Co(PO <sub>3</sub> ) <sub>3</sub>                                | 2.27 | K2.27 | K2.27Co(PO <sub>3</sub> ) <sub>3</sub>                                |
| Co <sub>15</sub> O <sub>28</sub>                                 | 1.99 | K1.99 | K1.99Co <sub>15</sub> O <sub>28</sub>                                 |
| Co <sub>2</sub> (CO <sub>3</sub> ) <sub>3</sub>                  | 1.77 | K1.77 | K1.77Co <sub>2</sub> (CO <sub>3</sub> ) <sub>3</sub>                  |
| Co <sub>2</sub> (PO <sub>3</sub> ) <sub>5</sub>                  | 2.44 | K2.44 | K2.44Co <sub>2</sub> (PO <sub>3</sub> ) <sub>5</sub>                  |
| Co <sub>2</sub> (SO <sub>4</sub> ) <sub>3</sub>                  | 2.12 | K2.12 | K2.12Co <sub>2</sub> (SO <sub>4</sub> ) <sub>3</sub>                  |
| Co <sub>21</sub> O <sub>40</sub>                                 | 1.58 | K1.58 | K1.58Co <sub>21</sub> O <sub>40</sub>                                 |
| Co <sub>2</sub> C <sub>2</sub> O <sub>7</sub>                    | 1.28 | K1.28 | K1.28Co <sub>2</sub> C <sub>2</sub> O <sub>7</sub>                    |
| Co <sub>2</sub> NiO <sub>6</sub>                                 | 2.1  | K2.1  | K2.1Co <sub>2</sub> NiO <sub>6</sub>                                  |
| Co <sub>2</sub> P <sub>3</sub> O <sub>10</sub>                   | 1.89 | K1.89 | K1.89Co <sub>2</sub> P <sub>3</sub> O <sub>10</sub>                   |
| Co <sub>2</sub> P <sub>5</sub> O <sub>16</sub>                   | 2.83 | K2.83 | K2.83Co <sub>2</sub> P <sub>5</sub> O <sub>16</sub>                   |
| Co <sub>3</sub> (P <sub>2</sub> O <sub>7</sub> ) <sub>2</sub>    | 2.96 | K2.96 | K2.96Co <sub>3</sub> (P <sub>2</sub> O <sub>7</sub> ) <sub>2</sub>    |
| Co <sub>3</sub> (SeO <sub>3</sub> ) <sub>4</sub>                 | 3.18 | K3.18 | K3.18Co <sub>3</sub> (SeO <sub>3</sub> ) <sub>4</sub>                 |
| Co <sub>3</sub> BiO <sub>8</sub>                                 | 2.06 | K2.06 | K2.06Co <sub>3</sub> BiO <sub>8</sub>                                 |
| Co <sub>3</sub> Cu <sub>3</sub> (TeO <sub>8</sub> ) <sub>2</sub> | 4.07 | K4.07 | K4.07Co <sub>3</sub> Cu <sub>3</sub> (TeO <sub>8</sub> ) <sub>2</sub> |
| Co <sub>3</sub> Ni(PO <sub>4</sub> ) <sub>4</sub>                | 3.93 | K3.93 | K3.93Co <sub>3</sub> Ni(PO <sub>4</sub> ) <sub>4</sub>                |
| Co <sub>3</sub> Ni <sub>3</sub> (TeO <sub>8</sub> ) <sub>2</sub> | 5.44 | K5.44 | K5.44Co <sub>3</sub> Ni <sub>3</sub> (TeO <sub>8</sub> ) <sub>2</sub> |
| Co <sub>3</sub> NiO <sub>8</sub>                                 | 2.56 | K2.56 | K2.56Co <sub>3</sub> NiO <sub>8</sub>                                 |
| Co <sub>3</sub> P <sub>3</sub> O <sub>11</sub>                   | 1.68 | K1.68 | K1.68Co <sub>3</sub> P <sub>3</sub> O <sub>11</sub>                   |
| Co <sub>3</sub> P <sub>4</sub> O <sub>15</sub>                   | 2.14 | K2.14 | K2.14Co <sub>3</sub> P <sub>4</sub> O <sub>15</sub>                   |

|             |      |       |                  |
|-------------|------|-------|------------------|
| Co3SbO8     | 2.21 | K2.21 | K2.21Co3SbO8     |
| Co3Sn(PO4)4 | 3.84 | K3.84 | K3.84Co3Sn(PO4)4 |
| Co3SnO8     | 2.35 | K2.35 | K2.35Co3SnO8     |
| Co3TeO8     | 2.57 | K2.57 | K2.57Co3TeO8     |
| Co4NiO8     | 3.03 | K3.03 | K3.03Co4NiO8     |
| Co4TeO8     | 2.31 | K2.31 | K2.31Co4TeO8     |
| Co5(P2O7)4  | 4.8  | K4.8  | K4.8Co5(P2O7)4   |
| Co5NiO12    | 4.09 | K4.09 | K4.09Co5NiO12    |
| Co5SbO12    | 4    | K4    | K4Co5SbO12       |
| Co5Te3O16   | 4.76 | K4.76 | K4.76Co5Te3O16   |
| Co6P7O24    | 2.72 | K2.72 | K2.72Co6P7O24    |
| Co7O12      | 2.52 | K2.52 | K2.52Co7O12      |
| CoBO3       | 0.77 | K0.77 | K0.77CoBO3       |
| CoCu(PO4)2  | 2.27 | K2.27 | K2.27CoCu(PO4)2  |
| CoF3        | 0.61 | K0.61 | K0.61CoF3        |
| CoH8(CO5)2  | 1.69 | K1.69 | K1.69CoH8(CO5)2  |
| CoNi(PO4)2  | 2.3  | K2.3  | K2.3CoNi(PO4)2   |
| CoO2        | 0.72 | K0.72 | K0.72CoO2        |
| CoP2O7      | 1.43 | K1.43 | K1.43CoP2O7      |
| CoPHO5      | 1.41 | K1.41 | K1.41CoPHO5      |
| CoPO4       | 0.93 | K0.93 | K0.93CoPO4       |
| CoS2        | 0.94 | K0.94 | K0.94CoS2        |
| CoSbO4      | 1.37 | K1.37 | K1.37CoSbO4      |
| CoSiO4      | 0.97 | K0.97 | K0.97CoSiO4      |

|                                                                  |      |       |                                                                       |
|------------------------------------------------------------------|------|-------|-----------------------------------------------------------------------|
| CoSn(PO <sub>4</sub> ) <sub>2</sub>                              | 1.87 | K1.87 | K1.87CoSn(PO <sub>4</sub> ) <sub>2</sub>                              |
| Cr(CoO <sub>3</sub> ) <sub>2</sub>                               | 1.41 | K1.41 | K1.41Cr(CoO <sub>3</sub> ) <sub>2</sub>                               |
| Cr(GeO <sub>3</sub> ) <sub>2</sub>                               | 1.58 | K1.58 | K1.58Cr(GeO <sub>3</sub> ) <sub>2</sub>                               |
| Cr(PO <sub>3</sub> ) <sub>4</sub>                                | 1.73 | K1.73 | K1.73Cr(PO <sub>3</sub> ) <sub>4</sub>                                |
| Cr(SiO <sub>3</sub> ) <sub>2</sub>                               | 1.21 | K1.21 | K1.21Cr(SiO <sub>3</sub> ) <sub>2</sub>                               |
| Cr(SO <sub>4</sub> ) <sub>2</sub>                                | 1.12 | K1.12 | K1.12Cr(SO <sub>4</sub> ) <sub>2</sub>                                |
| Cr(WO <sub>4</sub> ) <sub>3</sub>                                | 2.92 | K2.92 | K2.92Cr(WO <sub>4</sub> ) <sub>3</sub>                                |
| Cr <sub>10</sub> Fe <sub>5</sub> O <sub>24</sub>                 | 4.07 | K4.07 | K4.07Cr <sub>10</sub> Fe <sub>5</sub> O <sub>24</sub>                 |
| Cr <sub>2</sub> (PO <sub>4</sub> ) <sub>3</sub>                  | 1.56 | K1.56 | K1.56Cr <sub>2</sub> (PO <sub>4</sub> ) <sub>3</sub>                  |
| Cr <sub>2</sub> (PS <sub>4</sub> ) <sub>3</sub>                  | 1.22 | K1.22 | K1.22Cr <sub>2</sub> (PS <sub>4</sub> ) <sub>3</sub>                  |
| Cr <sub>2</sub> (PS <sub>4</sub> ) <sub>3</sub>                  | 1.22 | K1.22 | K1.22Cr <sub>2</sub> (PS <sub>4</sub> ) <sub>3</sub>                  |
| Cr <sub>2</sub> (SO <sub>4</sub> ) <sub>3</sub>                  | 1.81 | K1.81 | K1.81Cr <sub>2</sub> (SO <sub>4</sub> ) <sub>3</sub>                  |
| Cr <sub>2</sub> P <sub>2</sub> O <sub>9</sub>                    | 1.49 | K1.49 | K1.49Cr <sub>2</sub> P <sub>2</sub> O <sub>9</sub>                    |
| Cr <sub>2</sub> P <sub>3</sub> O <sub>10</sub>                   | 1.69 | K1.69 | K1.69Cr <sub>2</sub> P <sub>3</sub> O <sub>10</sub>                   |
| Cr <sub>3</sub> (CuO <sub>6</sub> ) <sub>2</sub>                 | 2.08 | K2.08 | K2.08Cr <sub>3</sub> (CuO <sub>6</sub> ) <sub>2</sub>                 |
| Cr <sub>3</sub> (FeO <sub>4</sub> ) <sub>2</sub>                 | 2.05 | K2.05 | K2.05Cr <sub>3</sub> (FeO <sub>4</sub> ) <sub>2</sub>                 |
| Cr <sub>3</sub> (FeO <sub>6</sub> ) <sub>2</sub>                 | 1.79 | K1.79 | K1.79Cr <sub>3</sub> (FeO <sub>6</sub> ) <sub>2</sub>                 |
| Cr <sub>3</sub> (P <sub>2</sub> O <sub>7</sub> ) <sub>2</sub>    | 2.21 | K2.21 | K2.21Cr <sub>3</sub> (P <sub>2</sub> O <sub>7</sub> ) <sub>2</sub>    |
| Cr <sub>3</sub> Co(PO <sub>4</sub> ) <sub>4</sub>                | 3.29 | K3.29 | K3.29Cr <sub>3</sub> Co(PO <sub>4</sub> ) <sub>4</sub>                |
| Cr <sub>3</sub> Co <sub>3</sub> (SbO <sub>8</sub> ) <sub>2</sub> | 4.35 | K4.35 | K4.35Cr <sub>3</sub> Co <sub>3</sub> (SbO <sub>8</sub> ) <sub>2</sub> |
| Cr <sub>3</sub> Co <sub>3</sub> (TeO <sub>8</sub> ) <sub>2</sub> | 4.3  | K4.3  | K4.3Cr <sub>3</sub> Co <sub>3</sub> (TeO <sub>8</sub> ) <sub>2</sub>  |
| Cr <sub>3</sub> Cu(PO <sub>4</sub> ) <sub>4</sub>                | 3.18 | K3.18 | K3.18Cr <sub>3</sub> Cu(PO <sub>4</sub> ) <sub>4</sub>                |
| Cr <sub>3</sub> Fe <sub>2</sub> Sb <sub>3</sub> O <sub>16</sub>  | 5    | K5    | K5Cr <sub>3</sub> Fe <sub>2</sub> Sb <sub>3</sub> O <sub>16</sub>     |
| Cr <sub>3</sub> Fe <sub>3</sub> (TeO <sub>8</sub> ) <sub>2</sub> | 4.9  | K4.9  | K4.9Cr <sub>3</sub> Fe <sub>3</sub> (TeO <sub>8</sub> ) <sub>2</sub>  |

|               |      |       |                    |
|---------------|------|-------|--------------------|
| Cr3Ni(PO4)4   | 3.39 | K3.39 | K3.39Cr3Ni(PO4)4   |
| Cr3Ni(SO4)6   | 3.31 | K3.31 | K3.31Cr3Ni(SO4)6   |
| Cr3O8         | 1.26 | K1.26 | K1.26Cr3O8         |
| Cr3P4O15      | 1.85 | K1.85 | K1.85Cr3P4O15      |
| Cr3P6WO24     | 2.85 | K2.85 | K2.85Cr3P6WO24     |
| Cr3SbO8       | 2.02 | K2.02 | K2.02Cr3SbO8       |
| Cr3Sn3(SbO8)2 | 4.56 | K4.56 | K4.56Cr3Sn3(SbO8)2 |
| Cr3TeO8       | 2    | K2    | K2Cr3TeO8          |
| Cr3WO8        | 1.82 | K1.82 | K1.82Cr3WO8        |
| Cr4(PO4)3     | 1.52 | K1.52 | K1.52Cr4(PO4)3     |
| Cr4GaS8       | 2.54 | K2.54 | K2.54Cr4GaS8       |
| Cr4P7O24      | 2.57 | K2.57 | K2.57Cr4P7O24      |
| Cr4Si4O13     | 2.42 | K2.42 | K2.42Cr4Si4O13     |
| Cr5(PO4)4     | 2.04 | K2.04 | K2.04Cr5(PO4)4     |
| Cr5(Si2O7)2   | 2.49 | K2.49 | K2.49Cr5(Si2O7)2   |
| Cr5O12        | 1.22 | K1.22 | K1.22Cr5O12        |
| Cr6P7O24      | 2.41 | K2.41 | K2.41Cr6P7O24      |
| CrCo(PO4)2    | 1.94 | K1.94 | K1.94CrCo(PO4)2    |
| CrCo3(PO4)4   | 3.82 | K3.82 | K3.82CrCo3(PO4)4   |
| CrCo3O8       | 2.17 | K2.17 | K2.17CrCo3O8       |
| CrCo5O12      | 2.93 | K2.93 | K2.93CrCo5O12      |
| CrCu(PO4)2    | 1.89 | K1.89 | K1.89CrCu(PO4)2    |
| CrF3          | 0.58 | K0.58 | K0.58CrF3          |
| CrF4          | 0.71 | K0.71 | K0.71CrF4          |



|                |      |       |                     |
|----------------|------|-------|---------------------|
| CrF6           | 1.01 | K1.01 | K1.01CrF6           |
| CrFe(PO4)2     | 1.92 | K1.92 | K1.92CrFe(PO4)2     |
| CrFe3Cu2(PO4)6 | 4.21 | K4.21 | K4.21CrFe3Cu2(PO4)6 |
| CrN2           | 0.67 | K0.67 | K0.67CrN2           |
| CrNi(PO4)2     | 2.04 | K2.04 | K2.04CrNi(PO4)2     |
| CrO2           | 0.51 | K0.51 | K0.51CrO2           |
| CrO3           | 0.68 | K0.68 | K0.68CrO3           |
| CrP2O7         | 1.22 | K1.22 | K1.22CrP2O7         |
| CrP2S7         | 1.71 | K1.71 | K1.71CrP2S7         |
| CrPHO5         | 1.43 | K1.43 | K1.43CrPHO5         |
| CrPO4          | 0.65 | K0.65 | K0.65CrPO4          |
| CrPO4F         | 1.27 | K1.27 | K1.27CrPO4F         |
| CrPO5          | 0.97 | K0.97 | K0.97CrPO5          |
| CrS2           | 0.62 | K0.62 | K0.62CrS2           |
| CrS2           | 0.62 | K0.62 | K0.62CrS2           |
| CrSn(PO4)2     | 1.7  | K1.7  | K1.7CrSn(PO4)2      |
| CrTe(WO6)2     | 2.94 | K2.94 | K2.94CrTe(WO6)2     |
| Cs2CoF6        | 1.49 | K1.49 | K1.49Cs2CoF6        |
| Cs2CrF6        | 1.79 | K1.79 | K1.79Cs2CrF6        |
| Cs2CuF6        | 1.53 | K1.53 | K1.53Cs2CuF6        |
| Cs2MnF6        | 1.43 | K1.43 | K1.43Cs2MnF6        |
| Cs2MnO4        | 1.23 | K1.23 | K1.23Cs2MnO4        |
| Cs2MoBr6       | 2.87 | K2.87 | K2.87Cs2MoBr6       |
| Cs2MoCl6       | 1.84 | K1.84 | K1.84Cs2MoCl6       |

|                                                                |      |       |                                                                     |
|----------------------------------------------------------------|------|-------|---------------------------------------------------------------------|
| Cs <sub>2</sub> NiF <sub>6</sub>                               | 1.44 | K1.44 | K1.44Cs <sub>2</sub> NiF <sub>6</sub>                               |
| Cs <sub>2</sub> SbBr <sub>6</sub>                              | 2.68 | K2.68 | K2.68Cs <sub>2</sub> SbBr <sub>6</sub>                              |
| Cs <sub>2</sub> SbCl <sub>6</sub>                              | 1.89 | K1.89 | K1.89Cs <sub>2</sub> SbCl <sub>6</sub>                              |
| Cu                                                             | 0.06 | K0.06 | K0.06Cu                                                             |
| Cu(PO <sub>3</sub> ) <sub>3</sub>                              | 1.55 | K1.55 | K1.55Cu(PO <sub>3</sub> ) <sub>3</sub>                              |
| Cu(TeO <sub>3</sub> ) <sub>4</sub>                             | 4.27 | K4.27 | K4.27Cu(TeO <sub>3</sub> ) <sub>4</sub>                             |
| Cu <sub>2</sub> P <sub>3</sub> O <sub>10</sub>                 | 2.05 | K2.05 | K2.05Cu <sub>2</sub> P <sub>3</sub> O <sub>10</sub>                 |
| Cu <sub>3</sub> (P <sub>2</sub> O <sub>7</sub> ) <sub>2</sub>  | 2.27 | K2.27 | K2.27Cu <sub>3</sub> (P <sub>2</sub> O <sub>7</sub> ) <sub>2</sub>  |
| Cu <sub>3</sub> O <sub>4</sub>                                 | 1.33 | K1.33 | K1.33Cu <sub>3</sub> O <sub>4</sub>                                 |
| Cu <sub>3</sub> Sb(PO <sub>4</sub> ) <sub>4</sub>              | 3.43 | K3.43 | K3.43Cu <sub>3</sub> Sb(PO <sub>4</sub> ) <sub>4</sub>              |
| Cu <sub>4</sub> (PO <sub>4</sub> ) <sub>3</sub>                | 2.07 | K2.07 | K2.07Cu <sub>4</sub> (PO <sub>4</sub> ) <sub>3</sub>                |
| Cu <sub>5</sub> (Si <sub>2</sub> O <sub>7</sub> ) <sub>2</sub> | 2.33 | K2.33 | K2.33Cu <sub>5</sub> (Si <sub>2</sub> O <sub>7</sub> ) <sub>2</sub> |
| Cu <sub>5</sub> P <sub>3</sub> O <sub>13</sub>                 | 2.25 | K2.25 | K2.25Cu <sub>5</sub> P <sub>3</sub> O <sub>13</sub>                 |
| Cu <sub>9</sub> (PO <sub>4</sub> ) <sub>8</sub>                | 2.17 | K2.17 | K2.17Cu <sub>9</sub> (PO <sub>4</sub> ) <sub>8</sub>                |
| CuCO <sub>3</sub>                                              | 0.71 | K0.71 | K0.71CuCO <sub>3</sub>                                              |
| CuHCO <sub>4</sub>                                             | 0.79 | K0.79 | K0.79CuHCO <sub>4</sub>                                             |
| CuO                                                            | 0.65 | K0.65 | K0.65CuO                                                            |
| CuP <sub>4</sub> O <sub>11</sub>                               | 1.69 | K1.69 | K1.69CuP <sub>4</sub> O <sub>11</sub>                               |
| CuPO <sub>4</sub>                                              | 0.97 | K0.97 | K0.97CuPO <sub>4</sub>                                              |
| CuS <sub>2</sub>                                               | 0.73 | K0.73 | K0.73CuS <sub>2</sub>                                               |
| CuSb(PO <sub>4</sub> ) <sub>2</sub>                            | 2.42 | K2.42 | K2.42CuSb(PO <sub>4</sub> ) <sub>2</sub>                            |
| CuSe                                                           | 0.76 | K0.76 | K0.76CuSe                                                           |
| Fe(CoO <sub>3</sub> ) <sub>2</sub>                             | 2.52 | K2.52 | K2.52Fe(CoO <sub>3</sub> ) <sub>2</sub>                             |
| Fe(PO <sub>3</sub> ) <sub>3</sub>                              | 2.25 | K2.25 | K2.25Fe(PO <sub>3</sub> ) <sub>3</sub>                              |

|                                                                  |      |       |                                                                       |
|------------------------------------------------------------------|------|-------|-----------------------------------------------------------------------|
| Fe(PO <sub>3</sub> ) <sub>4</sub>                                | 1.72 | K1.72 | K1.72Fe(PO <sub>3</sub> ) <sub>4</sub>                                |
| Fe(PS <sub>3</sub> ) <sub>2</sub>                                | 2.04 | K2.04 | K2.04Fe(PS <sub>3</sub> ) <sub>2</sub>                                |
| Fe(SbO <sub>3</sub> ) <sub>4</sub>                               | 3.57 | K3.57 | K3.57Fe(SbO <sub>3</sub> ) <sub>4</sub>                               |
| Fe <sub>2</sub> (CO <sub>3</sub> ) <sub>3</sub>                  | 1.72 | K1.72 | K1.72Fe <sub>2</sub> (CO <sub>3</sub> ) <sub>3</sub>                  |
| Fe <sub>2</sub> (PO <sub>4</sub> ) <sub>3</sub>                  | 1.66 | K1.66 | K1.66Fe <sub>2</sub> (PO <sub>4</sub> ) <sub>3</sub>                  |
| Fe <sub>2</sub> (SO <sub>4</sub> ) <sub>3</sub>                  | 1.93 | K1.93 | K1.93Fe <sub>2</sub> (SO <sub>4</sub> ) <sub>3</sub>                  |
| Fe <sub>2</sub> C <sub>2</sub> O <sub>7</sub>                    | 1.38 | K1.38 | K1.38Fe <sub>2</sub> C <sub>2</sub> O <sub>7</sub>                    |
| Fe <sub>2</sub> Co <sub>3</sub> O <sub>10</sub>                  | 2.74 | K2.74 | K2.74Fe <sub>2</sub> Co <sub>3</sub> O <sub>10</sub>                  |
| Fe <sub>2</sub> Ni(PO <sub>4</sub> ) <sub>3</sub>                | 2.22 | K2.22 | K2.22Fe <sub>2</sub> Ni(PO <sub>4</sub> ) <sub>3</sub>                |
| Fe <sub>2</sub> OF <sub>3</sub>                                  | 0.78 | K0.78 | K0.78Fe <sub>2</sub> OF <sub>3</sub>                                  |
| Fe <sub>2</sub> P <sub>3</sub> O <sub>10</sub>                   | 2.12 | K2.12 | K2.12Fe <sub>2</sub> P <sub>3</sub> O <sub>10</sub>                   |
| Fe <sub>2</sub> P <sub>5</sub> O <sub>16</sub>                   | 2.85 | K2.85 | K2.85Fe <sub>2</sub> P <sub>5</sub> O <sub>16</sub>                   |
| Fe <sub>3</sub> (P <sub>2</sub> O <sub>7</sub> ) <sub>2</sub>    | 2.3  | K2.3  | K2.3Fe <sub>3</sub> (P <sub>2</sub> O <sub>7</sub> ) <sub>2</sub>     |
| Fe <sub>3</sub> (P <sub>3</sub> O <sub>10</sub> ) <sub>2</sub>   | 1.99 | K1.99 | K1.99Fe <sub>3</sub> (P <sub>3</sub> O <sub>10</sub> ) <sub>2</sub>   |
| Fe <sub>3</sub> (SiO <sub>4</sub> ) <sub>2</sub>                 | 1.78 | K1.78 | K1.78Fe <sub>3</sub> (SiO <sub>4</sub> ) <sub>2</sub>                 |
| Fe <sub>3</sub> (SnS <sub>4</sub> ) <sub>2</sub>                 | 2.69 | K2.69 | K2.69Fe <sub>3</sub> (SnS <sub>4</sub> ) <sub>2</sub>                 |
| Fe <sub>3</sub> Co(PO <sub>4</sub> ) <sub>4</sub>                | 3.97 | K3.97 | K3.97Fe <sub>3</sub> Co(PO <sub>4</sub> ) <sub>4</sub>                |
| Fe <sub>3</sub> Co <sub>3</sub> (SbO <sub>8</sub> ) <sub>2</sub> | 5.77 | K5.77 | K5.77Fe <sub>3</sub> Co <sub>3</sub> (SbO <sub>8</sub> ) <sub>2</sub> |
| Fe <sub>3</sub> Co <sub>3</sub> (TeO <sub>8</sub> ) <sub>2</sub> | 5.27 | K5.27 | K5.27Fe <sub>3</sub> Co <sub>3</sub> (TeO <sub>8</sub> ) <sub>2</sub> |
| Fe <sub>3</sub> Cu(PO <sub>4</sub> ) <sub>4</sub>                | 3.17 | K3.17 | K3.17Fe <sub>3</sub> Cu(PO <sub>4</sub> ) <sub>4</sub>                |
| Fe <sub>3</sub> Ni(PO <sub>4</sub> ) <sub>4</sub>                | 3.89 | K3.89 | K3.89Fe <sub>3</sub> Ni(PO <sub>4</sub> ) <sub>4</sub>                |
| Fe <sub>3</sub> O <sub>4</sub>                                   | 1.1  | K1.1  | K1.1Fe <sub>3</sub> O <sub>4</sub>                                    |
| Fe <sub>3</sub> OF <sub>5</sub>                                  | 1.03 | K1.03 | K1.03Fe <sub>3</sub> OF <sub>5</sub>                                  |
| Fe <sub>3</sub> OF <sub>7</sub>                                  | 1.42 | K1.42 | K1.42Fe <sub>3</sub> OF <sub>7</sub>                                  |

|             |      |       |                  |
|-------------|------|-------|------------------|
| Fe3P3O11    | 1.45 | K1.45 | K1.45Fe3P3O11    |
| Fe3P3O13    | 2.47 | K2.47 | K2.47Fe3P3O13    |
| Fe3P4O15    | 1.97 | K1.97 | K1.97Fe3P4O15    |
| Fe4(PO4)3   | 1.98 | K1.98 | K1.98Fe4(PO4)3   |
| Fe4OF7      | 1.13 | K1.13 | K1.13Fe4OF7      |
| Fe4OF8      | 1.36 | K1.36 | K1.36Fe4OF8      |
| Fe5(P2O7)4  | 2.86 | K2.86 | K2.86Fe5(P2O7)4  |
| Fe5(PO4)4   | 2.69 | K2.69 | K2.69Fe5(PO4)4   |
| Fe5Co3O16   | 4.3  | K4.3  | K4.3Fe5Co3O16    |
| Fe5Ni(PO4)6 | 4.19 | K4.19 | K4.19Fe5Ni(PO4)6 |
| Fe5O8       | 0.94 | K0.94 | K0.94Fe5O8       |
| Fe5OF11     | 2.13 | K2.13 | K2.13Fe5OF11     |
| Fe5P3O13    | 2.63 | K2.63 | K2.63Fe5P3O13    |
| Fe5P6WO24   | 3.08 | K3.08 | K3.08Fe5P6WO24   |
| Fe5Sb(PO4)6 | 3.72 | K3.72 | K3.72Fe5Sb(PO4)6 |
| Fe7(OF3)3   | 2.01 | K2.01 | K2.01Fe7(OF3)3   |
| Fe7(OF7)2   | 2.93 | K2.93 | K2.93Fe7(OF7)2   |
| Fe7(PO4)8   | 3.84 | K3.84 | K3.84Fe7(PO4)8   |
| Fe7O3F13    | 2.83 | K2.83 | K2.83Fe7O3F13    |
| Fe7O7F      | 1.61 | K1.61 | K1.61Fe7O7F      |
| FeCl4       | 1.39 | K1.39 | K1.39FeCl4       |
| FeClO       | 0.55 | K0.55 | K0.55FeClO       |
| FeCo3(PO4)4 | 4.02 | K4.02 | K4.02FeCo3(PO4)4 |
| FeCo3O8     | 2.36 | K2.36 | K2.36FeCo3O8     |

|             |      |       |                  |
|-------------|------|-------|------------------|
| FeCo5O12    | 3.33 | K3.33 | K3.33FeCo5O12    |
| FeCo9O20    | 4.8  | K4.8  | K4.8FeCo9O20     |
| FeCoO4      | 1.5  | K1.5  | K1.5FeCoO4       |
| FeCSO7      | 1.82 | K1.82 | K1.82FeCSO7      |
| FeCu(PO4)2  | 2.19 | K2.19 | K2.19FeCu(PO4)2  |
| FeCuS2      | 0.92 | K0.92 | K0.92FeCuS2      |
| FeF3        | 0.53 | K0.53 | K0.53FeF3        |
| FeH12(SO7)2 | 1.86 | K1.86 | K1.86FeH12(SO7)2 |
| FeH4(SO5)2  | 2.27 | K2.27 | K2.27FeH4(SO5)2  |
| FeNi(PO4)2  | 2.31 | K2.31 | K2.31FeNi(PO4)2  |
| FeNi3(PO4)4 | 3.98 | K3.98 | K3.98FeNi3(PO4)4 |
| FeO2        | 0.62 | K0.62 | K0.62FeO2        |
| FeP2O7      | 1.42 | K1.42 | K1.42FeP2O7      |
| FePHO5      | 1.47 | K1.47 | K1.47FePHO5      |
| FePO4       | 1.09 | K1.09 | K1.09FePO4       |
| FePO4       | 1.04 | K1.04 | K1.04FePO4       |
| FePO4       | 0.64 | K0.64 | K0.64FePO4       |
| FePO4       | 1.01 | K1.01 | K1.01FePO4       |
| FePO4       | 0.93 | K0.93 | K0.93FePO4       |
| FeS2        | 0.93 | K0.93 | K0.93FeS2        |
| FeSb3       | 1.13 | K1.13 | K1.13FeSb3       |
| FeWClO4     | 1.13 | K1.13 | K1.13FeWClO4     |
| Ge3(MoO6)2  | 2.24 | K2.24 | K2.24Ge3(MoO6)2  |
| In2CuSe4    | 2.5  | K2.5  | K2.5In2CuSe4     |

|                                                               |      |       |                                                                    |
|---------------------------------------------------------------|------|-------|--------------------------------------------------------------------|
| InBi                                                          | 0.97 | K0.97 | K0.97InBi                                                          |
| K(Mo <sub>2</sub> O <sub>3</sub> ) <sub>4</sub>               | 4.24 | K4.24 | K4.24K(Mo <sub>2</sub> O <sub>3</sub> ) <sub>4</sub>               |
| K(MoS) <sub>9</sub>                                           | 2.38 | K2.38 | K2.38K(MoS) <sub>9</sub>                                           |
| K(WO <sub>3</sub> ) <sub>3</sub>                              | 1.78 | K1.78 | K1.78K(WO <sub>3</sub> ) <sub>3</sub>                              |
| K(WO <sub>3</sub> ) <sub>6</sub>                              | 2.5  | K2.5  | K2.5K(WO <sub>3</sub> ) <sub>6</sub>                               |
| K <sub>11</sub> Mn <sub>4</sub> O <sub>16</sub>               | 4.26 | K4.26 | K4.26K <sub>11</sub> Mn <sub>4</sub> O <sub>16</sub>               |
| K <sub>2</sub> CoF <sub>6</sub>                               | 1.18 | K1.18 | K1.18K <sub>2</sub> CoF <sub>6</sub>                               |
| K <sub>2</sub> CrF <sub>6</sub>                               | 1.55 | K1.55 | K1.55K <sub>2</sub> CrF <sub>6</sub>                               |
| K <sub>2</sub> CrO <sub>4</sub>                               | 1.21 | K1.21 | K1.21K <sub>2</sub> CrO <sub>4</sub>                               |
| K <sub>2</sub> CuPCO <sub>7</sub>                             | 1.32 | K1.32 | K1.32K <sub>2</sub> CuPCO <sub>7</sub>                             |
| K <sub>2</sub> Li <sub>2</sub> CoO <sub>4</sub>               | 1.11 | K1.11 | K1.11K <sub>2</sub> Li <sub>2</sub> CoO <sub>4</sub>               |
| K <sub>2</sub> Li <sub>2</sub> NiO <sub>4</sub>               | 1.1  | K1.1  | K1.1K <sub>2</sub> Li <sub>2</sub> NiO <sub>4</sub>                |
| K <sub>2</sub> LiMn <sub>2</sub> O <sub>4</sub>               | 1.46 | K1.46 | K1.46K <sub>2</sub> LiMn <sub>2</sub> O <sub>4</sub>               |
| K <sub>2</sub> MnF <sub>6</sub>                               | 1.22 | K1.22 | K1.22K <sub>2</sub> MnF <sub>6</sub>                               |
| K <sub>2</sub> MnPCO <sub>7</sub>                             | 1.4  | K1.4  | K1.4K <sub>2</sub> MnPCO <sub>7</sub>                              |
| K <sub>2</sub> MoCl <sub>6</sub>                              | 1.64 | K1.64 | K1.64K <sub>2</sub> MoCl <sub>6</sub>                              |
| K <sub>2</sub> NiPCO <sub>7</sub>                             | 1.4  | K1.4  | K1.4K <sub>2</sub> NiPCO <sub>7</sub>                              |
| K <sub>2</sub> SnPCO <sub>7</sub>                             | 1.45 | K1.45 | K1.45K <sub>2</sub> SnPCO <sub>7</sub>                             |
| K <sub>2</sub> Ti <sub>8</sub> O <sub>17</sub>                | 3.03 | K3.03 | K3.03K <sub>2</sub> Ti <sub>8</sub> O <sub>17</sub>                |
| K <sub>2</sub> TiPCO <sub>7</sub>                             | 1.28 | K1.28 | K1.28K <sub>2</sub> TiPCO <sub>7</sub>                             |
| K <sub>2</sub> VPO <sub>6</sub>                               | 1.05 | K1.05 | K1.05K <sub>2</sub> VPO <sub>6</sub>                               |
| K <sub>3</sub> (FeSe) <sub>8</sub>                            | 2.18 | K2.18 | K2.18K <sub>3</sub> (FeSe) <sub>8</sub>                            |
| K <sub>4</sub> Co <sub>2</sub> O <sub>5</sub>                 | 1.69 | K1.69 | K1.69K <sub>4</sub> Co <sub>2</sub> O <sub>5</sub>                 |
| K <sub>4</sub> Li <sub>3</sub> Mn <sub>2</sub> O <sub>8</sub> | 2.11 | K2.11 | K2.11K <sub>4</sub> Li <sub>3</sub> Mn <sub>2</sub> O <sub>8</sub> |

|               |      |       |                    |
|---------------|------|-------|--------------------|
| K5Nb16(O5F2)4 | 1.45 | K1.45 | K1.45K5Nb16(O5F2)4 |
| K7(Mo9S11)4   | 0.45 | K0.45 | K0.45K7(Mo9S11)4   |
| KBiPCO7       | 1.74 | K1.74 | K1.74KBiPCO7       |
| KC            | 0.33 | K0.33 | K0.33KC            |
| KCrPCO7       | 1.42 | K1.42 | K1.42KCrPCO7       |
| KFe2F6        | 1.54 | K1.54 | K1.54KFe2F6        |
| KFePCO7       | 1.6  | K1.6  | K1.6KFePCO7        |
| KLiSb(PO4)2   | 1.44 | K1.44 | K1.44KLiSb(PO4)2   |
| KLiTi2(PO5)2  | 1.37 | K1.37 | K1.37KLiTi2(PO5)2  |
| KMn2O4        | 1.17 | K1.17 | K1.17KMn2O4        |
| KMnP3HO10     | 1.75 | K1.75 | K1.75KMnP3HO10     |
| KMnPCO7       | 1.75 | K1.75 | K1.75KMnPCO7       |
| KNb2O5        | 1.52 | K1.52 | K1.52KNb2O5        |
| KNb2PO8       | 1.18 | K1.18 | K1.18KNb2PO8       |
| KPrPCO7       | 1.26 | K1.26 | K1.26KPrPCO7       |
| KTi2(PO4)3    | 1.66 | K1.66 | K1.66KTi2(PO4)3    |
| KTiAsO5       | 1.15 | K1.15 | K1.15KTiAsO5       |
| KTiPCO7       | 1.36 | K1.36 | K1.36KTiPCO7       |
| KVPCO7        | 1.33 | K1.33 | K1.33KVPCO7        |
| La20Cu9O40    | 2.89 | K2.89 | K2.89La20Cu9O40    |
| La2MoO6       | 1.6  | K1.6  | K1.6La2MoO6        |
| La2Ti2CrO9    | 2.23 | K2.23 | K2.23La2Ti2CrO9    |
| La3MnO7       | 2.05 | K2.05 | K2.05La3MnO7       |
| La3Ti3CrO12   | 2.61 | K2.61 | K2.61La3Ti3CrO12   |

|                                                                                 |      |       |                                                                                      |
|---------------------------------------------------------------------------------|------|-------|--------------------------------------------------------------------------------------|
| La <sub>3</sub> Ti <sub>4</sub> O <sub>12</sub>                                 | 1.98 | K1.98 | K1.98La <sub>3</sub> Ti <sub>4</sub> O <sub>12</sub>                                 |
| La <sub>4</sub> CoO <sub>8</sub>                                                | 1.62 | K1.62 | K1.62La <sub>4</sub> CoO <sub>8</sub>                                                |
| La <sub>4</sub> FeO <sub>8</sub>                                                | 1.55 | K1.55 | K1.55La <sub>4</sub> FeO <sub>8</sub>                                                |
| La <sub>4</sub> MnO <sub>8</sub>                                                | 1.97 | K1.97 | K1.97La <sub>4</sub> MnO <sub>8</sub>                                                |
| La <sub>4</sub> NiO <sub>8</sub>                                                | 1.57 | K1.57 | K1.57La <sub>4</sub> NiO <sub>8</sub>                                                |
| La <sub>4</sub> Ti <sub>3</sub> O <sub>12</sub>                                 | 1.97 | K1.97 | K1.97La <sub>4</sub> Ti <sub>3</sub> O <sub>12</sub>                                 |
| La <sub>6</sub> Mn <sub>3</sub> O <sub>14</sub>                                 | 2.61 | K2.61 | K2.61La <sub>6</sub> Mn <sub>3</sub> O <sub>14</sub>                                 |
| La <sub>8</sub> Cu <sub>3</sub> O <sub>16</sub>                                 | 1.85 | K1.85 | K1.85La <sub>8</sub> Cu <sub>3</sub> O <sub>16</sub>                                 |
| LaTi <sub>2</sub> O <sub>6</sub>                                                | 1.25 | K1.25 | K1.25LaTi <sub>2</sub> O <sub>6</sub>                                                |
| Li(BC) <sub>2</sub>                                                             | 0.2  | K0.2  | K0.2Li(BC) <sub>2</sub>                                                              |
| Li(FeO <sub>2</sub> ) <sub>2</sub>                                              | 1.08 | K1.08 | K1.08Li(FeO <sub>2</sub> ) <sub>2</sub>                                              |
| Li(NiO <sub>2</sub> ) <sub>2</sub>                                              | 1.1  | K1.1  | K1.1Li(NiO <sub>2</sub> ) <sub>2</sub>                                               |
| Li(NiO <sub>2</sub> ) <sub>5</sub>                                              | 2.81 | K2.81 | K2.81Li(NiO <sub>2</sub> ) <sub>5</sub>                                              |
| Li(ReO <sub>3</sub> ) <sub>5</sub>                                              | 2.87 | K2.87 | K2.87Li(ReO <sub>3</sub> ) <sub>5</sub>                                              |
| Li <sub>10</sub> Cr <sub>3</sub> P <sub>6</sub> (O <sub>4</sub> F) <sub>6</sub> | 3.27 | K3.27 | K3.27Li <sub>10</sub> Cr <sub>3</sub> P <sub>6</sub> (O <sub>4</sub> F) <sub>6</sub> |
| Li <sub>11</sub> (FeO <sub>3</sub> ) <sub>4</sub>                               | 2.13 | K2.13 | K2.13Li <sub>11</sub> (FeO <sub>3</sub> ) <sub>4</sub>                               |
| Li <sub>12</sub> Nb <sub>14</sub> ZnO <sub>42</sub>                             | 2.61 | K2.61 | K2.61Li <sub>12</sub> Nb <sub>14</sub> ZnO <sub>42</sub>                             |
| Li <sub>12</sub> Ni <sub>11</sub> O <sub>28</sub>                               | 5.15 | K5.15 | K5.15Li <sub>12</sub> Ni <sub>11</sub> O <sub>28</sub>                               |
| Li <sub>13</sub> Mn <sub>8</sub> O <sub>24</sub>                                | 3.94 | K3.94 | K3.94Li <sub>13</sub> Mn <sub>8</sub> O <sub>24</sub>                                |
| Li <sub>15</sub> (FeO <sub>4</sub> ) <sub>4</sub>                               | 2.04 | K2.04 | K2.04Li <sub>15</sub> (FeO <sub>4</sub> ) <sub>4</sub>                               |
| Li <sub>17</sub> (Co <sub>4</sub> O <sub>9</sub> ) <sub>2</sub>                 | 3.3  | K3.3  | K3.3Li <sub>17</sub> (Co <sub>4</sub> O <sub>9</sub> ) <sub>2</sub>                  |
| Li <sub>19</sub> (FeAs) <sub>20</sub>                                           | 0.84 | K0.84 | K0.84Li <sub>19</sub> (FeAs) <sub>20</sub>                                           |
| Li <sub>2</sub> (FeO <sub>2</sub> ) <sub>3</sub>                                | 1.24 | K1.24 | K1.24Li <sub>2</sub> (FeO <sub>2</sub> ) <sub>3</sub>                                |
| Li <sub>2</sub> (FeO <sub>2</sub> ) <sub>5</sub>                                | 2.35 | K2.35 | K2.35Li <sub>2</sub> (FeO <sub>2</sub> ) <sub>5</sub>                                |



|                                                                               |      |       |                                                                                    |
|-------------------------------------------------------------------------------|------|-------|------------------------------------------------------------------------------------|
| Li <sub>2</sub> (NiO <sub>2</sub> ) <sub>3</sub>                              | 1.15 | K1.15 | K1.15Li <sub>2</sub> (NiO <sub>2</sub> ) <sub>3</sub>                              |
| Li <sub>2</sub> (NiO <sub>2</sub> ) <sub>3</sub>                              | 1.29 | K1.29 | K1.29Li <sub>2</sub> (NiO <sub>2</sub> ) <sub>3</sub>                              |
| Li <sub>2</sub> C                                                             | 0.1  | K0.1  | K0.1Li <sub>2</sub> C                                                              |
| Li <sub>2</sub> Co(NiO <sub>3</sub> ) <sub>2</sub>                            | 1.04 | K1.04 | K1.04Li <sub>2</sub> Co(NiO <sub>3</sub> ) <sub>2</sub>                            |
| Li <sub>2</sub> Co(PO <sub>4</sub> ) <sub>2</sub>                             | 0.91 | K0.91 | K0.91Li <sub>2</sub> Co(PO <sub>4</sub> ) <sub>2</sub>                             |
| Li <sub>2</sub> CoNi <sub>3</sub> O <sub>8</sub>                              | 1.68 | K1.68 | K1.68Li <sub>2</sub> CoNi <sub>3</sub> O <sub>8</sub>                              |
| Li <sub>2</sub> CoO <sub>3</sub>                                              | 0.98 | K0.98 | K0.98Li <sub>2</sub> CoO <sub>3</sub>                                              |
| Li <sub>2</sub> Cr(FeO <sub>3</sub> ) <sub>2</sub>                            | 1.16 | K1.16 | K1.16Li <sub>2</sub> Cr(FeO <sub>3</sub> ) <sub>2</sub>                            |
| Li <sub>2</sub> Cr(PO <sub>4</sub> ) <sub>2</sub>                             | 1.15 | K1.15 | K1.15Li <sub>2</sub> Cr(PO <sub>4</sub> ) <sub>2</sub>                             |
| Li <sub>2</sub> Cr(Si <sub>2</sub> O <sub>5</sub> ) <sub>3</sub>              | 1.97 | K1.97 | K1.97Li <sub>2</sub> Cr(Si <sub>2</sub> O <sub>5</sub> ) <sub>3</sub>              |
| Li <sub>2</sub> Cr <sub>2</sub> FeO <sub>6</sub>                              | 1.3  | K1.3  | K1.3Li <sub>2</sub> Cr <sub>2</sub> FeO <sub>6</sub>                               |
| Li <sub>2</sub> Cr <sub>2</sub> P <sub>4</sub> H <sub>3</sub> O <sub>16</sub> | 2.53 | K2.53 | K2.53Li <sub>2</sub> Cr <sub>2</sub> P <sub>4</sub> H <sub>3</sub> O <sub>16</sub> |
| Li <sub>2</sub> Cr <sub>3</sub> (CO <sub>3</sub> ) <sub>6</sub>               | 3.11 | K3.11 | K3.11Li <sub>2</sub> Cr <sub>3</sub> (CO <sub>3</sub> ) <sub>6</sub>               |
| Li <sub>2</sub> Cr <sub>3</sub> (CoO <sub>4</sub> ) <sub>3</sub>              | 3.35 | K3.35 | K3.35Li <sub>2</sub> Cr <sub>3</sub> (CoO <sub>4</sub> ) <sub>3</sub>              |
| Li <sub>2</sub> Cr <sub>3</sub> CoO <sub>8</sub>                              | 2.07 | K2.07 | K2.07Li <sub>2</sub> Cr <sub>3</sub> CoO <sub>8</sub>                              |
| Li <sub>2</sub> Cr <sub>3</sub> CoO <sub>8</sub>                              | 1.97 | K1.97 | K1.97Li <sub>2</sub> Cr <sub>3</sub> CoO <sub>8</sub>                              |
| Li <sub>2</sub> Cr <sub>3</sub> FeO <sub>8</sub>                              | 1.7  | K1.7  | K1.7Li <sub>2</sub> Cr <sub>3</sub> FeO <sub>8</sub>                               |
| Li <sub>2</sub> Cr <sub>3</sub> NiO <sub>8</sub>                              | 1.52 | K1.52 | K1.52Li <sub>2</sub> Cr <sub>3</sub> NiO <sub>8</sub>                              |
| Li <sub>2</sub> Cr <sub>3</sub> NiO <sub>8</sub>                              | 1.63 | K1.63 | K1.63Li <sub>2</sub> Cr <sub>3</sub> NiO <sub>8</sub>                              |
| Li <sub>2</sub> Cr <sub>3</sub> O <sub>6</sub>                                | 1.37 | K1.37 | K1.37Li <sub>2</sub> Cr <sub>3</sub> O <sub>6</sub>                                |
| Li <sub>2</sub> CrF <sub>6</sub>                                              | 1.38 | K1.38 | K1.38Li <sub>2</sub> CrF <sub>6</sub>                                              |
| Li <sub>2</sub> CrFe <sub>3</sub> O <sub>8</sub>                              | 1.58 | K1.58 | K1.58Li <sub>2</sub> CrFe <sub>3</sub> O <sub>8</sub>                              |
| Li <sub>2</sub> CrO <sub>4</sub>                                              | 0.83 | K0.83 | K0.83Li <sub>2</sub> CrO <sub>4</sub>                                              |
| Li <sub>2</sub> CuAsCO <sub>7</sub>                                           | 1.17 | K1.17 | K1.17Li <sub>2</sub> CuAsCO <sub>7</sub>                                           |

|                                                                               |      |       |                                                                                    |
|-------------------------------------------------------------------------------|------|-------|------------------------------------------------------------------------------------|
| Li <sub>2</sub> CuP <sub>2</sub> O <sub>7</sub>                               | 1.12 | K1.12 | K1.12Li <sub>2</sub> CuP <sub>2</sub> O <sub>7</sub>                               |
| Li <sub>2</sub> CuSbO <sub>5</sub>                                            | 1.17 | K1.17 | K1.17Li <sub>2</sub> CuSbO <sub>5</sub>                                            |
| Li <sub>2</sub> Fe(BO <sub>3</sub> ) <sub>2</sub>                             | 0.85 | K0.85 | K0.85Li <sub>2</sub> Fe(BO <sub>3</sub> ) <sub>2</sub>                             |
| Li <sub>2</sub> Fe(NiO <sub>3</sub> ) <sub>2</sub>                            | 0.89 | K0.89 | K0.89Li <sub>2</sub> Fe(NiO <sub>3</sub> ) <sub>2</sub>                            |
| Li <sub>2</sub> Fe(PO <sub>4</sub> ) <sub>2</sub>                             | 0.91 | K0.91 | K0.91Li <sub>2</sub> Fe(PO <sub>4</sub> ) <sub>2</sub>                             |
| Li <sub>2</sub> Fe(PO <sub>4</sub> ) <sub>2</sub>                             | 1.39 | K1.39 | K1.39Li <sub>2</sub> Fe(PO <sub>4</sub> ) <sub>2</sub>                             |
| Li <sub>2</sub> Fe <sub>2</sub> P <sub>4</sub> H <sub>3</sub> O <sub>16</sub> | 2.54 | K2.54 | K2.54Li <sub>2</sub> Fe <sub>2</sub> P <sub>4</sub> H <sub>3</sub> O <sub>16</sub> |
| Li <sub>2</sub> Fe <sub>3</sub> CoO <sub>8</sub>                              | 1.84 | K1.84 | K1.84Li <sub>2</sub> Fe <sub>3</sub> CoO <sub>8</sub>                              |
| Li <sub>2</sub> Fe <sub>3</sub> CuO <sub>8</sub>                              | 1.4  | K1.4  | K1.4Li <sub>2</sub> Fe <sub>3</sub> CuO <sub>8</sub>                               |
| Li <sub>2</sub> Fe <sub>3</sub> NiO <sub>8</sub>                              | 1.59 | K1.59 | K1.59Li <sub>2</sub> Fe <sub>3</sub> NiO <sub>8</sub>                              |
| Li <sub>2</sub> FeNi <sub>3</sub> O <sub>8</sub>                              | 1.8  | K1.8  | K1.8Li <sub>2</sub> FeNi <sub>3</sub> O <sub>8</sub>                               |
| Li <sub>2</sub> FeOF <sub>3</sub>                                             | 0.89 | K0.89 | K0.89Li <sub>2</sub> FeOF <sub>3</sub>                                             |
| Li <sub>2</sub> FePCO <sub>7</sub>                                            | 0.98 | K0.98 | K0.98Li <sub>2</sub> FePCO <sub>7</sub>                                            |
| Li <sub>2</sub> FePCO <sub>7</sub>                                            | 0.94 | K0.94 | K0.94Li <sub>2</sub> FePCO <sub>7</sub>                                            |
| Li <sub>2</sub> FePO <sub>5</sub>                                             | 1.05 | K1.05 | K1.05Li <sub>2</sub> FePO <sub>5</sub>                                             |
| Li <sub>2</sub> Mg <sub>11</sub> (WO <sub>4</sub> ) <sub>12</sub>             | 1.43 | K1.43 | K1.43Li <sub>2</sub> Mg <sub>11</sub> (WO <sub>4</sub> ) <sub>12</sub>             |
| Li <sub>2</sub> Mg <sub>3</sub> Ti <sub>6</sub> O <sub>16</sub>               | 1.79 | K1.79 | K1.79Li <sub>2</sub> Mg <sub>3</sub> Ti <sub>6</sub> O <sub>16</sub>               |
| Li <sub>2</sub> MgCo <sub>13</sub> O <sub>28</sub>                            | 5.31 | K5.31 | K5.31Li <sub>2</sub> MgCo <sub>13</sub> O <sub>28</sub>                            |
| Li <sub>2</sub> MgCo <sub>3</sub> O <sub>8</sub>                              | 1.48 | K1.48 | K1.48Li <sub>2</sub> MgCo <sub>3</sub> O <sub>8</sub>                              |
| Li <sub>2</sub> MgNi <sub>3</sub> O <sub>8</sub>                              | 1.7  | K1.7  | K1.7Li <sub>2</sub> MgNi <sub>3</sub> O <sub>8</sub>                               |
| Li <sub>2</sub> Mn(FeO <sub>3</sub> ) <sub>2</sub>                            | 0.97 | K0.97 | K0.97Li <sub>2</sub> Mn(FeO <sub>3</sub> ) <sub>2</sub>                            |
| Li <sub>2</sub> Mn(NiO <sub>3</sub> ) <sub>2</sub>                            | 1.32 | K1.32 | K1.32Li <sub>2</sub> Mn(NiO <sub>3</sub> ) <sub>2</sub>                            |
| Li <sub>2</sub> Mn(PO <sub>4</sub> ) <sub>2</sub>                             | 1.19 | K1.19 | K1.19Li <sub>2</sub> Mn(PO <sub>4</sub> ) <sub>2</sub>                             |
| Li <sub>2</sub> Mn <sub>2</sub> P <sub>4</sub> H <sub>3</sub> O <sub>16</sub> | 2.39 | K2.39 | K2.39Li <sub>2</sub> Mn <sub>2</sub> P <sub>4</sub> H <sub>3</sub> O <sub>16</sub> |

|                                                                  |      |       |                                                                       |
|------------------------------------------------------------------|------|-------|-----------------------------------------------------------------------|
| Li <sub>2</sub> Mn <sub>2</sub> Si <sub>3</sub> O <sub>10</sub>  | 1.82 | K1.82 | K1.82Li <sub>2</sub> Mn <sub>2</sub> Si <sub>3</sub> O <sub>10</sub>  |
| Li <sub>2</sub> Mn <sub>3</sub> (BO <sub>3</sub> ) <sub>3</sub>  | 1.13 | K1.13 | K1.13Li <sub>2</sub> Mn <sub>3</sub> (BO <sub>3</sub> ) <sub>3</sub>  |
| Li <sub>2</sub> Mn <sub>3</sub> (BO <sub>3</sub> ) <sub>3</sub>  | 1.53 | K1.53 | K1.53Li <sub>2</sub> Mn <sub>3</sub> (BO <sub>3</sub> ) <sub>3</sub>  |
| Li <sub>2</sub> Mn <sub>3</sub> (FeO <sub>4</sub> ) <sub>3</sub> | 3.55 | K3.55 | K3.55Li <sub>2</sub> Mn <sub>3</sub> (FeO <sub>4</sub> ) <sub>3</sub> |
| Li <sub>2</sub> Mn <sub>3</sub> Cr <sub>3</sub> O <sub>12</sub>  | 3.26 | K3.26 | K3.26Li <sub>2</sub> Mn <sub>3</sub> Cr <sub>3</sub> O <sub>12</sub>  |
| Li <sub>2</sub> Mn <sub>3</sub> NiO <sub>8</sub>                 | 1.41 | K1.41 | K1.41Li <sub>2</sub> Mn <sub>3</sub> NiO <sub>8</sub>                 |
| Li <sub>2</sub> Mn <sub>3</sub> O <sub>6</sub>                   | 1.1  | K1.1  | K1.1Li <sub>2</sub> Mn <sub>3</sub> O <sub>6</sub>                    |
| Li <sub>2</sub> Mn <sub>3</sub> O <sub>7</sub>                   | 1.25 | K1.25 | K1.25Li <sub>2</sub> Mn <sub>3</sub> O <sub>7</sub>                   |
| Li <sub>2</sub> Mn <sub>5</sub> (FeO <sub>6</sub> ) <sub>2</sub> | 3.36 | K3.36 | K3.36Li <sub>2</sub> Mn <sub>5</sub> (FeO <sub>6</sub> ) <sub>2</sub> |
| Li <sub>2</sub> MnBAsO <sub>7</sub>                              | 1.18 | K1.18 | K1.18Li <sub>2</sub> MnBAsO <sub>7</sub>                              |
| Li <sub>2</sub> MnBPO <sub>7</sub>                               | 1.07 | K1.07 | K1.07Li <sub>2</sub> MnBPO <sub>7</sub>                               |
| Li <sub>2</sub> MnCr <sub>3</sub> O <sub>8</sub>                 | 1.8  | K1.8  | K1.8Li <sub>2</sub> MnCr <sub>3</sub> O <sub>8</sub>                  |
| Li <sub>2</sub> MnCr <sub>3</sub> O <sub>8</sub>                 | 2.28 | K2.28 | K2.28Li <sub>2</sub> MnCr <sub>3</sub> O <sub>8</sub>                 |
| Li <sub>2</sub> MnCr <sub>3</sub> O <sub>8</sub>                 | 2.08 | K2.08 | K2.08Li <sub>2</sub> MnCr <sub>3</sub> O <sub>8</sub>                 |
| Li <sub>2</sub> MnF <sub>5</sub>                                 | 0.87 | K0.87 | K0.87Li <sub>2</sub> MnF <sub>5</sub>                                 |
| Li <sub>2</sub> MnF <sub>6</sub>                                 | 1.09 | K1.09 | K1.09Li <sub>2</sub> MnF <sub>6</sub>                                 |
| Li <sub>2</sub> MnFe <sub>3</sub> O <sub>8</sub>                 | 1.56 | K1.56 | K1.56Li <sub>2</sub> MnFe <sub>3</sub> O <sub>8</sub>                 |
| Li <sub>2</sub> MnNi <sub>3</sub> O <sub>8</sub>                 | 1.82 | K1.82 | K1.82Li <sub>2</sub> MnNi <sub>3</sub> O <sub>8</sub>                 |
| Li <sub>2</sub> MnOF <sub>3</sub>                                | 0.79 | K0.79 | K0.79Li <sub>2</sub> MnOF <sub>3</sub>                                |
| Li <sub>2</sub> MnP <sub>2</sub> HO <sub>8</sub>                 | 1.21 | K1.21 | K1.21Li <sub>2</sub> MnP <sub>2</sub> HO <sub>8</sub>                 |
| Li <sub>2</sub> MnPCO <sub>7</sub>                               | 1.18 | K1.18 | K1.18Li <sub>2</sub> MnPCO <sub>7</sub>                               |
| Li <sub>2</sub> MnSiCO <sub>7</sub>                              | 1.02 | K1.02 | K1.02Li <sub>2</sub> MnSiCO <sub>7</sub>                              |
| Li <sub>2</sub> MnV(PO <sub>4</sub> ) <sub>3</sub>               | 1.42 | K1.42 | K1.42Li <sub>2</sub> MnV(PO <sub>4</sub> ) <sub>3</sub>               |
| Li <sub>2</sub> MnV <sub>2</sub> O <sub>6</sub>                  | 1.23 | K1.23 | K1.23Li <sub>2</sub> MnV <sub>2</sub> O <sub>6</sub>                  |

|                                                                 |      |       |                                                                      |
|-----------------------------------------------------------------|------|-------|----------------------------------------------------------------------|
| Li <sub>2</sub> MnV <sub>3</sub> O <sub>8</sub>                 | 1.74 | K1.74 | K1.74Li <sub>2</sub> MnV <sub>3</sub> O <sub>8</sub>                 |
| Li <sub>2</sub> Mo(PO <sub>4</sub> ) <sub>2</sub>               | 1.16 | K1.16 | K1.16Li <sub>2</sub> Mo(PO <sub>4</sub> ) <sub>2</sub>               |
| Li <sub>2</sub> Nb <sub>2</sub> Fe <sub>3</sub> O <sub>10</sub> | 2.63 | K2.63 | K2.63Li <sub>2</sub> Nb <sub>2</sub> Fe <sub>3</sub> O <sub>10</sub> |
| Li <sub>2</sub> Nb <sub>4</sub> ZnO <sub>12</sub>               | 2.58 | K2.58 | K2.58Li <sub>2</sub> Nb <sub>4</sub> ZnO <sub>12</sub>               |
| Li <sub>2</sub> Nb <sub>6</sub> NiO <sub>18</sub>               | 3.5  | K3.5  | K3.5Li <sub>2</sub> Nb <sub>6</sub> NiO <sub>18</sub>                |
| Li <sub>2</sub> Ni <sub>2</sub> SnO <sub>6</sub>                | 0.94 | K0.94 | K0.94Li <sub>2</sub> Ni <sub>2</sub> SnO <sub>6</sub>                |
| Li <sub>2</sub> Ni <sub>3</sub> (BO <sub>3</sub> ) <sub>3</sub> | 0.96 | K0.96 | K0.96Li <sub>2</sub> Ni <sub>3</sub> (BO <sub>3</sub> ) <sub>3</sub> |
| Li <sub>2</sub> Ni <sub>3</sub> TeO <sub>8</sub>                | 1.75 | K1.75 | K1.75Li <sub>2</sub> Ni <sub>3</sub> TeO <sub>8</sub>                |
| Li <sub>2</sub> Ni <sub>5</sub> O <sub>9</sub>                  | 1.97 | K1.97 | K1.97Li <sub>2</sub> Ni <sub>5</sub> O <sub>9</sub>                  |
| Li <sub>2</sub> Sn(BO <sub>3</sub> ) <sub>2</sub>               | 0.93 | K0.93 | K0.93Li <sub>2</sub> Sn(BO <sub>3</sub> ) <sub>2</sub>               |
| Li <sub>2</sub> Ti(BO <sub>3</sub> ) <sub>2</sub>               | 0.75 | K0.75 | K0.75Li <sub>2</sub> Ti(BO <sub>3</sub> ) <sub>2</sub>               |
| Li <sub>2</sub> Ti(FeO <sub>3</sub> ) <sub>2</sub>              | 1.12 | K1.12 | K1.12Li <sub>2</sub> Ti(FeO <sub>3</sub> ) <sub>2</sub>              |
| Li <sub>2</sub> Ti(NiO <sub>3</sub> ) <sub>2</sub>              | 1.01 | K1.01 | K1.01Li <sub>2</sub> Ti(NiO <sub>3</sub> ) <sub>2</sub>              |
| Li <sub>2</sub> Ti(TeO <sub>4</sub> ) <sub>3</sub>              | 2.38 | K2.38 | K2.38Li <sub>2</sub> Ti(TeO <sub>4</sub> ) <sub>3</sub>              |
| Li <sub>2</sub> Ti <sub>2</sub> Fe <sub>3</sub> O <sub>10</sub> | 2.34 | K2.34 | K2.34Li <sub>2</sub> Ti <sub>2</sub> Fe <sub>3</sub> O <sub>10</sub> |
| Li <sub>2</sub> Ti <sub>2</sub> Mn <sub>5</sub> O <sub>12</sub> | 2.89 | K2.89 | K2.89Li <sub>2</sub> Ti <sub>2</sub> Mn <sub>5</sub> O <sub>12</sub> |
| Li <sub>2</sub> Ti <sub>3</sub> NiO <sub>8</sub>                | 1.13 | K1.13 | K1.13Li <sub>2</sub> Ti <sub>3</sub> NiO <sub>8</sub>                |
| Li <sub>2</sub> Ti <sub>3</sub> V <sub>3</sub> O <sub>12</sub>  | 2.29 | K2.29 | K2.29Li <sub>2</sub> Ti <sub>3</sub> V <sub>3</sub> O <sub>12</sub>  |
| Li <sub>2</sub> Ti <sub>6</sub> Zn <sub>3</sub> O <sub>16</sub> | 2.64 | K2.64 | K2.64Li <sub>2</sub> Ti <sub>6</sub> Zn <sub>3</sub> O <sub>16</sub> |
| Li <sub>2</sub> Ti <sub>7</sub> Nb <sub>6</sub> O <sub>30</sub> | 3.57 | K3.57 | K3.57Li <sub>2</sub> Ti <sub>7</sub> Nb <sub>6</sub> O <sub>30</sub> |
| Li <sub>2</sub> TiCr <sub>3</sub> O <sub>8</sub>                | 2.09 | K2.09 | K2.09Li <sub>2</sub> TiCr <sub>3</sub> O <sub>8</sub>                |
| Li <sub>2</sub> TiFe <sub>3</sub> O <sub>8</sub>                | 1.33 | K1.33 | K1.33Li <sub>2</sub> TiFe <sub>3</sub> O <sub>8</sub>                |
| Li <sub>2</sub> TiV <sub>3</sub> O <sub>8</sub>                 | 1.34 | K1.34 | K1.34Li <sub>2</sub> TiV <sub>3</sub> O <sub>8</sub>                 |
| Li <sub>2</sub> TiV <sub>3</sub> O <sub>8</sub>                 | 1.06 | K1.06 | K1.06Li <sub>2</sub> TiV <sub>3</sub> O <sub>8</sub>                 |

|                                                                    |      |       |                                                                         |
|--------------------------------------------------------------------|------|-------|-------------------------------------------------------------------------|
| Li <sub>2</sub> V(CO <sub>3</sub> ) <sub>3</sub>                   | 1.07 | K1.07 | K1.07Li <sub>2</sub> V(CO <sub>3</sub> ) <sub>3</sub>                   |
| Li <sub>2</sub> V(OF) <sub>2</sub>                                 | 0.8  | K0.8  | K0.8Li <sub>2</sub> V(OF) <sub>2</sub>                                  |
| Li <sub>2</sub> V(PO <sub>4</sub> ) <sub>2</sub>                   | 1.3  | K1.3  | K1.3Li <sub>2</sub> V(PO <sub>4</sub> ) <sub>2</sub>                    |
| Li <sub>2</sub> V(Si <sub>2</sub> O <sub>5</sub> ) <sub>3</sub>    | 1.79 | K1.79 | K1.79Li <sub>2</sub> V(Si <sub>2</sub> O <sub>5</sub> ) <sub>3</sub>    |
| Li <sub>2</sub> V <sub>2</sub> FeO <sub>6</sub>                    | 1.11 | K1.11 | K1.11Li <sub>2</sub> V <sub>2</sub> FeO <sub>6</sub>                    |
| Li <sub>2</sub> V <sub>2</sub> SiGeO <sub>10</sub>                 | 1.35 | K1.35 | K1.35Li <sub>2</sub> V <sub>2</sub> SiGeO <sub>10</sub>                 |
| Li <sub>2</sub> V <sub>3</sub> CoO <sub>8</sub>                    | 1.4  | K1.4  | K1.4Li <sub>2</sub> V <sub>3</sub> CoO <sub>8</sub>                     |
| Li <sub>2</sub> V <sub>3</sub> CrO <sub>8</sub>                    | 1.85 | K1.85 | K1.85Li <sub>2</sub> V <sub>3</sub> CrO <sub>8</sub>                    |
| Li <sub>2</sub> V <sub>3</sub> O <sub>3</sub> F <sub>5</sub>       | 1.03 | K1.03 | K1.03Li <sub>2</sub> V <sub>3</sub> O <sub>3</sub> F <sub>5</sub>       |
| Li <sub>2</sub> V <sub>5</sub> Cr <sub>2</sub> O <sub>12</sub>     | 3.02 | K3.02 | K3.02Li <sub>2</sub> V <sub>5</sub> Cr <sub>2</sub> O <sub>12</sub>     |
| Li <sub>2</sub> VBPO <sub>7</sub>                                  | 0.79 | K0.79 | K0.79Li <sub>2</sub> VBPO <sub>7</sub>                                  |
| Li <sub>2</sub> VCr <sub>2</sub> O <sub>6</sub>                    | 1.45 | K1.45 | K1.45Li <sub>2</sub> VCr <sub>2</sub> O <sub>6</sub>                    |
| Li <sub>2</sub> VCr <sub>3</sub> O <sub>8</sub>                    | 1.95 | K1.95 | K1.95Li <sub>2</sub> VCr <sub>3</sub> O <sub>8</sub>                    |
| Li <sub>2</sub> VFe <sub>3</sub> O <sub>8</sub>                    | 1.33 | K1.33 | K1.33Li <sub>2</sub> VFe <sub>3</sub> O <sub>8</sub>                    |
| Li <sub>2</sub> VGa <sub>3</sub> O <sub>8</sub>                    | 2.03 | K2.03 | K2.03Li <sub>2</sub> VGa <sub>3</sub> O <sub>8</sub>                    |
| Li <sub>2</sub> VO <sub>3</sub> F                                  | 0.8  | K0.8  | K0.8Li <sub>2</sub> VO <sub>3</sub> F                                   |
| Li <sub>2</sub> VO <sub>3</sub> F                                  | 0.8  | K0.8  | K0.8Li <sub>2</sub> VO <sub>3</sub> F                                   |
| Li <sub>2</sub> VO <sub>3</sub> F                                  | 0.85 | K0.85 | K0.85Li <sub>2</sub> VO <sub>3</sub> F                                  |
| Li <sub>2</sub> VOF <sub>5</sub>                                   | 0.95 | K0.95 | K0.95Li <sub>2</sub> VOF <sub>5</sub>                                   |
| Li <sub>2</sub> VSi <sub>2</sub> O <sub>7</sub>                    | 1.08 | K1.08 | K1.08Li <sub>2</sub> VSi <sub>2</sub> O <sub>7</sub>                    |
| Li <sub>2</sub> Zr <sub>7</sub> Fe(PO <sub>4</sub> ) <sub>12</sub> | 6.63 | K6.63 | K6.63Li <sub>2</sub> Zr <sub>7</sub> Fe(PO <sub>4</sub> ) <sub>12</sub> |
| Li <sub>3</sub> (CoS <sub>2</sub> ) <sub>4</sub>                   | 1.32 | K1.32 | K1.32Li <sub>3</sub> (CoS <sub>2</sub> ) <sub>4</sub>                   |
| Li <sub>3</sub> (CuO <sub>2</sub> ) <sub>2</sub>                   | 1.13 | K1.13 | K1.13Li <sub>3</sub> (CuO <sub>2</sub> ) <sub>2</sub>                   |
| Li <sub>3</sub> (NiO <sub>2</sub> ) <sub>4</sub>                   | 1.22 | K1.22 | K1.22Li <sub>3</sub> (NiO <sub>2</sub> ) <sub>4</sub>                   |

|                                                                                |      |       |                                                                                     |
|--------------------------------------------------------------------------------|------|-------|-------------------------------------------------------------------------------------|
| Li <sub>3</sub> (NiO <sub>2</sub> ) <sub>5</sub>                               | 1.6  | K1.6  | K1.6Li <sub>3</sub> (NiO <sub>2</sub> ) <sub>5</sub>                                |
| Li <sub>3</sub> Co <sub>2</sub> Cu <sub>3</sub> O <sub>10</sub>                | 1.92 | K1.92 | K1.92Li <sub>3</sub> Co <sub>2</sub> Cu <sub>3</sub> O <sub>10</sub>                |
| Li <sub>3</sub> Co <sub>2</sub> Ni <sub>3</sub> O <sub>10</sub>                | 1.86 | K1.86 | K1.86Li <sub>3</sub> Co <sub>2</sub> Ni <sub>3</sub> O <sub>10</sub>                |
| Li <sub>3</sub> Cr(PO <sub>4</sub> ) <sub>2</sub>                              | 1.13 | K1.13 | K1.13Li <sub>3</sub> Cr(PO <sub>4</sub> ) <sub>2</sub>                              |
| Li <sub>3</sub> Cr <sub>2</sub> Fe <sub>3</sub> O <sub>10</sub>                | 1.98 | K1.98 | K1.98Li <sub>3</sub> Cr <sub>2</sub> Fe <sub>3</sub> O <sub>10</sub>                |
| Li <sub>3</sub> Cr <sub>2</sub> Fe <sub>5</sub> O <sub>12</sub>                | 2.39 | K2.39 | K2.39Li <sub>3</sub> Cr <sub>2</sub> Fe <sub>5</sub> O <sub>12</sub>                |
| Li <sub>3</sub> Cr <sub>2</sub> P <sub>2</sub> (CO <sub>7</sub> ) <sub>2</sub> | 1.98 | K1.98 | K1.98Li <sub>3</sub> Cr <sub>2</sub> P <sub>2</sub> (CO <sub>7</sub> ) <sub>2</sub> |
| Li <sub>3</sub> Cr <sub>3</sub> CuO <sub>8</sub>                               | 1.3  | K1.3  | K1.3Li <sub>3</sub> Cr <sub>3</sub> CuO <sub>8</sub>                                |
| Li <sub>3</sub> Cr <sub>3</sub> GaO <sub>8</sub>                               | 1.48 | K1.48 | K1.48Li <sub>3</sub> Cr <sub>3</sub> GaO <sub>8</sub>                               |
| Li <sub>3</sub> Cr <sub>3</sub> NiO <sub>8</sub>                               | 1.38 | K1.38 | K1.38Li <sub>3</sub> Cr <sub>3</sub> NiO <sub>8</sub>                               |
| Li <sub>3</sub> CrFe <sub>3</sub> O <sub>8</sub>                               | 1.36 | K1.36 | K1.36Li <sub>3</sub> CrFe <sub>3</sub> O <sub>8</sub>                               |
| Li <sub>3</sub> CrNi <sub>3</sub> O <sub>8</sub>                               | 1.41 | K1.41 | K1.41Li <sub>3</sub> CrNi <sub>3</sub> O <sub>8</sub>                               |
| Li <sub>3</sub> Cu(PO <sub>4</sub> ) <sub>2</sub>                              | 1.13 | K1.13 | K1.13Li <sub>3</sub> Cu(PO <sub>4</sub> ) <sub>2</sub>                              |
| Li <sub>3</sub> Cu <sub>3</sub> TeO <sub>8</sub>                               | 1.43 | K1.43 | K1.43Li <sub>3</sub> Cu <sub>3</sub> TeO <sub>8</sub>                               |
| Li <sub>3</sub> CuF <sub>6</sub>                                               | 0.85 | K0.85 | K0.85Li <sub>3</sub> CuF <sub>6</sub>                                               |
| Li <sub>3</sub> CuNi <sub>3</sub> O <sub>8</sub>                               | 1.22 | K1.22 | K1.22Li <sub>3</sub> CuNi <sub>3</sub> O <sub>8</sub>                               |
| Li <sub>3</sub> Fe(Ni <sub>2</sub> O <sub>5</sub> ) <sub>2</sub>               | 1.73 | K1.73 | K1.73Li <sub>3</sub> Fe(Ni <sub>2</sub> O <sub>5</sub> ) <sub>2</sub>               |
| Li <sub>3</sub> Fe <sub>2</sub> (PO <sub>4</sub> ) <sub>3</sub>                | 1.31 | K1.31 | K1.31Li <sub>3</sub> Fe <sub>2</sub> (PO <sub>4</sub> ) <sub>3</sub>                |
| Li <sub>3</sub> Fe <sub>2</sub> (SiO <sub>4</sub> ) <sub>2</sub>               | 1.29 | K1.29 | K1.29Li <sub>3</sub> Fe <sub>2</sub> (SiO <sub>4</sub> ) <sub>2</sub>               |
| Li <sub>3</sub> Fe <sub>2</sub> Ni <sub>3</sub> O <sub>10</sub>                | 1.6  | K1.6  | K1.6Li <sub>3</sub> Fe <sub>2</sub> Ni <sub>3</sub> O <sub>10</sub>                 |
| Li <sub>3</sub> Fe <sub>2</sub> P <sub>2</sub> (CO <sub>7</sub> ) <sub>2</sub> | 1.98 | K1.98 | K1.98Li <sub>3</sub> Fe <sub>2</sub> P <sub>2</sub> (CO <sub>7</sub> ) <sub>2</sub> |
| Li <sub>3</sub> Fe <sub>2</sub> P <sub>2</sub> (O <sub>4</sub> F) <sub>2</sub> | 1.39 | K1.39 | K1.39Li <sub>3</sub> Fe <sub>2</sub> P <sub>2</sub> (O <sub>4</sub> F) <sub>2</sub> |
| Li <sub>3</sub> Fe <sub>3</sub> (BO <sub>3</sub> ) <sub>4</sub>                | 1.4  | K1.4  | K1.4Li <sub>3</sub> Fe <sub>3</sub> (BO <sub>3</sub> ) <sub>4</sub>                 |
| Li <sub>3</sub> Fe <sub>3</sub> (SnO <sub>5</sub> ) <sub>2</sub>               | 2.19 | K2.19 | K2.19Li <sub>3</sub> Fe <sub>3</sub> (SnO <sub>5</sub> ) <sub>2</sub>               |

|                 |      |       |                      |
|-----------------|------|-------|----------------------|
| Li3Fe3O8        | 1.57 | K1.57 | K1.57Li3Fe3O8        |
| Li3Fe3SbO8      | 1.36 | K1.36 | K1.36Li3Fe3SbO8      |
| Li3Fe3TeO8      | 1.32 | K1.32 | K1.32Li3Fe3TeO8      |
| Li3Fe3WO8       | 1.24 | K1.24 | K1.24Li3Fe3WO8       |
| Li3Fe4(P2O7)4   | 4.17 | K4.17 | K4.17Li3Fe4(P2O7)4   |
| Li3Fe4(Si3O10)2 | 3.73 | K3.73 | K3.73Li3Fe4(Si3O10)2 |
| Li3Fe5(CoO6)2   | 2.45 | K2.45 | K2.45Li3Fe5(CoO6)2   |
| Li3Fe5(NiO6)2   | 2.44 | K2.44 | K2.44Li3Fe5(NiO6)2   |
| Li3Fe5O12       | 2.14 | K2.14 | K2.14Li3Fe5O12       |
| Li3Fe7O12       | 2.53 | K2.53 | K2.53Li3Fe7O12       |
| Li3Fe8(BO3)8    | 2.72 | K2.72 | K2.72Li3Fe8(BO3)8    |
| Li3FeOF4        | 1.03 | K1.03 | K1.03Li3FeOF4        |
| Li3La5Ti6Nb2O26 | 3.28 | K3.28 | K3.28Li3La5Ti6Nb2O26 |
| Li3Mn2(CO5)2    | 1.26 | K1.26 | K1.26Li3Mn2(CO5)2    |
| Li3Mn2(SiO4)2   | 1.26 | K1.26 | K1.26Li3Mn2(SiO4)2   |
| Li3Mn2Fe(BO3)4  | 1.65 | K1.65 | K1.65Li3Mn2Fe(BO3)4  |
| Li3Mn2Ni5O12    | 2.54 | K2.54 | K2.54Li3Mn2Ni5O12    |
| Li3Mn2P2(CO7)2  | 2.16 | K2.16 | K2.16Li3Mn2P2(CO7)2  |
| Li3Mn2V5O12     | 2.22 | K2.22 | K2.22Li3Mn2V5O12     |
| Li3Mn3(BO3)4    | 1.46 | K1.46 | K1.46Li3Mn3(BO3)4    |
| Li3Mn3(FeO5)2   | 1.72 | K1.72 | K1.72Li3Mn3(FeO5)2   |
| Li3Mn3(PO4)4    | 2.69 | K2.69 | K2.69Li3Mn3(PO4)4    |
| Li3Mn3O5F3      | 1.66 | K1.66 | K1.66Li3Mn3O5F3      |
| Li3Mn3O8        | 1.13 | K1.13 | K1.13Li3Mn3O8        |

|                                                                  |      |       |                                                                       |
|------------------------------------------------------------------|------|-------|-----------------------------------------------------------------------|
| Li <sub>3</sub> Mn <sub>3</sub> WO <sub>8</sub>                  | 1.31 | K1.31 | K1.31Li <sub>3</sub> Mn <sub>3</sub> WO <sub>8</sub>                  |
| Li <sub>3</sub> Mn <sub>4</sub> (BO <sub>3</sub> ) <sub>4</sub>  | 1.62 | K1.62 | K1.62Li <sub>3</sub> Mn <sub>4</sub> (BO <sub>3</sub> ) <sub>4</sub>  |
| Li <sub>3</sub> Mn <sub>4</sub> O <sub>8</sub>                   | 1.32 | K1.32 | K1.32Li <sub>3</sub> Mn <sub>4</sub> O <sub>8</sub>                   |
| Li <sub>3</sub> Mn <sub>5</sub> (CoO <sub>6</sub> ) <sub>2</sub> | 1.84 | K1.84 | K1.84Li <sub>3</sub> Mn <sub>5</sub> (CoO <sub>6</sub> ) <sub>2</sub> |
| Li <sub>3</sub> Mn <sub>7</sub> O <sub>16</sub>                  | 3.28 | K3.28 | K3.28Li <sub>3</sub> Mn <sub>7</sub> O <sub>16</sub>                  |
| Li <sub>3</sub> MnCu <sub>3</sub> O <sub>8</sub>                 | 1.14 | K1.14 | K1.14Li <sub>3</sub> MnCu <sub>3</sub> O <sub>8</sub>                 |
| Li <sub>3</sub> MnOF <sub>4</sub>                                | 0.93 | K0.93 | K0.93Li <sub>3</sub> MnOF <sub>4</sub>                                |
| Li <sub>3</sub> MnP <sub>2</sub> O <sub>9</sub>                  | 1.2  | K1.2  | K1.2Li <sub>3</sub> MnP <sub>2</sub> O <sub>9</sub>                   |
| Li <sub>3</sub> MnSi <sub>2</sub> O <sub>7</sub>                 | 1.23 | K1.23 | K1.23Li <sub>3</sub> MnSi <sub>2</sub> O <sub>7</sub>                 |
| Li <sub>3</sub> MnV(PO <sub>4</sub> ) <sub>3</sub>               | 1.3  | K1.3  | K1.3Li <sub>3</sub> MnV(PO <sub>4</sub> ) <sub>3</sub>                |
| Li <sub>3</sub> MnV <sub>3</sub> O <sub>8</sub>                  | 1.54 | K1.54 | K1.54Li <sub>3</sub> MnV <sub>3</sub> O <sub>8</sub>                  |
| Li <sub>3</sub> Mo <sub>2</sub> P <sub>5</sub> O <sub>18</sub>   | 2.45 | K2.45 | K2.45Li <sub>3</sub> Mo <sub>2</sub> P <sub>5</sub> O <sub>18</sub>   |
| Li <sub>3</sub> MoP <sub>2</sub> O <sub>9</sub>                  | 1.26 | K1.26 | K1.26Li <sub>3</sub> MoP <sub>2</sub> O <sub>9</sub>                  |
| Li <sub>3</sub> Nb <sub>3</sub> P <sub>8</sub> O <sub>29</sub>   | 3.94 | K3.94 | K3.94Li <sub>3</sub> Nb <sub>3</sub> P <sub>8</sub> O <sub>29</sub>   |
| Li <sub>3</sub> Nb <sub>3</sub> TeO <sub>12</sub>                | 2.22 | K2.22 | K2.22Li <sub>3</sub> Nb <sub>3</sub> TeO <sub>12</sub>                |
| Li <sub>3</sub> NbFe <sub>3</sub> O <sub>8</sub>                 | 1.38 | K1.38 | K1.38Li <sub>3</sub> NbFe <sub>3</sub> O <sub>8</sub>                 |
| Li <sub>3</sub> NbNi <sub>3</sub> O <sub>8</sub>                 | 1.12 | K1.12 | K1.12Li <sub>3</sub> NbNi <sub>3</sub> O <sub>8</sub>                 |
| Li <sub>3</sub> NbV <sub>3</sub> O <sub>8</sub>                  | 1.23 | K1.23 | K1.23Li <sub>3</sub> NbV <sub>3</sub> O <sub>8</sub>                  |
| Li <sub>3</sub> Ni <sub>2</sub> (CO <sub>3</sub> ) <sub>4</sub>  | 1.34 | K1.34 | K1.34Li <sub>3</sub> Ni <sub>2</sub> (CO <sub>3</sub> ) <sub>4</sub>  |
| Li <sub>3</sub> Ni <sub>3</sub> SbO <sub>8</sub>                 | 1.33 | K1.33 | K1.33Li <sub>3</sub> Ni <sub>3</sub> SbO <sub>8</sub>                 |
| Li <sub>3</sub> Sb <sub>2</sub> P <sub>5</sub> O <sub>18</sub>   | 3.27 | K3.27 | K3.27Li <sub>3</sub> Sb <sub>2</sub> P <sub>5</sub> O <sub>18</sub>   |
| Li <sub>3</sub> Sb <sub>3</sub> P <sub>8</sub> O <sub>29</sub>   | 4.66 | K4.66 | K4.66Li <sub>3</sub> Sb <sub>3</sub> P <sub>8</sub> O <sub>29</sub>   |
| Li <sub>3</sub> Si <sub>2</sub> (NiO <sub>4</sub> ) <sub>2</sub> | 1.28 | K1.28 | K1.28Li <sub>3</sub> Si <sub>2</sub> (NiO <sub>4</sub> ) <sub>2</sub> |
| Li <sub>3</sub> Ti <sub>3</sub> CrO <sub>8</sub>                 | 1.52 | K1.52 | K1.52Li <sub>3</sub> Ti <sub>3</sub> CrO <sub>8</sub>                 |



|                                                                 |      |       |                                                                      |
|-----------------------------------------------------------------|------|-------|----------------------------------------------------------------------|
| Li <sub>3</sub> Ti <sub>4</sub> O <sub>8</sub>                  | 1.14 | K1.14 | K1.14Li <sub>3</sub> Ti <sub>4</sub> O <sub>8</sub>                  |
| Li <sub>3</sub> TiFe <sub>3</sub> O <sub>8</sub>                | 1.41 | K1.41 | K1.41Li <sub>3</sub> TiFe <sub>3</sub> O <sub>8</sub>                |
| Li <sub>3</sub> TiNi <sub>3</sub> O <sub>8</sub>                | 1.19 | K1.19 | K1.19Li <sub>3</sub> TiNi <sub>3</sub> O <sub>8</sub>                |
| Li <sub>3</sub> V <sub>2</sub> (NiO <sub>4</sub> ) <sub>2</sub> | 1.38 | K1.38 | K1.38Li <sub>3</sub> V <sub>2</sub> (NiO <sub>4</sub> ) <sub>2</sub> |
| Li <sub>3</sub> V <sub>2</sub> (O <sub>2</sub> F) <sub>2</sub>  | 1.19 | K1.19 | K1.19Li <sub>3</sub> V <sub>2</sub> (O <sub>2</sub> F) <sub>2</sub>  |
| Li <sub>3</sub> V <sub>2</sub> F <sub>12</sub>                  | 1.56 | K1.56 | K1.56Li <sub>3</sub> V <sub>2</sub> F <sub>12</sub>                  |
| Li <sub>3</sub> V <sub>2</sub> Fe <sub>3</sub> O <sub>10</sub>  | 1.76 | K1.76 | K1.76Li <sub>3</sub> V <sub>2</sub> Fe <sub>3</sub> O <sub>10</sub>  |
| Li <sub>3</sub> V <sub>3</sub> (FeO <sub>5</sub> ) <sub>2</sub> | 1.81 | K1.81 | K1.81Li <sub>3</sub> V <sub>3</sub> (FeO <sub>5</sub> ) <sub>2</sub> |
| Li <sub>3</sub> V <sub>3</sub> (FeO <sub>6</sub> ) <sub>2</sub> | 2.1  | K2.1  | K2.1Li <sub>3</sub> V <sub>3</sub> (FeO <sub>6</sub> ) <sub>2</sub>  |
| Li <sub>3</sub> V <sub>3</sub> CoO <sub>8</sub>                 | 1.61 | K1.61 | K1.61Li <sub>3</sub> V <sub>3</sub> CoO <sub>8</sub>                 |
| Li <sub>3</sub> V <sub>3</sub> Cr <sub>2</sub> O <sub>10</sub>  | 1.93 | K1.93 | K1.93Li <sub>3</sub> V <sub>3</sub> Cr <sub>2</sub> O <sub>10</sub>  |
| Li <sub>3</sub> V <sub>3</sub> FeO <sub>8</sub>                 | 1.5  | K1.5  | K1.5Li <sub>3</sub> V <sub>3</sub> FeO <sub>8</sub>                  |
| Li <sub>3</sub> V <sub>3</sub> P <sub>8</sub> O <sub>29</sub>   | 4.26 | K4.26 | K4.26Li <sub>3</sub> V <sub>3</sub> P <sub>8</sub> O <sub>29</sub>   |
| Li <sub>3</sub> V <sub>4</sub> (PO <sub>4</sub> ) <sub>6</sub>  | 3.47 | K3.47 | K3.47Li <sub>3</sub> V <sub>4</sub> (PO <sub>4</sub> ) <sub>6</sub>  |
| Li <sub>3</sub> V <sub>7</sub> O <sub>12</sub>                  | 1.78 | K1.78 | K1.78Li <sub>3</sub> V <sub>7</sub> O <sub>12</sub>                  |
| Li <sub>3</sub> VAs <sub>2</sub> O <sub>9</sub>                 | 1.07 | K1.07 | K1.07Li <sub>3</sub> VAs <sub>2</sub> O <sub>9</sub>                 |
| Li <sub>3</sub> VFe <sub>3</sub> O <sub>8</sub>                 | 1.49 | K1.49 | K1.49Li <sub>3</sub> VFe <sub>3</sub> O <sub>8</sub>                 |
| Li <sub>3</sub> VO <sub>3</sub> F <sub>2</sub>                  | 0.95 | K0.95 | K0.95Li <sub>3</sub> VO <sub>3</sub> F <sub>2</sub>                  |
| Li <sub>3</sub> ZrNb(TeO <sub>6</sub> ) <sub>2</sub>            | 2.13 | K2.13 | K2.13Li <sub>3</sub> ZrNb(TeO <sub>6</sub> ) <sub>2</sub>            |
| Li <sub>4</sub> (NiO <sub>2</sub> ) <sub>11</sub>               | 4.55 | K4.55 | K4.55Li <sub>4</sub> (NiO <sub>2</sub> ) <sub>11</sub>               |
| Li <sub>4</sub> (NiO <sub>2</sub> ) <sub>5</sub>                | 1.76 | K1.76 | K1.76Li <sub>4</sub> (NiO <sub>2</sub> ) <sub>5</sub>                |
| Li <sub>4</sub> Co <sub>13</sub> O <sub>28</sub>                | 5.34 | K5.34 | K5.34Li <sub>4</sub> Co <sub>13</sub> O <sub>28</sub>                |
| Li <sub>4</sub> Co <sub>2</sub> C <sub>4</sub> SO <sub>16</sub> | 1.83 | K1.83 | K1.83Li <sub>4</sub> Co <sub>2</sub> C <sub>4</sub> SO <sub>16</sub> |
| Li <sub>4</sub> Co <sub>2</sub> Ni <sub>3</sub> O <sub>10</sub> | 1.39 | K1.39 | K1.39Li <sub>4</sub> Co <sub>2</sub> Ni <sub>3</sub> O <sub>10</sub> |

|                                                                                  |      |       |                                                                                       |
|----------------------------------------------------------------------------------|------|-------|---------------------------------------------------------------------------------------|
| Li <sub>4</sub> Co <sub>3</sub> (NiO <sub>4</sub> ) <sub>3</sub>                 | 1.79 | K1.79 | K1.79Li <sub>4</sub> Co <sub>3</sub> (NiO <sub>4</sub> ) <sub>3</sub>                 |
| Li <sub>4</sub> Co <sub>3</sub> Ni <sub>5</sub> O <sub>16</sub>                  | 3.57 | K3.57 | K3.57Li <sub>4</sub> Co <sub>3</sub> Ni <sub>5</sub> O <sub>16</sub>                  |
| Li <sub>4</sub> Co <sub>5</sub> Ni <sub>3</sub> O <sub>16</sub>                  | 3.53 | K3.53 | K3.53Li <sub>4</sub> Co <sub>5</sub> Ni <sub>3</sub> O <sub>16</sub>                  |
| Li <sub>4</sub> Co <sub>5</sub> O <sub>12</sub>                                  | 1.89 | K1.89 | K1.89Li <sub>4</sub> Co <sub>5</sub> O <sub>12</sub>                                  |
| Li <sub>4</sub> Co <sub>7</sub> O <sub>16</sub>                                  | 3.1  | K3.1  | K3.1Li <sub>4</sub> Co <sub>7</sub> O <sub>16</sub>                                   |
| Li <sub>4</sub> CoCu <sub>3</sub> (PO <sub>4</sub> ) <sub>4</sub>                | 2.85 | K2.85 | K2.85Li <sub>4</sub> CoCu <sub>3</sub> (PO <sub>4</sub> ) <sub>4</sub>                |
| Li <sub>4</sub> CoO <sub>4</sub>                                                 | 0.83 | K0.83 | K0.83Li <sub>4</sub> CoO <sub>4</sub>                                                 |
| Li <sub>4</sub> CoO <sub>4</sub>                                                 | 0.91 | K0.91 | K0.91Li <sub>4</sub> CoO <sub>4</sub>                                                 |
| Li <sub>4</sub> Cr <sub>2</sub> C <sub>4</sub> S <sub>2</sub> O <sub>16</sub>    | 1.83 | K1.83 | K1.83Li <sub>4</sub> Cr <sub>2</sub> C <sub>4</sub> S <sub>2</sub> O <sub>16</sub>    |
| Li <sub>4</sub> Cr <sub>2</sub> Fe <sub>3</sub> Co <sub>3</sub> O <sub>16</sub>  | 3.59 | K3.59 | K3.59Li <sub>4</sub> Cr <sub>2</sub> Fe <sub>3</sub> Co <sub>3</sub> O <sub>16</sub>  |
| Li <sub>4</sub> Cr <sub>2</sub> Ni <sub>5</sub> O <sub>12</sub>                  | 1.81 | K1.81 | K1.81Li <sub>4</sub> Cr <sub>2</sub> Ni <sub>5</sub> O <sub>12</sub>                  |
| Li <sub>4</sub> Cr <sub>3</sub> (FeO <sub>4</sub> ) <sub>3</sub>                 | 2.35 | K2.35 | K2.35Li <sub>4</sub> Cr <sub>3</sub> (FeO <sub>4</sub> ) <sub>3</sub>                 |
| Li <sub>4</sub> Fe <sub>2</sub> C <sub>4</sub> S <sub>2</sub> O <sub>16</sub>    | 1.93 | K1.93 | K1.93Li <sub>4</sub> Fe <sub>2</sub> C <sub>4</sub> S <sub>2</sub> O <sub>16</sub>    |
| Li <sub>4</sub> Fe <sub>2</sub> Co <sub>3</sub> Ni <sub>3</sub> O <sub>16</sub>  | 3.46 | K3.46 | K3.46Li <sub>4</sub> Fe <sub>2</sub> Co <sub>3</sub> Ni <sub>3</sub> O <sub>16</sub>  |
| Li <sub>4</sub> Fe <sub>2</sub> Ni <sub>5</sub> O <sub>12</sub>                  | 1.66 | K1.66 | K1.66Li <sub>4</sub> Fe <sub>2</sub> Ni <sub>5</sub> O <sub>12</sub>                  |
| Li <sub>4</sub> Fe <sub>3</sub> (NiO <sub>4</sub> ) <sub>3</sub>                 | 1.79 | K1.79 | K1.79Li <sub>4</sub> Fe <sub>3</sub> (NiO <sub>4</sub> ) <sub>3</sub>                 |
| Li <sub>4</sub> Fe <sub>3</sub> (NiO <sub>5</sub> ) <sub>2</sub>                 | 1.23 | K1.23 | K1.23Li <sub>4</sub> Fe <sub>3</sub> (NiO <sub>5</sub> ) <sub>2</sub>                 |
| Li <sub>4</sub> Fe <sub>3</sub> Co <sub>2</sub> Ni <sub>3</sub> O <sub>16</sub>  | 3.35 | K3.35 | K3.35Li <sub>4</sub> Fe <sub>3</sub> Co <sub>2</sub> Ni <sub>3</sub> O <sub>16</sub>  |
| Li <sub>4</sub> Fe <sub>3</sub> Co <sub>3</sub> (NiO <sub>8</sub> ) <sub>2</sub> | 3.37 | K3.37 | K3.37Li <sub>4</sub> Fe <sub>3</sub> Co <sub>3</sub> (NiO <sub>8</sub> ) <sub>2</sub> |
| Li <sub>4</sub> Fe <sub>5</sub> NiO <sub>12</sub>                                | 1.59 | K1.59 | K1.59Li <sub>4</sub> Fe <sub>5</sub> NiO <sub>12</sub>                                |
| Li <sub>4</sub> Fe <sub>9</sub> CoO <sub>20</sub>                                | 4.76 | K4.76 | K4.76Li <sub>4</sub> Fe <sub>9</sub> CoO <sub>20</sub>                                |
| Li <sub>4</sub> FeCo <sub>3</sub> O <sub>8</sub>                                 | 2    | K2    | K2Li <sub>4</sub> FeCo <sub>3</sub> O <sub>8</sub>                                    |
| Li <sub>4</sub> FeOF <sub>5</sub>                                                | 1.19 | K1.19 | K1.19Li <sub>4</sub> FeOF <sub>5</sub>                                                |
| Li <sub>4</sub> Mn(Ni <sub>2</sub> O <sub>5</sub> ) <sub>2</sub>                 | 1.29 | K1.29 | K1.29Li <sub>4</sub> Mn(Ni <sub>2</sub> O <sub>5</sub> ) <sub>2</sub>                 |

|                                                                                  |      |       |                                                                                       |
|----------------------------------------------------------------------------------|------|-------|---------------------------------------------------------------------------------------|
| Li <sub>4</sub> Mn <sub>2</sub> Co <sub>3</sub> O <sub>10</sub>                  | 1.26 | K1.26 | K1.26Li <sub>4</sub> Mn <sub>2</sub> Co <sub>3</sub> O <sub>10</sub>                  |
| Li <sub>4</sub> Mn <sub>2</sub> Fe <sub>3</sub> Ni <sub>3</sub> O <sub>16</sub>  | 3.1  | K3.1  | K3.1Li <sub>4</sub> Mn <sub>2</sub> Fe <sub>3</sub> Ni <sub>3</sub> O <sub>16</sub>   |
| Li <sub>4</sub> Mn <sub>2</sub> Ni <sub>3</sub> O <sub>10</sub>                  | 1.32 | K1.32 | K1.32Li <sub>4</sub> Mn <sub>2</sub> Ni <sub>3</sub> O <sub>10</sub>                  |
| Li <sub>4</sub> Mn <sub>2</sub> V <sub>3</sub> Cr <sub>3</sub> O <sub>16</sub>   | 3.3  | K3.3  | K3.3Li <sub>4</sub> Mn <sub>2</sub> V <sub>3</sub> Cr <sub>3</sub> O <sub>16</sub>    |
| Li <sub>4</sub> Mn <sub>3</sub> (NiO <sub>4</sub> ) <sub>3</sub>                 | 1.7  | K1.7  | K1.7Li <sub>4</sub> Mn <sub>3</sub> (NiO <sub>4</sub> ) <sub>3</sub>                  |
| Li <sub>4</sub> Mn <sub>3</sub> (SnO <sub>5</sub> ) <sub>2</sub>                 | 1.33 | K1.33 | K1.33Li <sub>4</sub> Mn <sub>3</sub> (SnO <sub>5</sub> ) <sub>2</sub>                 |
| Li <sub>4</sub> Mn <sub>3</sub> Co <sub>2</sub> Ni <sub>3</sub> O <sub>16</sub>  | 2.77 | K2.77 | K2.77Li <sub>4</sub> Mn <sub>3</sub> Co <sub>2</sub> Ni <sub>3</sub> O <sub>16</sub>  |
| Li <sub>4</sub> Mn <sub>3</sub> Cr <sub>2</sub> Fe <sub>3</sub> O <sub>16</sub>  | 3.14 | K3.14 | K3.14Li <sub>4</sub> Mn <sub>3</sub> Cr <sub>2</sub> Fe <sub>3</sub> O <sub>16</sub>  |
| Li <sub>4</sub> Mn <sub>3</sub> Cr <sub>2</sub> O <sub>10</sub>                  | 1.83 | K1.83 | K1.83Li <sub>4</sub> Mn <sub>3</sub> Cr <sub>2</sub> O <sub>10</sub>                  |
| Li <sub>4</sub> Mn <sub>3</sub> Cr <sub>3</sub> (FeO <sub>8</sub> ) <sub>2</sub> | 2.72 | K2.72 | K2.72Li <sub>4</sub> Mn <sub>3</sub> Cr <sub>3</sub> (FeO <sub>8</sub> ) <sub>2</sub> |
| Li <sub>4</sub> Mn <sub>3</sub> Cr <sub>3</sub> (NiO <sub>8</sub> ) <sub>2</sub> | 2.99 | K2.99 | K2.99Li <sub>4</sub> Mn <sub>3</sub> Cr <sub>3</sub> (NiO <sub>8</sub> ) <sub>2</sub> |
| Li <sub>4</sub> Mn <sub>3</sub> V <sub>5</sub> O <sub>16</sub>                   | 2.97 | K2.97 | K2.97Li <sub>4</sub> Mn <sub>3</sub> V <sub>5</sub> O <sub>16</sub>                   |
| Li <sub>4</sub> Mn <sub>5</sub> (NiO <sub>6</sub> ) <sub>2</sub>                 | 1.47 | K1.47 | K1.47Li <sub>4</sub> Mn <sub>5</sub> (NiO <sub>6</sub> ) <sub>2</sub>                 |
| Li <sub>4</sub> Mn <sub>5</sub> Ni <sub>3</sub> O <sub>16</sub>                  | 3.17 | K3.17 | K3.17Li <sub>4</sub> Mn <sub>5</sub> Ni <sub>3</sub> O <sub>16</sub>                  |
| Li <sub>4</sub> Mn <sub>5</sub> O <sub>10</sub>                                  | 1.57 | K1.57 | K1.57Li <sub>4</sub> Mn <sub>5</sub> O <sub>10</sub>                                  |
| Li <sub>4</sub> Mn <sub>5</sub> SbO <sub>12</sub>                                | 1.56 | K1.56 | K1.56Li <sub>4</sub> Mn <sub>5</sub> SbO <sub>12</sub>                                |
| Li <sub>4</sub> Mn <sub>7</sub> O <sub>16</sub>                                  | 2.76 | K2.76 | K2.76Li <sub>4</sub> Mn <sub>7</sub> O <sub>16</sub>                                  |
| Li <sub>4</sub> NbFe <sub>5</sub> O <sub>12</sub>                                | 1.75 | K1.75 | K1.75Li <sub>4</sub> NbFe <sub>5</sub> O <sub>12</sub>                                |
| Li <sub>4</sub> Ni <sub>3</sub> (SnO <sub>5</sub> ) <sub>2</sub>                 | 1.35 | K1.35 | K1.35Li <sub>4</sub> Ni <sub>3</sub> (SnO <sub>5</sub> ) <sub>2</sub>                 |
| Li <sub>4</sub> Ti <sub>11</sub> O <sub>24</sub>                                 | 3.25 | K3.25 | K3.25Li <sub>4</sub> Ti <sub>11</sub> O <sub>24</sub>                                 |
| Li <sub>4</sub> Ti <sub>15</sub> O <sub>32</sub>                                 | 2.2  | K2.2  | K2.2Li <sub>4</sub> Ti <sub>15</sub> O <sub>32</sub>                                  |
| Li <sub>4</sub> Ti <sub>2</sub> Fe <sub>3</sub> Co <sub>3</sub> O <sub>16</sub>  | 3.14 | K3.14 | K3.14Li <sub>4</sub> Ti <sub>2</sub> Fe <sub>3</sub> Co <sub>3</sub> O <sub>16</sub>  |
| Li <sub>4</sub> Ti <sub>2</sub> Fe <sub>3</sub> Ni <sub>3</sub> O <sub>16</sub>  | 3.03 | K3.03 | K3.03Li <sub>4</sub> Ti <sub>2</sub> Fe <sub>3</sub> Ni <sub>3</sub> O <sub>16</sub>  |
| Li <sub>4</sub> Ti <sub>2</sub> Fe <sub>5</sub> O <sub>12</sub>                  | 1.58 | K1.58 | K1.58Li <sub>4</sub> Ti <sub>2</sub> Fe <sub>5</sub> O <sub>12</sub>                  |

|                                                                                  |      |       |                                                                                       |
|----------------------------------------------------------------------------------|------|-------|---------------------------------------------------------------------------------------|
| Li <sub>4</sub> Ti <sub>2</sub> Mn <sub>3</sub> Ni <sub>3</sub> O <sub>16</sub>  | 2.39 | K2.39 | K2.39Li <sub>4</sub> Ti <sub>2</sub> Mn <sub>3</sub> Ni <sub>3</sub> O <sub>16</sub>  |
| Li <sub>4</sub> Ti <sub>2</sub> Ni <sub>3</sub> O <sub>10</sub>                  | 1.2  | K1.2  | K1.2Li <sub>4</sub> Ti <sub>2</sub> Ni <sub>3</sub> O <sub>10</sub>                   |
| Li <sub>4</sub> Ti <sub>2</sub> V <sub>5</sub> O <sub>12</sub>                   | 1.27 | K1.27 | K1.27Li <sub>4</sub> Ti <sub>2</sub> V <sub>5</sub> O <sub>12</sub>                   |
| Li <sub>4</sub> Ti <sub>3</sub> (CoO <sub>4</sub> ) <sub>3</sub>                 | 1.55 | K1.55 | K1.55Li <sub>4</sub> Ti <sub>3</sub> (CoO <sub>4</sub> ) <sub>3</sub>                 |
| Li <sub>4</sub> Ti <sub>3</sub> (FeO <sub>4</sub> ) <sub>3</sub>                 | 1.66 | K1.66 | K1.66Li <sub>4</sub> Ti <sub>3</sub> (FeO <sub>4</sub> ) <sub>3</sub>                 |
| Li <sub>4</sub> Ti <sub>3</sub> Co <sub>3</sub> (NiO <sub>8</sub> ) <sub>2</sub> | 2.85 | K2.85 | K2.85Li <sub>4</sub> Ti <sub>3</sub> Co <sub>3</sub> (NiO <sub>8</sub> ) <sub>2</sub> |
| Li <sub>4</sub> Ti <sub>3</sub> O <sub>8</sub>                                   | 1.28 | K1.28 | K1.28Li <sub>4</sub> Ti <sub>3</sub> O <sub>8</sub>                                   |
| Li <sub>4</sub> Ti <sub>9</sub> O <sub>20</sub>                                  | 2.63 | K2.63 | K2.63Li <sub>4</sub> Ti <sub>9</sub> O <sub>20</sub>                                  |
| Li <sub>4</sub> TiFe <sub>5</sub> O <sub>12</sub>                                | 1.65 | K1.65 | K1.65Li <sub>4</sub> TiFe <sub>5</sub> O <sub>12</sub>                                |
| Li <sub>4</sub> V(CO <sub>3</sub> ) <sub>4</sub>                                 | 1.17 | K1.17 | K1.17Li <sub>4</sub> V(CO <sub>3</sub> ) <sub>4</sub>                                 |
| Li <sub>4</sub> V <sub>11</sub> O <sub>22</sub>                                  | 3.37 | K3.37 | K3.37Li <sub>4</sub> V <sub>11</sub> O <sub>22</sub>                                  |
| Li <sub>4</sub> V <sub>2</sub> C <sub>4</sub> S <sub>16</sub> O <sub>16</sub>    | 1.55 | K1.55 | K1.55Li <sub>4</sub> V <sub>2</sub> C <sub>4</sub> S <sub>16</sub> O <sub>16</sub>    |
| Li <sub>4</sub> V <sub>2</sub> Fe <sub>5</sub> O <sub>12</sub>                   | 1.35 | K1.35 | K1.35Li <sub>4</sub> V <sub>2</sub> Fe <sub>5</sub> O <sub>12</sub>                   |
| Li <sub>4</sub> V <sub>3</sub> Cr <sub>3</sub> O <sub>12</sub>                   | 2.19 | K2.19 | K2.19Li <sub>4</sub> V <sub>3</sub> Cr <sub>3</sub> O <sub>12</sub>                   |
| Li <sub>4</sub> V <sub>3</sub> Cr <sub>5</sub> O <sub>16</sub>                   | 3.66 | K3.66 | K3.66Li <sub>4</sub> V <sub>3</sub> Cr <sub>5</sub> O <sub>16</sub>                   |
| Li <sub>4</sub> V <sub>5</sub> (FeO <sub>6</sub> ) <sub>2</sub>                  | 1.64 | K1.64 | K1.64Li <sub>4</sub> V <sub>5</sub> (FeO <sub>6</sub> ) <sub>2</sub>                  |
| Li <sub>4</sub> V <sub>5</sub> Cr <sub>3</sub> O <sub>16</sub>                   | 3.32 | K3.32 | K3.32Li <sub>4</sub> V <sub>5</sub> Cr <sub>3</sub> O <sub>16</sub>                   |
| Li <sub>4</sub> V <sub>5</sub> O <sub>9</sub> F                                  | 1.24 | K1.24 | K1.24Li <sub>4</sub> V <sub>5</sub> O <sub>9</sub> F                                  |
| Li <sub>4</sub> VO <sub>4</sub> F                                                | 1.03 | K1.03 | K1.03Li <sub>4</sub> VO <sub>4</sub> F                                                |
| Li <sub>4</sub> VP <sub>2</sub> (O <sub>4</sub> F) <sub>2</sub>                  | 1.28 | K1.28 | K1.28Li <sub>4</sub> VP <sub>2</sub> (O <sub>4</sub> F) <sub>2</sub>                  |
| Li <sub>5</sub> (CoO <sub>3</sub> ) <sub>2</sub>                                 | 1.53 | K1.53 | K1.53Li <sub>5</sub> (CoO <sub>3</sub> ) <sub>2</sub>                                 |
| Li <sub>5</sub> Co <sub>4</sub> (Si <sub>3</sub> O <sub>10</sub> ) <sub>2</sub>  | 3.26 | K3.26 | K3.26Li <sub>5</sub> Co <sub>4</sub> (Si <sub>3</sub> O <sub>10</sub> ) <sub>2</sub>  |
| Li <sub>5</sub> CoNi <sub>9</sub> O <sub>20</sub>                                | 3.86 | K3.86 | K3.86Li <sub>5</sub> CoNi <sub>9</sub> O <sub>20</sub>                                |
| Li <sub>5</sub> Cr <sub>5</sub> O <sub>12</sub>                                  | 1.89 | K1.89 | K1.89Li <sub>5</sub> Cr <sub>5</sub> O <sub>12</sub>                                  |

|                |      |       |                     |
|----------------|------|-------|---------------------|
| Li5Fe2P2(CO7)2 | 1.63 | K1.63 | K1.63Li5Fe2P2(CO7)2 |
| Li5Fe5O12      | 2.15 | K2.15 | K2.15Li5Fe5O12      |
| Li5FeS4        | 1    | K1    | K1Li5FeS4           |
| Li5La3(SbO6)2  | 1.99 | K1.99 | K1.99Li5La3(SbO6)2  |
| Li5La3Nb2O12   | 2.09 | K2.09 | K2.09Li5La3Nb2O12   |
| Li5La4TiNb7O28 | 3    | K3    | K3Li5La4TiNb7O28    |
| Li5Mn2P2(CO7)2 | 1.53 | K1.53 | K1.53Li5Mn2P2(CO7)2 |
| Li5Mn5O12      | 1.98 | K1.98 | K1.98Li5Mn5O12      |
| Li5Mn6O16      | 2.58 | K2.58 | K2.58Li5Mn6O16      |
| Li5Mn8(BO3)8   | 2.75 | K2.75 | K2.75Li5Mn8(BO3)8   |
| Li5MnO4        | 0.87 | K0.87 | K0.87Li5MnO4        |
| Li5Ni9O16      | 3.6  | K3.6  | K3.6Li5Ni9O16       |
| Li5NiO4        | 0.79 | K0.79 | K0.79Li5NiO4        |
| Li5V2OF11      | 1.05 | K1.05 | K1.05Li5V2OF11      |
| Li5VF8         | 1.14 | K1.14 | K1.14Li5VF8         |
| Li6(CoO2)5     | 2.8  | K2.8  | K2.8Li6(CoO2)5      |
| Li6CrFe3(PO4)6 | 3.16 | K3.16 | K3.16Li6CrFe3(PO4)6 |
| Li6CrO6        | 1.07 | K1.07 | K1.07Li6CrO6        |
| Li6CuO4        | 0.84 | K0.84 | K0.84Li6CuO4        |
| Li6Fe3Co(PO4)6 | 3.09 | K3.09 | K3.09Li6Fe3Co(PO4)6 |
| Li6Fe3Sn(PO4)6 | 2.37 | K2.37 | K2.37Li6Fe3Sn(PO4)6 |
| Li6FeCo3(PO4)6 | 3.13 | K3.13 | K3.13Li6FeCo3(PO4)6 |
| Li6FeNi9O20    | 3.27 | K3.27 | K3.27Li6FeNi9O20    |
| Li6FeO5F       | 1.31 | K1.31 | K1.31Li6FeO5F       |

|                |      |       |                     |
|----------------|------|-------|---------------------|
| Li6FeO6        | 1.28 | K1.28 | K1.28Li6FeO6        |
| Li6Mg(Ni6O13)2 | 4    | K4    | K4Li6Mg(Ni6O13)2    |
| Li6Mn17O40     | 6.16 | K6.16 | K6.16Li6Mn17O40     |
| Li6MnCo3(PO4)6 | 3.21 | K3.21 | K3.21Li6MnCo3(PO4)6 |
| Li6MnNi7O16    | 2.34 | K2.34 | K2.34Li6MnNi7O16    |
| Li6NbNi3(PO4)6 | 1.93 | K1.93 | K1.93Li6NbNi3(PO4)6 |
| Li6Sn3P8O29    | 3.45 | K3.45 | K3.45Li6Sn3P8O29    |
| Li6TiNi7O16    | 3.09 | K3.09 | K3.09Li6TiNi7O16    |
| Li6VO5F        | 1.26 | K1.26 | K1.26Li6VO5F        |
| Li7(CoO3)2     | 1.34 | K1.34 | K1.34Li7(CoO3)2     |
| Li7(SnO3)4     | 2.37 | K2.37 | K2.37Li7(SnO3)4     |
| Li7BiO6        | 1.03 | K1.03 | K1.03Li7BiO6        |
| Li7Fe5O16      | 2.84 | K2.84 | K2.84Li7Fe5O16      |
| Li7Mn(O2F)2    | 1.02 | K1.02 | K1.02Li7Mn(O2F)2    |
| Li7NbO6        | 0.92 | K0.92 | K0.92Li7NbO6        |
| Li7Ni(O2F)2    | 1    | K1    | K1Li7Ni(O2F)2       |
| Li7Ni13O24     | 4.31 | K4.31 | K4.31Li7Ni13O24     |
| Li7Ti12NbO30   | 0.83 | K0.83 | K0.83Li7Ti12NbO30   |
| Li7Ti7Nb5O30   | 3.41 | K3.41 | K3.41Li7Ti7Nb5O30   |
| Li7V16(PO4)24  | 5.74 | K5.74 | K5.74Li7V16(PO4)24  |
| Li7VO5F        | 1.14 | K1.14 | K1.14Li7VO5F        |
| Li8(CoO2)5     | 3.1  | K3.1  | K3.1Li8(CoO2)5      |
| Li8(FeO2)5     | 2.9  | K2.9  | K2.9Li8(FeO2)5      |
| Li8CoNi9O20    | 2.76 | K2.76 | K2.76Li8CoNi9O20    |

|                                                                   |      |       |                                                                        |
|-------------------------------------------------------------------|------|-------|------------------------------------------------------------------------|
| Li <sub>8</sub> Fe <sub>3</sub> Ni <sub>7</sub> O <sub>20</sub>   | 2.74 | K2.74 | K2.74Li <sub>8</sub> Fe <sub>3</sub> Ni <sub>7</sub> O <sub>20</sub>   |
| Li <sub>8</sub> TiMn <sub>3</sub> (PO <sub>4</sub> ) <sub>6</sub> | 2.44 | K2.44 | K2.44Li <sub>8</sub> TiMn <sub>3</sub> (PO <sub>4</sub> ) <sub>6</sub> |
| Li <sub>9</sub> (FeO <sub>4</sub> ) <sub>2</sub>                  | 1.66 | K1.66 | K1.66Li <sub>9</sub> (FeO <sub>4</sub> ) <sub>2</sub>                  |
| Li <sub>9</sub> (NiO <sub>4</sub> ) <sub>2</sub>                  | 1.25 | K1.25 | K1.25Li <sub>9</sub> (NiO <sub>4</sub> ) <sub>2</sub>                  |
| Li <sub>9</sub> Cr <sub>4</sub> (BO <sub>3</sub> ) <sub>8</sub>   | 1.63 | K1.63 | K1.63Li <sub>9</sub> Cr <sub>4</sub> (BO <sub>3</sub> ) <sub>8</sub>   |
| Li <sub>9</sub> Cu <sub>2</sub> (HO <sub>2</sub> ) <sub>4</sub>   | 1.16 | K1.16 | K1.16Li <sub>9</sub> Cu <sub>2</sub> (HO <sub>2</sub> ) <sub>4</sub>   |
| Li <sub>9</sub> Fe <sub>4</sub> (BO <sub>3</sub> ) <sub>8</sub>   | 1.66 | K1.66 | K1.66Li <sub>9</sub> Fe <sub>4</sub> (BO <sub>3</sub> ) <sub>8</sub>   |
| Li <sub>9</sub> La <sub>12</sub> (SnO <sub>6</sub> ) <sub>8</sub> | 4.72 | K4.72 | K4.72Li <sub>9</sub> La <sub>12</sub> (SnO <sub>6</sub> ) <sub>8</sub> |
| Li <sub>9</sub> Ni <sub>15</sub> O <sub>28</sub>                  | 3.81 | K3.81 | K3.81Li <sub>9</sub> Ni <sub>15</sub> O <sub>28</sub>                  |
| LiAl <sub>2</sub> FeO <sub>6</sub>                                | 1.5  | K1.5  | K1.5LiAl <sub>2</sub> FeO <sub>6</sub>                                 |
| LiAlVO <sub>4</sub>                                               | 0.92 | K0.92 | K0.92LiAlVO <sub>4</sub>                                               |
| LiCa <sub>2</sub> Nb <sub>3</sub> O <sub>10</sub>                 | 1.87 | K1.87 | K1.87LiCa <sub>2</sub> Nb <sub>3</sub> O <sub>10</sub>                 |
| LiCdSb                                                            | 0.96 | K0.96 | K0.96LiCdSb                                                            |
| LiCeSn                                                            | 0.91 | K0.91 | K0.91LiCeSn                                                            |
| LiCo(CO <sub>3</sub> ) <sub>2</sub>                               | 1.02 | K1.02 | K1.02LiCo(CO <sub>3</sub> ) <sub>2</sub>                               |
| LiCo(SiO <sub>3</sub> ) <sub>2</sub>                              | 1.34 | K1.34 | K1.34LiCo(SiO <sub>3</sub> ) <sub>2</sub>                              |
| LiCo <sub>2</sub> (BO <sub>3</sub> ) <sub>2</sub>                 | 1.23 | K1.23 | K1.23LiCo <sub>2</sub> (BO <sub>3</sub> ) <sub>2</sub>                 |
| LiCo <sub>2</sub> CuO <sub>6</sub>                                | 1.5  | K1.5  | K1.5LiCo <sub>2</sub> CuO <sub>6</sub>                                 |
| LiCo <sub>3</sub> (SiO <sub>4</sub> ) <sub>2</sub>                | 1.69 | K1.69 | K1.69LiCo <sub>3</sub> (SiO <sub>4</sub> ) <sub>2</sub>                |
| LiCo <sub>3</sub> CuO <sub>8</sub>                                | 2.03 | K2.03 | K2.03LiCo <sub>3</sub> CuO <sub>8</sub>                                |
| LiCoCO <sub>4</sub>                                               | 0.83 | K0.83 | K0.83LiCoCO <sub>4</sub>                                               |
| LiCoCuO <sub>4</sub>                                              | 1    | K1    | K1LiCoCuO <sub>4</sub>                                                 |
| LiCoGeO <sub>4</sub>                                              | 1.16 | K1.16 | K1.16LiCoGeO <sub>4</sub>                                              |
| LiCoH <sub>8</sub> (CO <sub>5</sub> ) <sub>2</sub>                | 1.36 | K1.36 | K1.36LiCoH <sub>8</sub> (CO <sub>5</sub> ) <sub>2</sub>                |

|              |      |       |                   |
|--------------|------|-------|-------------------|
| LiCoH8(SO6)2 | 1.64 | K1.64 | K1.64LiCoH8(SO6)2 |
| LiCoNiO4     | 0.98 | K0.98 | K0.98LiCoNiO4     |
| LiCoP2O7     | 1.3  | K1.3  | K1.3LiCoP2O7      |
| LiCoPO4F     | 0.9  | K0.9  | K0.9LiCoPO4F      |
| LiCoSiO4     | 0.96 | K0.96 | K0.96LiCoSiO4     |
| LiCoSnO4     | 1.22 | K1.22 | K1.22LiCoSnO4     |
| LiCr(Si2O5)2 | 1.59 | K1.59 | K1.59LiCr(Si2O5)2 |
| LiCr(Si2O5)3 | 2.07 | K2.07 | K2.07LiCr(Si2O5)3 |
| LiCr2(CO3)4  | 1.94 | K1.94 | K1.94LiCr2(CO3)4  |
| LiCr2(PO4)2  | 1.46 | K1.46 | K1.46LiCr2(PO4)2  |
| LiCr2(PO4)2  | 1.53 | K1.53 | K1.53LiCr2(PO4)2  |
| LiCr2CoO6    | 1.75 | K1.75 | K1.75LiCr2CoO6    |
| LiCr2O4      | 1.09 | K1.09 | K1.09LiCr2O4      |
| LiCrAsCO7    | 1.49 | K1.49 | K1.49LiCrAsCO7    |
| LiCrCoO4     | 1.16 | K1.16 | K1.16LiCrCoO4     |
| LiCrCSO7     | 1.34 | K1.34 | K1.34LiCrCSO7     |
| LiCrFeO4     | 1.14 | K1.14 | K1.14LiCrFeO4     |
| LiCrNiO4     | 1.07 | K1.07 | K1.07LiCrNiO4     |
| LiCrP2O7     | 1.26 | K1.26 | K1.26LiCrP2O7     |
| LiCrPO4F     | 0.93 | K0.93 | K0.93LiCrPO4F     |
| LiCu(HO)4    | 0.84 | K0.84 | K0.84LiCu(HO)4    |
| LiCu(PO3)4   | 1.74 | K1.74 | K1.74LiCu(PO3)4   |
| LiCu2(CO3)2  | 1.26 | K1.26 | K1.26LiCu2(CO3)2  |
| LiCu2C2O7    | 1.29 | K1.29 | K1.29LiCu2C2O7    |



|                                                    |      |       |                                                         |
|----------------------------------------------------|------|-------|---------------------------------------------------------|
| LiCu <sub>2</sub> F <sub>6</sub>                   | 1.12 | K1.12 | K1.12LiCu <sub>2</sub> F <sub>6</sub>                   |
| LiCu <sub>2</sub> P <sub>5</sub> O <sub>16</sub>   | 2.81 | K2.81 | K2.81LiCu <sub>2</sub> P <sub>5</sub> O <sub>16</sub>   |
| LiCu <sub>3</sub> (CO <sub>3</sub> ) <sub>3</sub>  | 1.55 | K1.55 | K1.55LiCu <sub>3</sub> (CO <sub>3</sub> ) <sub>3</sub>  |
| LiCu <sub>5</sub> F <sub>12</sub>                  | 1.77 | K1.77 | K1.77LiCu <sub>5</sub> F <sub>12</sub>                  |
| LiCuBO <sub>3</sub>                                | 0.64 | K0.64 | K0.64LiCuBO <sub>3</sub>                                |
| LiCuF <sub>4</sub>                                 | 0.88 | K0.88 | K0.88LiCuF <sub>4</sub>                                 |
| LiCuO <sub>2</sub>                                 | 0.53 | K0.53 | K0.53LiCuO <sub>2</sub>                                 |
| LiCuP <sub>2</sub> O <sub>7</sub>                  | 1.22 | K1.22 | K1.22LiCuP <sub>2</sub> O <sub>7</sub>                  |
| LiCuPCO <sub>7</sub>                               | 1.3  | K1.3  | K1.3LiCuPCO <sub>7</sub>                                |
| LiCuPO <sub>4</sub>                                | 1.01 | K1.01 | K1.01LiCuPO <sub>4</sub>                                |
| LiFe(SiO <sub>3</sub> ) <sub>2</sub>               | 1.38 | K1.38 | K1.38LiFe(SiO <sub>3</sub> ) <sub>2</sub>               |
| LiFe(SO <sub>4</sub> ) <sub>2</sub>                | 1.4  | K1.4  | K1.4LiFe(SO <sub>4</sub> ) <sub>2</sub>                 |
| LiFe <sub>2</sub> (CO <sub>3</sub> ) <sub>3</sub>  | 1.54 | K1.54 | K1.54LiFe <sub>2</sub> (CO <sub>3</sub> ) <sub>3</sub>  |
| LiFe <sub>2</sub> (CO <sub>3</sub> ) <sub>4</sub>  | 1.88 | K1.88 | K1.88LiFe <sub>2</sub> (CO <sub>3</sub> ) <sub>4</sub>  |
| LiFe <sub>2</sub> (CoO <sub>4</sub> ) <sub>2</sub> | 2.34 | K2.34 | K2.34LiFe <sub>2</sub> (CoO <sub>4</sub> ) <sub>2</sub> |
| LiFe <sub>2</sub> (PO <sub>4</sub> ) <sub>2</sub>  | 1.61 | K1.61 | K1.61LiFe <sub>2</sub> (PO <sub>4</sub> ) <sub>2</sub>  |
| LiFe <sub>2</sub> (PO <sub>4</sub> ) <sub>3</sub>  | 2.13 | K2.13 | K2.13LiFe <sub>2</sub> (PO <sub>4</sub> ) <sub>3</sub>  |
| LiFe <sub>2</sub> C <sub>2</sub> O <sub>7</sub>    | 1.17 | K1.17 | K1.17LiFe <sub>2</sub> C <sub>2</sub> O <sub>7</sub>    |
| LiFe <sub>2</sub> Si <sub>2</sub> O <sub>7</sub>   | 1.41 | K1.41 | K1.41LiFe <sub>2</sub> Si <sub>2</sub> O <sub>7</sub>   |
| LiFe <sub>3</sub> (OF <sub>3</sub> ) <sub>2</sub>  | 2.24 | K2.24 | K2.24LiFe <sub>3</sub> (OF <sub>3</sub> ) <sub>2</sub>  |
| LiFe <sub>4</sub> (BO <sub>3</sub> ) <sub>4</sub>  | 1.32 | K1.32 | K1.32LiFe <sub>4</sub> (BO <sub>3</sub> ) <sub>4</sub>  |
| LiFe <sub>8</sub> (BO <sub>3</sub> ) <sub>8</sub>  | 3.07 | K3.07 | K3.07LiFe <sub>8</sub> (BO <sub>3</sub> ) <sub>8</sub>  |
| LiFeAsCO <sub>7</sub>                              | 1.67 | K1.67 | K1.67LiFeAsCO <sub>7</sub>                              |
| LiFeCO <sub>4</sub>                                | 0.87 | K0.87 | K0.87LiFeCO <sub>4</sub>                                |

|              |      |       |                   |
|--------------|------|-------|-------------------|
| LiFeCuO4     | 0.91 | K0.91 | K0.91LiFeCuO4     |
| LiFeF4       | 0.89 | K0.89 | K0.89LiFeF4       |
| LiFeH8(SO6)2 | 1.53 | K1.53 | K1.53LiFeH8(SO6)2 |
| LiFeNiO4     | 0.93 | K0.93 | K0.93LiFeNiO4     |
| LiFeO3       | 0.69 | K0.69 | K0.69LiFeO3       |
| LiFeP2O7     | 1.16 | K1.16 | K1.16LiFeP2O7     |
| LiFePCO7     | 1.56 | K1.56 | K1.56LiFePCO7     |
| LiFeS2       | 0.84 | K0.84 | K0.84LiFeS2       |
| LiFeSiO4     | 0.85 | K0.85 | K0.85LiFeSiO4     |
| LiFeSnO4     | 1.17 | K1.17 | K1.17LiFeSnO4     |
| LiLa2Nb8O24  | 3.03 | K3.03 | K3.03LiLa2Nb8O24  |
| LiLa5Ti8O24  | 2.91 | K2.91 | K2.91LiLa5Ti8O24  |
| LiLa7(CuO7)2 | 3.01 | K3.01 | K3.01LiLa7(CuO7)2 |
| LiLaNb4O12   | 2.89 | K2.89 | K2.89LiLaNb4O12   |
| LiMn(PO4)2   | 1.41 | K1.41 | K1.41LiMn(PO4)2   |
| LiMn(SO4)2   | 1.34 | K1.34 | K1.34LiMn(SO4)2   |
| LiMn2(BO3)2  | 1.28 | K1.28 | K1.28LiMn2(BO3)2  |
| LiMn2(CO3)4  | 2.17 | K2.17 | K2.17LiMn2(CO3)4  |
| LiMn2(CO4)2  | 1.33 | K1.33 | K1.33LiMn2(CO4)2  |
| LiMn2(P2O7)2 | 1.94 | K1.94 | K1.94LiMn2(P2O7)2 |
| LiMn2(PO4)2  | 1.32 | K1.32 | K1.32LiMn2(PO4)2  |
| LiMn2(PO4)3  | 2.12 | K2.12 | K2.12LiMn2(PO4)3  |
| LiMn2(PO5)2  | 1.56 | K1.56 | K1.56LiMn2(PO5)2  |
| LiMn2Cr2O8   | 1.92 | K1.92 | K1.92LiMn2Cr2O8   |

|                                                    |      |       |                                                         |
|----------------------------------------------------|------|-------|---------------------------------------------------------|
| LiMn <sub>2</sub> NiO <sub>6</sub>                 | 1.67 | K1.67 | K1.67LiMn <sub>2</sub> NiO <sub>6</sub>                 |
| LiMn <sub>3</sub> (BO <sub>3</sub> ) <sub>3</sub>  | 1.38 | K1.38 | K1.38LiMn <sub>3</sub> (BO <sub>3</sub> ) <sub>3</sub>  |
| LiMn <sub>3</sub> (OF <sub>3</sub> ) <sub>2</sub>  | 2.21 | K2.21 | K2.21LiMn <sub>3</sub> (OF <sub>3</sub> ) <sub>2</sub>  |
| LiMn <sub>3</sub> (PO <sub>4</sub> ) <sub>3</sub>  | 1.82 | K1.82 | K1.82LiMn <sub>3</sub> (PO <sub>4</sub> ) <sub>3</sub>  |
| LiMn <sub>3</sub> (PO <sub>4</sub> ) <sub>4</sub>  | 3.16 | K3.16 | K3.16LiMn <sub>3</sub> (PO <sub>4</sub> ) <sub>4</sub>  |
| LiMn <sub>3</sub> O <sub>6</sub>                   | 1.44 | K1.44 | K1.44LiMn <sub>3</sub> O <sub>6</sub>                   |
| LiMn <sub>3</sub> OF <sub>8</sub>                  | 1.97 | K1.97 | K1.97LiMn <sub>3</sub> OF <sub>8</sub>                  |
| LiMn <sub>4</sub> (BO <sub>3</sub> ) <sub>4</sub>  | 1.73 | K1.73 | K1.73LiMn <sub>4</sub> (BO <sub>3</sub> ) <sub>4</sub>  |
| LiMn <sub>5</sub> (CuO <sub>6</sub> ) <sub>2</sub> | 3.35 | K3.35 | K3.35LiMn <sub>5</sub> (CuO <sub>6</sub> ) <sub>2</sub> |
| LiMn <sub>5</sub> O <sub>10</sub>                  | 2.67 | K2.67 | K2.67LiMn <sub>5</sub> O <sub>10</sub>                  |
| LiMn <sub>7</sub> O <sub>12</sub>                  | 3.7  | K3.7  | K3.7LiMn <sub>7</sub> O <sub>12</sub>                   |
| LiMnAsCO <sub>7</sub>                              | 1.76 | K1.76 | K1.76LiMnAsCO <sub>7</sub>                              |
| LiMnCr <sub>2</sub> O <sub>6</sub>                 | 1.92 | K1.92 | K1.92LiMnCr <sub>2</sub> O <sub>6</sub>                 |
| LiMnF <sub>4</sub>                                 | 0.84 | K0.84 | K0.84LiMnF <sub>4</sub>                                 |
| LiMnFeO <sub>4</sub>                               | 1.11 | K1.11 | K1.11LiMnFeO <sub>4</sub>                               |
| LiMnH <sub>4</sub> (SO <sub>5</sub> ) <sub>2</sub> | 1.61 | K1.61 | K1.61LiMnH <sub>4</sub> (SO <sub>5</sub> ) <sub>2</sub> |
| LiMnNbO <sub>4</sub>                               | 0.97 | K0.97 | K0.97LiMnNbO <sub>4</sub>                               |
| LiMnNiO <sub>4</sub>                               | 1.01 | K1.01 | K1.01LiMnNiO <sub>4</sub>                               |
| LiMnP <sub>2</sub> O <sub>7</sub>                  | 1.34 | K1.34 | K1.34LiMnP <sub>2</sub> O <sub>7</sub>                  |
| LiMnPCO <sub>7</sub>                               | 1.58 | K1.58 | K1.58LiMnPCO <sub>7</sub>                               |
| LiMnSnO <sub>4</sub>                               | 1.24 | K1.24 | K1.24LiMnSnO <sub>4</sub>                               |
| LiMnV(PO <sub>4</sub> ) <sub>3</sub>               | 1.73 | K1.73 | K1.73LiMnV(PO <sub>4</sub> ) <sub>3</sub>               |
| LiMnVO <sub>4</sub>                                | 1.1  | K1.1  | K1.1LiMnVO <sub>4</sub>                                 |
| LiMo(PO <sub>4</sub> ) <sub>2</sub>                | 1.33 | K1.33 | K1.33LiMo(PO <sub>4</sub> ) <sub>2</sub>                |

|                                                                 |      |       |                                                                      |
|-----------------------------------------------------------------|------|-------|----------------------------------------------------------------------|
| LiNb(PO <sub>4</sub> ) <sub>2</sub>                             | 1.41 | K1.41 | K1.41LiNb(PO <sub>4</sub> ) <sub>2</sub>                             |
| LiNb(TeO <sub>4</sub> ) <sub>3</sub>                            | 3.12 | K3.12 | K3.12LiNb(TeO <sub>4</sub> ) <sub>3</sub>                            |
| LiNb <sub>7</sub> V <sub>12</sub> O <sub>48</sub>               | 4.99 | K4.99 | K4.99LiNb <sub>7</sub> V <sub>12</sub> O <sub>48</sub>               |
| LiNbF <sub>6</sub>                                              | 1.57 | K1.57 | K1.57LiNbF <sub>6</sub>                                              |
| LiNbP <sub>4</sub> O <sub>13</sub>                              | 1.88 | K1.88 | K1.88LiNbP <sub>4</sub> O <sub>13</sub>                              |
| LiNbTe <sub>2</sub> WO <sub>12</sub>                            | 2.84 | K2.84 | K2.84LiNbTe <sub>2</sub> WO <sub>12</sub>                            |
| LiNbVO <sub>4</sub>                                             | 0.93 | K0.93 | K0.93LiNbVO <sub>4</sub>                                             |
| LiNi(CO <sub>3</sub> ) <sub>2</sub>                             | 0.84 | K0.84 | K0.84LiNi(CO <sub>3</sub> ) <sub>2</sub>                             |
| LiNiCSO <sub>7</sub>                                            | 1.36 | K1.36 | K1.36LiNiCSO <sub>7</sub>                                            |
| LiNiP <sub>2</sub> O <sub>7</sub>                               | 1.3  | K1.3  | K1.3LiNiP <sub>2</sub> O <sub>7</sub>                                |
| LiNiSnO <sub>4</sub>                                            | 1.19 | K1.19 | K1.19LiNiSnO <sub>4</sub>                                            |
| LiP <sub>2</sub> WO <sub>8</sub>                                | 1.67 | K1.67 | K1.67LiP <sub>2</sub> WO <sub>8</sub>                                |
| LiReO <sub>3</sub>                                              | 0.79 | K0.79 | K0.79LiReO <sub>3</sub>                                              |
| LiSb(PO <sub>4</sub> ) <sub>2</sub>                             | 2.04 | K2.04 | K2.04LiSb(PO <sub>4</sub> ) <sub>2</sub>                             |
| LiSb(TeO <sub>4</sub> ) <sub>3</sub>                            | 3.93 | K3.93 | K3.93LiSb(TeO <sub>4</sub> ) <sub>3</sub>                            |
| LiSb <sub>2</sub> (PO <sub>4</sub> ) <sub>3</sub>               | 2.47 | K2.47 | K2.47LiSb <sub>2</sub> (PO <sub>4</sub> ) <sub>3</sub>               |
| LiSbAu                                                          | 0.78 | K0.78 | K0.78LiSbAu                                                          |
| LiSbTe <sub>2</sub> WO <sub>12</sub>                            | 3.09 | K3.09 | K3.09LiSbTe <sub>2</sub> WO <sub>12</sub>                            |
| LiSn(PO <sub>3</sub> ) <sub>4</sub>                             | 1.93 | K1.93 | K1.93LiSn(PO <sub>3</sub> ) <sub>4</sub>                             |
| LiSn <sub>2</sub> (PO <sub>4</sub> ) <sub>3</sub>               | 2.29 | K2.29 | K2.29LiSn <sub>2</sub> (PO <sub>4</sub> ) <sub>3</sub>               |
| LiSn <sub>2</sub> P <sub>4</sub> H <sub>3</sub> O <sub>16</sub> | 3.12 | K3.12 | K3.12LiSn <sub>2</sub> P <sub>4</sub> H <sub>3</sub> O <sub>16</sub> |
| LiSn <sub>2</sub> P <sub>5</sub> O <sub>16</sub>                | 3.39 | K3.39 | K3.39LiSn <sub>2</sub> P <sub>5</sub> O <sub>16</sub>                |
| LiSnP <sub>2</sub> O <sub>7</sub>                               | 1.53 | K1.53 | K1.53LiSnP <sub>2</sub> O <sub>7</sub>                               |
| LiTi(PO <sub>3</sub> ) <sub>5</sub>                             | 2.26 | K2.26 | K2.26LiTi(PO <sub>3</sub> ) <sub>5</sub>                             |

|                                                    |      |       |                                                         |
|----------------------------------------------------|------|-------|---------------------------------------------------------|
| LiTi <sub>2</sub> (PO <sub>4</sub> ) <sub>3</sub>  | 1.29 | K1.29 | K1.29LiTi <sub>2</sub> (PO <sub>4</sub> ) <sub>3</sub>  |
| LiTi <sub>2</sub> Co <sub>3</sub> O <sub>10</sub>  | 2.97 | K2.97 | K2.97LiTi <sub>2</sub> Co <sub>3</sub> O <sub>10</sub>  |
| LiTi <sub>2</sub> Mn <sub>3</sub> O <sub>10</sub>  | 2.87 | K2.87 | K2.87LiTi <sub>2</sub> Mn <sub>3</sub> O <sub>10</sub>  |
| LiTi <sub>2</sub> O <sub>4</sub>                   | 0.75 | K0.75 | K0.75LiTi <sub>2</sub> O <sub>4</sub>                   |
| LiTi <sub>2</sub> V <sub>3</sub> O <sub>10</sub>   | 2.7  | K2.7  | K2.7LiTi <sub>2</sub> V <sub>3</sub> O <sub>10</sub>    |
| LiTi <sub>2</sub> V <sub>3</sub> O <sub>12</sub>   | 2.34 | K2.34 | K2.34LiTi <sub>2</sub> V <sub>3</sub> O <sub>12</sub>   |
| LiTi <sub>2</sub> VO <sub>6</sub>                  | 1.63 | K1.63 | K1.63LiTi <sub>2</sub> VO <sub>6</sub>                  |
| LiTi <sub>3</sub> V(PO <sub>4</sub> ) <sub>6</sub> | 3.83 | K3.83 | K3.83LiTi <sub>3</sub> V(PO <sub>4</sub> ) <sub>6</sub> |
| LiTi <sub>3</sub> VO <sub>8</sub>                  | 1.74 | K1.74 | K1.74LiTi <sub>3</sub> VO <sub>8</sub>                  |
| LiTiCoO <sub>4</sub>                               | 1.08 | K1.08 | K1.08LiTiCoO <sub>4</sub>                               |
| LiTiCrO <sub>4</sub>                               | 1.05 | K1.05 | K1.05LiTiCrO <sub>4</sub>                               |
| LiTiFe <sub>2</sub> O <sub>5</sub>                 | 1.28 | K1.28 | K1.28LiTiFe <sub>2</sub> O <sub>5</sub>                 |
| LiTiFeO <sub>4</sub>                               | 1.03 | K1.03 | K1.03LiTiFeO <sub>4</sub>                               |
| LiTiMnO <sub>4</sub>                               | 0.96 | K0.96 | K0.96LiTiMnO <sub>4</sub>                               |
| LiTiNiO <sub>4</sub>                               | 0.87 | K0.87 | K0.87LiTiNiO <sub>4</sub>                               |
| LiTiPCO <sub>7</sub>                               | 1.27 | K1.27 | K1.27LiTiPCO <sub>7</sub>                               |
| LiTiV <sub>2</sub> O <sub>6</sub>                  | 1.62 | K1.62 | K1.62LiTiV <sub>2</sub> O <sub>6</sub>                  |
| LiTiV <sub>3</sub> O <sub>10</sub>                 | 2.33 | K2.33 | K2.33LiTiV <sub>3</sub> O <sub>10</sub>                 |
| LiTiV <sub>3</sub> O <sub>8</sub>                  | 2.06 | K2.06 | K2.06LiTiV <sub>3</sub> O <sub>8</sub>                  |
| LiTiVO <sub>4</sub>                                | 0.79 | K0.79 | K0.79LiTiVO <sub>4</sub>                                |
| LiTiVO <sub>4</sub>                                | 0.86 | K0.86 | K0.86LiTiVO <sub>4</sub>                                |
| LiTiVO <sub>5</sub>                                | 1.21 | K1.21 | K1.21LiTiVO <sub>5</sub>                                |
| LiV(CO <sub>3</sub> ) <sub>2</sub>                 | 0.91 | K0.91 | K0.91LiV(CO <sub>3</sub> ) <sub>2</sub>                 |
| LiV(OF) <sub>2</sub>                               | 0.69 | K0.69 | K0.69LiV(OF) <sub>2</sub>                               |

|                                                                 |      |       |                                                                      |
|-----------------------------------------------------------------|------|-------|----------------------------------------------------------------------|
| LiV(PO <sub>3</sub> ) <sub>4</sub>                              | 1.77 | K1.77 | K1.77LiV(PO <sub>3</sub> ) <sub>4</sub>                              |
| LiV(PO <sub>4</sub> ) <sub>2</sub>                              | 1.2  | K1.2  | K1.2LiV(PO <sub>4</sub> ) <sub>2</sub>                               |
| LiV(Si <sub>2</sub> O <sub>5</sub> ) <sub>3</sub>               | 2.13 | K2.13 | K2.13LiV(Si <sub>2</sub> O <sub>5</sub> ) <sub>3</sub>               |
| LiV(TeO <sub>4</sub> ) <sub>3</sub>                             | 3.13 | K3.13 | K3.13LiV(TeO <sub>4</sub> ) <sub>3</sub>                             |
| LiV <sub>2</sub> (CO <sub>3</sub> ) <sub>4</sub>                | 1.85 | K1.85 | K1.85LiV <sub>2</sub> (CO <sub>3</sub> ) <sub>4</sub>                |
| LiV <sub>2</sub> (CO <sub>4</sub> ) <sub>2</sub>                | 1.28 | K1.28 | K1.28LiV <sub>2</sub> (CO <sub>4</sub> ) <sub>2</sub>                |
| LiV <sub>2</sub> (SiO <sub>4</sub> ) <sub>2</sub>               | 1.58 | K1.58 | K1.58LiV <sub>2</sub> (SiO <sub>4</sub> ) <sub>2</sub>               |
| LiV <sub>2</sub> CrO <sub>6</sub>                               | 1.6  | K1.6  | K1.6LiV <sub>2</sub> CrO <sub>6</sub>                                |
| LiV <sub>2</sub> F <sub>7</sub>                                 | 1.4  | K1.4  | K1.4LiV <sub>2</sub> F <sub>7</sub>                                  |
| LiV <sub>2</sub> O <sub>4</sub>                                 | 1.01 | K1.01 | K1.01LiV <sub>2</sub> O <sub>4</sub>                                 |
| LiV <sub>2</sub> P <sub>4</sub> (HO <sub>8</sub> ) <sub>2</sub> | 2.19 | K2.19 | K2.19LiV <sub>2</sub> P <sub>4</sub> (HO <sub>8</sub> ) <sub>2</sub> |
| LiV <sub>3</sub> CoO <sub>10</sub>                              | 2.36 | K2.36 | K2.36LiV <sub>3</sub> CoO <sub>10</sub>                              |
| LiV <sub>3</sub> CrO <sub>8</sub>                               | 2.09 | K2.09 | K2.09LiV <sub>3</sub> CrO <sub>8</sub>                               |
| LiV <sub>3</sub> O <sub>8</sub>                                 | 1.84 | K1.84 | K1.84LiV <sub>3</sub> O <sub>8</sub>                                 |
| LiV <sub>3</sub> OF <sub>11</sub>                               | 2.62 | K2.62 | K2.62LiV <sub>3</sub> OF <sub>11</sub>                               |
| LiV <sub>4</sub> CuO <sub>12</sub>                              | 2.39 | K2.39 | K2.39LiV <sub>4</sub> CuO <sub>12</sub>                              |
| LiV <sub>5</sub> O <sub>10</sub>                                | 2.46 | K2.46 | K2.46LiV <sub>5</sub> O <sub>10</sub>                                |
| LiVAsCO <sub>7</sub>                                            | 1.3  | K1.3  | K1.3LiVAsCO <sub>7</sub>                                             |
| LiVCoO <sub>4</sub>                                             | 0.99 | K0.99 | K0.99LiVCoO <sub>4</sub>                                             |
| LiVCrO <sub>4</sub>                                             | 1.13 | K1.13 | K1.13LiVCrO <sub>4</sub>                                             |
| LiVF <sub>4</sub>                                               | 0.97 | K0.97 | K0.97LiVF <sub>4</sub>                                               |
| LiVF <sub>6</sub>                                               | 1.09 | K1.09 | K1.09LiVF <sub>6</sub>                                               |
| LiVFeO <sub>4</sub>                                             | 1.05 | K1.05 | K1.05LiVFeO <sub>4</sub>                                             |
| LiVO <sub>3</sub>                                               | 0.84 | K0.84 | K0.84LiVO <sub>3</sub>                                               |

|                |      |       |                     |
|----------------|------|-------|---------------------|
| LiVOF4         | 0.88 | K0.88 | K0.88LiVOF4         |
| LiVPCO7        | 1.08 | K1.08 | K1.08LiVPCO7        |
| LiVPO4F        | 0.86 | K0.86 | K0.86LiVPO4F        |
| LiVSi4(HO6)2   | 1.74 | K1.74 | K1.74LiVSi4(HO6)2   |
| LiVSiCO7       | 1.31 | K1.31 | K1.31LiVSiCO7       |
| LiVSiO5        | 0.84 | K0.84 | K0.84LiVSiO5        |
| LiVTe(WO6)2    | 2.69 | K2.69 | K2.69LiVTe(WO6)2    |
| Lu(NbCl3)6     | 3.19 | K3.19 | K3.19Lu(NbCl3)6     |
| Mg(Fe5O8)2     | 3    | K3    | K3Mg(Fe5O8)2        |
| Mg(NiO2)4      | 1.83 | K1.83 | K1.83Mg(NiO2)4      |
| Mg2Mn3O8       | 1.72 | K1.72 | K1.72Mg2Mn3O8       |
| Mg2Ni          | 0.7  | K0.7  | K0.7Mg2Ni           |
| Mg3Cu9(SiO3)16 | 3.27 | K3.27 | K3.27Mg3Cu9(SiO3)16 |
| MgCr3(SO4)6    | 3.51 | K3.51 | K3.51MgCr3(SO4)6    |
| MgCr3Se2(SO6)4 | 4.59 | K4.59 | K4.59MgCr3Se2(SO6)4 |
| MgCr3Se3(SO8)3 | 4.18 | K4.18 | K4.18MgCr3Se3(SO8)3 |
| MgCu2(SiO3)4   | 2.13 | K2.13 | K2.13MgCu2(SiO3)4   |
| MgSbPd         | 0.94 | K0.94 | K0.94MgSbPd         |
| MgSbPt         | 0.88 | K0.88 | K0.88MgSbPt         |
| MgSn           | 0.63 | K0.63 | K0.63MgSn           |
| MgSnAu         | 0.88 | K0.88 | K0.88MgSnAu         |
| Mn(CO3)2       | 1.16 | K1.16 | K1.16Mn(CO3)2       |
| Mn(CoO2)4      | 2.96 | K2.96 | K2.96Mn(CoO2)4      |
| Mn(CoO3)2      | 1.78 | K1.78 | K1.78Mn(CoO3)2      |

|                                                                   |      |       |                                                                        |
|-------------------------------------------------------------------|------|-------|------------------------------------------------------------------------|
| Mn(GeO <sub>3</sub> ) <sub>2</sub>                                | 1.71 | K1.71 | K1.71Mn(GeO <sub>3</sub> ) <sub>2</sub>                                |
| Mn(PO <sub>3</sub> ) <sub>3</sub>                                 | 2.2  | K2.2  | K2.2Mn(PO <sub>3</sub> ) <sub>3</sub>                                  |
| Mn(PO <sub>3</sub> ) <sub>4</sub>                                 | 2.1  | K2.1  | K2.1Mn(PO <sub>3</sub> ) <sub>4</sub>                                  |
| Mn(SbO <sub>3</sub> ) <sub>4</sub>                                | 4.03 | K4.03 | K4.03Mn(SbO <sub>3</sub> ) <sub>4</sub>                                |
| Mn(SiO <sub>3</sub> ) <sub>2</sub>                                | 1.65 | K1.65 | K1.65Mn(SiO <sub>3</sub> ) <sub>2</sub>                                |
| Mn <sub>13</sub> Cr <sub>3</sub> O <sub>32</sub>                  | 4.12 | K4.12 | K4.12Mn <sub>13</sub> Cr <sub>3</sub> O <sub>32</sub>                  |
| Mn <sub>13</sub> Fe <sub>3</sub> O <sub>32</sub>                  | 3.65 | K3.65 | K3.65Mn <sub>13</sub> Fe <sub>3</sub> O <sub>32</sub>                  |
| Mn <sub>15</sub> NiO <sub>32</sub>                                | 3.33 | K3.33 | K3.33Mn <sub>15</sub> NiO <sub>32</sub>                                |
| Mn <sub>15</sub> O <sub>32</sub>                                  | 5.4  | K5.4  | K5.4Mn <sub>15</sub> O <sub>32</sub>                                   |
| Mn <sub>2</sub> (SO <sub>4</sub> ) <sub>3</sub>                   | 2.03 | K2.03 | K2.03Mn <sub>2</sub> (SO <sub>4</sub> ) <sub>3</sub>                   |
| Mn <sub>21</sub> O <sub>40</sub>                                  | 4.44 | K4.44 | K4.44Mn <sub>21</sub> O <sub>40</sub>                                  |
| Mn <sub>2</sub> Co(PO <sub>4</sub> ) <sub>3</sub>                 | 2.2  | K2.2  | K2.2Mn <sub>2</sub> Co(PO <sub>4</sub> ) <sub>3</sub>                  |
| Mn <sub>2</sub> Co <sub>3</sub> Te <sub>3</sub> O <sub>16</sub>   | 5.19 | K5.19 | K5.19Mn <sub>2</sub> Co <sub>3</sub> Te <sub>3</sub> O <sub>16</sub>   |
| Mn <sub>2</sub> Co <sub>5</sub> O <sub>12</sub>                   | 3.66 | K3.66 | K3.66Mn <sub>2</sub> Co <sub>5</sub> O <sub>12</sub>                   |
| Mn <sub>2</sub> CoO <sub>6</sub>                                  | 2.56 | K2.56 | K2.56Mn <sub>2</sub> CoO <sub>6</sub>                                  |
| Mn <sub>2</sub> Cr <sub>3</sub> O <sub>12</sub>                   | 1.8  | K1.8  | K1.8Mn <sub>2</sub> Cr <sub>3</sub> O <sub>12</sub>                    |
| Mn <sub>2</sub> Cr <sub>3</sub> Sb <sub>3</sub> O <sub>16</sub>   | 5.36 | K5.36 | K5.36Mn <sub>2</sub> Cr <sub>3</sub> Sb <sub>3</sub> O <sub>16</sub>   |
| Mn <sub>2</sub> CrO <sub>6</sub>                                  | 1.57 | K1.57 | K1.57Mn <sub>2</sub> CrO <sub>6</sub>                                  |
| Mn <sub>2</sub> Fe(PO <sub>4</sub> ) <sub>3</sub>                 | 2.08 | K2.08 | K2.08Mn <sub>2</sub> Fe(PO <sub>4</sub> ) <sub>3</sub>                 |
| Mn <sub>2</sub> Fe <sub>3</sub> Co <sub>3</sub> O <sub>16</sub>   | 5.77 | K5.77 | K5.77Mn <sub>2</sub> Fe <sub>3</sub> Co <sub>3</sub> O <sub>16</sub>   |
| Mn <sub>2</sub> Fe <sub>3</sub> P <sub>6</sub> WO <sub>24</sub>   | 3.29 | K3.29 | K3.29Mn <sub>2</sub> Fe <sub>3</sub> P <sub>6</sub> WO <sub>24</sub>   |
| Mn <sub>2</sub> Fe <sub>3</sub> Sb(PO <sub>4</sub> ) <sub>6</sub> | 3.82 | K3.82 | K3.82Mn <sub>2</sub> Fe <sub>3</sub> Sb(PO <sub>4</sub> ) <sub>6</sub> |
| Mn <sub>2</sub> Fe <sub>3</sub> Sn(PO <sub>4</sub> ) <sub>6</sub> | 3.86 | K3.86 | K3.86Mn <sub>2</sub> Fe <sub>3</sub> Sn(PO <sub>4</sub> ) <sub>6</sub> |
| Mn <sub>2</sub> FeO <sub>6</sub>                                  | 2.47 | K2.47 | K2.47Mn <sub>2</sub> FeO <sub>6</sub>                                  |



|                                                                   |      |       |                                                                        |
|-------------------------------------------------------------------|------|-------|------------------------------------------------------------------------|
| Mn <sub>2</sub> NbNi <sub>3</sub> (PO <sub>4</sub> ) <sub>6</sub> | 4.15 | K4.15 | K4.15Mn <sub>2</sub> NbNi <sub>3</sub> (PO <sub>4</sub> ) <sub>6</sub> |
| Mn <sub>2</sub> Ni(PO <sub>4</sub> ) <sub>3</sub>                 | 2.35 | K2.35 | K2.35Mn <sub>2</sub> Ni(PO <sub>4</sub> ) <sub>3</sub>                 |
| Mn <sub>2</sub> O <sub>2</sub> F <sub>3</sub>                     | 0.98 | K0.98 | K0.98Mn <sub>2</sub> O <sub>2</sub> F <sub>3</sub>                     |
| Mn <sub>2</sub> O <sub>3</sub> F                                  | 0.98 | K0.98 | K0.98Mn <sub>2</sub> O <sub>3</sub> F                                  |
| Mn <sub>2</sub> O <sub>2</sub> F <sub>3</sub>                     | 0.86 | K0.86 | K0.86Mn <sub>2</sub> O <sub>2</sub> F <sub>3</sub>                     |
| Mn <sub>2</sub> P <sub>2</sub> O <sub>7</sub> F <sub>2</sub>      | 2    | K2    | K2Mn <sub>2</sub> P <sub>2</sub> O <sub>7</sub> F <sub>2</sub>         |
| Mn <sub>2</sub> P <sub>2</sub> O <sub>9</sub>                     | 1.85 | K1.85 | K1.85Mn <sub>2</sub> P <sub>2</sub> O <sub>9</sub>                     |
| Mn <sub>2</sub> PO <sub>5</sub>                                   | 1.32 | K1.32 | K1.32Mn <sub>2</sub> PO <sub>5</sub>                                   |
| Mn <sub>2</sub> Si <sub>2</sub> O <sub>7</sub>                    | 2.05 | K2.05 | K2.05Mn <sub>2</sub> Si <sub>2</sub> O <sub>7</sub>                    |
| Mn <sub>3</sub> (P <sub>2</sub> O <sub>7</sub> ) <sub>2</sub>     | 2.94 | K2.94 | K2.94Mn <sub>3</sub> (P <sub>2</sub> O <sub>7</sub> ) <sub>2</sub>     |
| Mn <sub>3</sub> (PO <sub>4</sub> ) <sub>4</sub>                   | 2.75 | K2.75 | K2.75Mn <sub>3</sub> (PO <sub>4</sub> ) <sub>4</sub>                   |
| Mn <sub>3</sub> (SeO <sub>3</sub> ) <sub>4</sub>                  | 3.07 | K3.07 | K3.07Mn <sub>3</sub> (SeO <sub>3</sub> ) <sub>4</sub>                  |
| Mn <sub>3</sub> Co <sub>2</sub> Te <sub>3</sub> O <sub>16</sub>   | 6    | K6    | K6Mn <sub>3</sub> Co <sub>2</sub> Te <sub>3</sub> O <sub>16</sub>      |
| Mn <sub>3</sub> Co <sub>3</sub> (SbO <sub>8</sub> ) <sub>2</sub>  | 5.04 | K5.04 | K5.04Mn <sub>3</sub> Co <sub>3</sub> (SbO <sub>8</sub> ) <sub>2</sub>  |
| Mn <sub>3</sub> Co <sub>3</sub> (SnO <sub>8</sub> ) <sub>2</sub>  | 6.41 | K6.41 | K6.41Mn <sub>3</sub> Co <sub>3</sub> (SnO <sub>8</sub> ) <sub>2</sub>  |
| Mn <sub>3</sub> Co <sub>3</sub> (TeO <sub>8</sub> ) <sub>2</sub>  | 5.15 | K5.15 | K5.15Mn <sub>3</sub> Co <sub>3</sub> (TeO <sub>8</sub> ) <sub>2</sub>  |
| Mn <sub>3</sub> CoO <sub>8</sub>                                  | 2.88 | K2.88 | K2.88Mn <sub>3</sub> CoO <sub>8</sub>                                  |
| Mn <sub>3</sub> Cr(PO <sub>4</sub> ) <sub>4</sub>                 | 3.91 | K3.91 | K3.91Mn <sub>3</sub> Cr(PO <sub>4</sub> ) <sub>4</sub>                 |
| Mn <sub>3</sub> Cr <sub>2</sub> Sb <sub>3</sub> O <sub>16</sub>   | 4.89 | K4.89 | K4.89Mn <sub>3</sub> Cr <sub>2</sub> Sb <sub>3</sub> O <sub>16</sub>   |
| Mn <sub>3</sub> Cr <sub>2</sub> Sn(PO <sub>4</sub> ) <sub>6</sub> | 4.08 | K4.08 | K4.08Mn <sub>3</sub> Cr <sub>2</sub> Sn(PO <sub>4</sub> ) <sub>6</sub> |
| Mn <sub>3</sub> Cr <sub>3</sub> (CoO <sub>8</sub> ) <sub>2</sub>  | 4.39 | K4.39 | K4.39Mn <sub>3</sub> Cr <sub>3</sub> (CoO <sub>8</sub> ) <sub>2</sub>  |
| Mn <sub>3</sub> Cr <sub>3</sub> (SnO <sub>8</sub> ) <sub>2</sub>  | 5.77 | K5.77 | K5.77Mn <sub>3</sub> Cr <sub>3</sub> (SnO <sub>8</sub> ) <sub>2</sub>  |
| Mn <sub>3</sub> Cr <sub>3</sub> (TeO <sub>8</sub> ) <sub>2</sub>  | 5.54 | K5.54 | K5.54Mn <sub>3</sub> Cr <sub>3</sub> (TeO <sub>8</sub> ) <sub>2</sub>  |
| Mn <sub>3</sub> Cr <sub>3</sub> (WO <sub>8</sub> ) <sub>2</sub>   | 3.73 | K3.73 | K3.73Mn <sub>3</sub> Cr <sub>3</sub> (WO <sub>8</sub> ) <sub>2</sub>   |

|                |      |       |                     |
|----------------|------|-------|---------------------|
| Mn3Cr5O16      | 4.08 | K4.08 | K4.08Mn3Cr5O16      |
| Mn3CrCo2(PO4)6 | 3.95 | K3.95 | K3.95Mn3CrCo2(PO4)6 |
| Mn3CrO8        | 2.41 | K2.41 | K2.41Mn3CrO8        |
| Mn3Cu(PO4)4    | 3.85 | K3.85 | K3.85Mn3Cu(PO4)4    |
| Mn3CuNi2(PO4)6 | 4.43 | K4.43 | K4.43Mn3CuNi2(PO4)6 |
| Mn3CuO8        | 2.68 | K2.68 | K2.68Mn3CuO8        |
| Mn3Fe(PO4)4    | 2.23 | K2.23 | K2.23Mn3Fe(PO4)4    |
| Mn3Fe2Co3O16   | 5.39 | K5.39 | K5.39Mn3Fe2Co3O16   |
| Mn3Fe2Sb3O16   | 5.95 | K5.95 | K5.95Mn3Fe2Sb3O16   |
| Mn3Fe2Sn(PO4)6 | 3.94 | K3.94 | K3.94Mn3Fe2Sn(PO4)6 |
| Mn3Fe3(SbO8)2  | 6    | K6    | K6Mn3Fe3(SbO8)2     |
| Mn3Fe3(TeO8)2  | 5.09 | K5.09 | K5.09Mn3Fe3(TeO8)2  |
| Mn3FeO8        | 2.87 | K2.87 | K2.87Mn3FeO8        |
| Mn3Nb(PO4)4    | 3.25 | K3.25 | K3.25Mn3Nb(PO4)4    |
| Mn3Nb2Co3O16   | 5.03 | K5.03 | K5.03Mn3Nb2Co3O16   |
| Mn3Nb2Cr3O16   | 4.57 | K4.57 | K4.57Mn3Nb2Cr3O16   |
| Mn3NbCr2(PO4)6 | 4.16 | K4.16 | K4.16Mn3NbCr2(PO4)6 |
| Mn3NbFe2(PO4)6 | 3.84 | K3.84 | K3.84Mn3NbFe2(PO4)6 |
| Mn3NbO8        | 2.1  | K2.1  | K2.1Mn3NbO8         |
| Mn3Ni(PO4)4    | 4.08 | K4.08 | K4.08Mn3Ni(PO4)4    |
| Mn3Ni3(TeO8)2  | 4.84 | K4.84 | K4.84Mn3Ni3(TeO8)2  |
| Mn3NiO8        | 3.1  | K3.1  | K3.1Mn3NiO8         |
| Mn3OF6         | 1.42 | K1.42 | K1.42Mn3OF6         |
| Mn3P3O13       | 2.85 | K2.85 | K2.85Mn3P3O13       |

|               |      |       |                    |
|---------------|------|-------|--------------------|
| Mn3P6WO24     | 2.87 | K2.87 | K2.87Mn3P6WO24     |
| Mn3Sb(PO4)4   | 4.54 | K4.54 | K4.54Mn3Sb(PO4)4   |
| Mn3Sb(PO4)6   | 3.6  | K3.6  | K3.6Mn3Sb(PO4)6    |
| Mn3SbO8       | 3.05 | K3.05 | K3.05Mn3SbO8       |
| Mn3Si3O10     | 2.59 | K2.59 | K2.59Mn3Si3O10     |
| Mn3Sn(PO4)4   | 3.44 | K3.44 | K3.44Mn3Sn(PO4)4   |
| Mn3Sn3(TeO8)2 | 6.38 | K6.38 | K6.38Mn3Sn3(TeO8)2 |
| Mn3TeO8       | 2.54 | K2.54 | K2.54Mn3TeO8       |
| Mn3V(PO4)4    | 4.16 | K4.16 | K4.16Mn3V(PO4)4    |
| Mn3V2Co3O16   | 5.45 | K5.45 | K5.45Mn3V2Co3O16   |
| Mn3V2Cr3O16   | 4.21 | K4.21 | K4.21Mn3V2Cr3O16   |
| Mn3V2O10      | 2.52 | K2.52 | K2.52Mn3V2O10      |
| Mn3V3(TeO8)2  | 6.27 | K6.27 | K6.27Mn3V3(TeO8)2  |
| Mn3VO8        | 2.07 | K2.07 | K2.07Mn3VO8        |
| Mn4(P2O7)3    | 1.7  | K1.7  | K1.7Mn4(P2O7)3     |
| Mn4(PO4)3     | 1.94 | K1.94 | K1.94Mn4(PO4)3     |
| Mn4CoO8       | 3.02 | K3.02 | K3.02Mn4CoO8       |
| Mn4CrO8       | 2.45 | K2.45 | K2.45Mn4CrO8       |
| Mn4FeO8       | 2.96 | K2.96 | K2.96Mn4FeO8       |
| Mn4NiO8       | 3.1  | K3.1  | K3.1Mn4NiO8        |
| Mn4OF8        | 1.5  | K1.5  | K1.5Mn4OF8         |
| Mn4P7O24      | 2.53 | K2.53 | K2.53Mn4P7O24      |
| Mn4Si4O13     | 3    | K3    | K3Mn4Si4O13        |
| Mn5(P3O11)2   | 3.62 | K3.62 | K3.62Mn5(P3O11)2   |

|             |      |       |                  |
|-------------|------|-------|------------------|
| Mn5(SeO3)8  | 4.91 | K4.91 | K4.91Mn5(SeO3)8  |
| Mn5(Si2O7)2 | 3.27 | K3.27 | K3.27Mn5(Si2O7)2 |
| Mn5Co(PO4)6 | 3.99 | K3.99 | K3.99Mn5Co(PO4)6 |
| Mn5Co3O16   | 4.86 | K4.86 | K4.86Mn5Co3O16   |
| Mn5CoO12    | 4.21 | K4.21 | K4.21Mn5CoO12    |
| Mn5Cr(PO4)6 | 4    | K4    | K4Mn5Cr(PO4)6    |
| Mn5Cr2O12   | 3.57 | K3.57 | K3.57Mn5Cr2O12   |
| Mn5Cr3O16   | 3.96 | K3.96 | K3.96Mn5Cr3O16   |
| Mn5Cu(PO4)6 | 4.19 | K4.19 | K4.19Mn5Cu(PO4)6 |
| Mn5CuO12    | 3.94 | K3.94 | K3.94Mn5CuO12    |
| Mn5Fe(PO4)6 | 3.88 | K3.88 | K3.88Mn5Fe(PO4)6 |
| Mn5Fe3O16   | 4.87 | K4.87 | K4.87Mn5Fe3O16   |
| Mn5FeO12    | 3.81 | K3.81 | K3.81Mn5FeO12    |
| Mn5Ni(PO4)6 | 3.99 | K3.99 | K3.99Mn5Ni(PO4)6 |
| Mn5NiO12    | 3.84 | K3.84 | K3.84Mn5NiO12    |
| Mn5O3F5     | 1.48 | K1.48 | K1.48Mn5O3F5     |
| Mn5O5F      | 1.42 | K1.42 | K1.42Mn5O5F      |
| Mn5O7F      | 1.5  | K1.5  | K1.5Mn5O7F       |
| Mn5O8       | 2.48 | K2.48 | K2.48Mn5O8       |
| Mn5O9F      | 2.2  | K2.2  | K2.2Mn5O9F       |
| Mn5OF11     | 2.75 | K2.75 | K2.75Mn5OF11     |
| Mn5P6WO24   | 3.15 | K3.15 | K3.15Mn5P6WO24   |
| Mn5Sb(PO4)6 | 4.24 | K4.24 | K4.24Mn5Sb(PO4)6 |
| Mn5Sb3O16   | 5.02 | K5.02 | K5.02Mn5Sb3O16   |

|                |      |       |                     |
|----------------|------|-------|---------------------|
| Mn5Sn(PO4)6    | 4.09 | K4.09 | K4.09Mn5Sn(PO4)6    |
| Mn5SnO12       | 3.77 | K3.77 | K3.77Mn5SnO12       |
| Mn5Te3O16      | 5.35 | K5.35 | K5.35Mn5Te3O16      |
| Mn5V(PO4)6     | 4.41 | K4.41 | K4.41Mn5V(PO4)6     |
| Mn7(OF3)3      | 2.56 | K2.56 | K2.56Mn7(OF3)3      |
| Mn7(P2O7)4     | 5    | K5    | K5Mn7(P2O7)4        |
| Mn7(PO4)6      | 4.92 | K4.92 | K4.92Mn7(PO4)6      |
| Mn7F16         | 2.33 | K2.33 | K2.33Mn7F16         |
| Mn7Fe3O20      | 5.12 | K5.12 | K5.12Mn7Fe3O20      |
| Mn7Nb(PO4)12   | 5.92 | K5.92 | K5.92Mn7Nb(PO4)12   |
| Mn7O12         | 2.91 | K2.91 | K2.91Mn7O12         |
| Mn7O7F         | 1.92 | K1.92 | K1.92Mn7O7F         |
| Mn7Sb(PO4)12   | 5.75 | K5.75 | K5.75Mn7Sb(PO4)12   |
| Mn7V(PO4)12    | 5.7  | K5.7  | K5.7Mn7V(PO4)12     |
| Mn9(P2O7)8     | 3.88 | K3.88 | K3.88Mn9(P2O7)8     |
| MnAs           | 0.8  | K0.8  | K0.8MnAs            |
| MnCo(PO4)2     | 2.41 | K2.41 | K2.41MnCo(PO4)2     |
| MnCo3(PO4)4    | 4    | K4    | K4MnCo3(PO4)4       |
| MnCo3O8        | 1.95 | K1.95 | K1.95MnCo3O8        |
| MnCo5O12       | 4.03 | K4.03 | K4.03MnCo5O12       |
| MnCoO4         | 1.33 | K1.33 | K1.33MnCoO4         |
| MnCr(PO4)2     | 1.7  | K1.7  | K1.7MnCr(PO4)2      |
| MnCr2Fe3(PO4)6 | 4.12 | K4.12 | K4.12MnCr2Fe3(PO4)6 |
| MnCr3(PO4)4    | 3.35 | K3.35 | K3.35MnCr3(PO4)4    |

|              |      |       |                   |
|--------------|------|-------|-------------------|
| MnCr3O8      | 1.7  | K1.7  | K1.7MnCr3O8       |
| MnCSO7       | 2.02 | K2.02 | K2.02MnCSO7       |
| MnF3         | 0.58 | K0.58 | K0.58MnF3         |
| MnFe(PO4)2   | 1.59 | K1.59 | K1.59MnFe(PO4)2   |
| MnFe2(PO4)3  | 1.95 | K1.95 | K1.95MnFe2(PO4)3  |
| MnFe3(PO4)4  | 3.8  | K3.8  | K3.8MnFe3(PO4)4   |
| MnFe7(PO4)8  | 5.09 | K5.09 | K5.09MnFe7(PO4)8  |
| MnFeCo(PO4)3 | 2.71 | K2.71 | K2.71MnFeCo(PO4)3 |
| MnH4(SO5)2   | 2.01 | K2.01 | K2.01MnH4(SO5)2   |
| MnH6(S2O9)2  | 2.71 | K2.71 | K2.71MnH6(S2O9)2  |
| MnH8(SO6)2   | 1.7  | K1.7  | K1.7MnH8(SO6)2    |
| MnNb4O12     | 2.87 | K2.87 | K2.87MnNb4O12     |
| MnNi(PO4)2   | 1.97 | K1.97 | K1.97MnNi(PO4)2   |
| MnNi3(PO4)4  | 3.94 | K3.94 | K3.94MnNi3(PO4)4  |
| MnO2         | 0.72 | K0.72 | K0.72MnO2         |
| MnO2         | 0.66 | K0.66 | K0.66MnO2         |
| MnP2HO7      | 1.68 | K1.68 | K1.68MnP2HO7      |
| MnP2O7       | 1.76 | K1.76 | K1.76MnP2O7       |
| MnPHO5       | 1.43 | K1.43 | K1.43MnPHO5       |
| MnPO4        | 0.77 | K0.77 | K0.77MnPO4        |
| MnPO4F       | 1.1  | K1.1  | K1.1MnPO4F        |
| MnS2         | 0.76 | K0.76 | K0.76MnS2         |
| MnSn(PO4)2   | 2.11 | K2.11 | K2.11MnSn(PO4)2   |
| MnV(P2O7)2   | 3.16 | K3.16 | K3.16MnV(P2O7)2   |

|                                                   |      |       |                                                        |
|---------------------------------------------------|------|-------|--------------------------------------------------------|
| MnV(PO <sub>4</sub> ) <sub>2</sub>                | 1.9  | K1.9  | K1.9MnV(PO <sub>4</sub> ) <sub>2</sub>                 |
| MnV <sub>2</sub> (PO <sub>4</sub> ) <sub>3</sub>  | 2.08 | K2.08 | K2.08MnV <sub>2</sub> (PO <sub>4</sub> ) <sub>3</sub>  |
| MnV <sub>3</sub> (PO <sub>4</sub> ) <sub>4</sub>  | 4.14 | K4.14 | K4.14MnV <sub>3</sub> (PO <sub>4</sub> ) <sub>4</sub>  |
| MnV <sub>3</sub> O <sub>8</sub>                   | 2.43 | K2.43 | K2.43MnV <sub>3</sub> O <sub>8</sub>                   |
| MnV <sub>4</sub> CoO <sub>12</sub>                | 3.2  | K3.2  | K3.2MnV <sub>4</sub> CoO <sub>12</sub>                 |
| MnV <sub>4</sub> CuO <sub>12</sub>                | 3.15 | K3.15 | K3.15MnV <sub>4</sub> CuO <sub>12</sub>                |
| MnV <sub>4</sub> FeO <sub>12</sub>                | 3.49 | K3.49 | K3.49MnV <sub>4</sub> FeO <sub>12</sub>                |
| MnV <sub>4</sub> NiO <sub>12</sub>                | 3.07 | K3.07 | K3.07MnV <sub>4</sub> NiO <sub>12</sub>                |
| MnV <sub>4</sub> O <sub>12</sub>                  | 2.9  | K2.9  | K2.9MnV <sub>4</sub> O <sub>12</sub>                   |
| MnV <sub>5</sub> O <sub>12</sub>                  | 3.71 | K3.71 | K3.71MnV <sub>5</sub> O <sub>12</sub>                  |
| MnVO <sub>4</sub>                                 | 1.27 | K1.27 | K1.27MnVO <sub>4</sub>                                 |
| MnVP <sub>2</sub> (O <sub>4</sub> F) <sub>2</sub> | 2.64 | K2.64 | K2.64MnVP <sub>2</sub> (O <sub>4</sub> F) <sub>2</sub> |
| Mo(PO <sub>3</sub> ) <sub>4</sub>                 | 1.91 | K1.91 | K1.91Mo(PO <sub>3</sub> ) <sub>4</sub>                 |
| Mo(PO <sub>4</sub> ) <sub>2</sub>                 | 1.16 | K1.16 | K1.16Mo(PO <sub>4</sub> ) <sub>2</sub>                 |
| Mo <sub>15</sub> S <sub>19</sub>                  | 2.32 | K2.32 | K2.32Mo <sub>15</sub> S <sub>19</sub>                  |
| Mo <sub>15</sub> Se <sub>19</sub>                 | 1.9  | K1.9  | K1.9Mo <sub>15</sub> Se <sub>19</sub>                  |
| Mo <sub>2</sub> (PO <sub>4</sub> ) <sub>3</sub>   | 1.9  | K1.9  | K1.9Mo <sub>2</sub> (PO <sub>4</sub> ) <sub>3</sub>    |
| Mo <sub>2</sub> P <sub>2</sub> O <sub>11</sub>    | 2.52 | K2.52 | K2.52Mo <sub>2</sub> P <sub>2</sub> O <sub>11</sub>    |
| Mo <sub>2</sub> P <sub>2</sub> O <sub>9</sub>     | 1.97 | K1.97 | K1.97Mo <sub>2</sub> P <sub>2</sub> O <sub>9</sub>     |
| Mo <sub>2</sub> P <sub>3</sub> O <sub>13</sub>    | 1.87 | K1.87 | K1.87Mo <sub>2</sub> P <sub>3</sub> O <sub>13</sub>    |
| Mo <sub>3</sub> O <sub>8</sub>                    | 2.46 | K2.46 | K2.46Mo <sub>3</sub> O <sub>8</sub>                    |
| Mo <sub>3</sub> P <sub>3</sub> O <sub>13</sub>    | 2.95 | K2.95 | K2.95Mo <sub>3</sub> P <sub>3</sub> O <sub>13</sub>    |
| Mo <sub>3</sub> S <sub>4</sub>                    | 1.93 | K1.93 | K1.93Mo <sub>3</sub> S <sub>4</sub>                    |
| Mo <sub>3</sub> Se <sub>4</sub>                   | 2.41 | K2.41 | K2.41Mo <sub>3</sub> Se <sub>4</sub>                   |

|              |      |       |                   |
|--------------|------|-------|-------------------|
| Mo4P5O24     | 3.16 | K3.16 | K3.16Mo4P5O24     |
| Mo4P9O32     | 3.54 | K3.54 | K3.54Mo4P9O32     |
| MoO2         | 0.5  | K0.5  | K0.5MoO2          |
| MoP2O7       | 1.36 | K1.36 | K1.36MoP2O7       |
| MoPO5        | 1.04 | K1.04 | K1.04MoPO5        |
| Na(NbSe2)2   | 2.19 | K2.19 | K2.19Na(NbSe2)2   |
| Na2(CrSe2)3  | 2.56 | K2.56 | K2.56Na2(CrSe2)3  |
| Na2Bi2C4S016 | 2.62 | K2.62 | K2.62Na2Bi2C4S016 |
| Na2BiBAsO7   | 1.27 | K1.27 | K1.27Na2BiBAsO7   |
| Na2BiBPO7    | 1.17 | K1.17 | K1.17Na2BiBPO7    |
| Na2C         | 0.24 | K0.24 | K0.24Na2C         |
| Na2CaVP2O9   | 1.16 | K1.16 | K1.16Na2CaVP2O9   |
| Na2CoBAsO7   | 1.36 | K1.36 | K1.36Na2CoBAsO7   |
| Na2CoO3      | 1.11 | K1.11 | K1.11Na2CoO3      |
| Na2CoSiCO7   | 1.23 | K1.23 | K1.23Na2CoSiCO7   |
| Na2CuAsCO7   | 1.41 | K1.41 | K1.41Na2CuAsCO7   |
| Na2CuBSO7    | 1.17 | K1.17 | K1.17Na2CuBSO7    |
| Na2CuP2O7    | 1.27 | K1.27 | K1.27Na2CuP2O7    |
| Na2CuPCO7    | 1.3  | K1.3  | K1.3Na2CuPCO7     |
| Na2FeBAsO7   | 1.35 | K1.35 | K1.35Na2FeBAsO7   |
| Na2FeBPO7    | 1.23 | K1.23 | K1.23Na2FeBPO7    |
| Na2FeO4      | 1.1  | K1.1  | K1.1Na2FeO4       |
| Na2Mn(PO3)5  | 1.98 | K1.98 | K1.98Na2Mn(PO3)5  |
| Na2MnBAsO7   | 1.36 | K1.36 | K1.36Na2MnBAsO7   |



|                                                                                |      |       |                                                                                    |
|--------------------------------------------------------------------------------|------|-------|------------------------------------------------------------------------------------|
| Na <sub>2</sub> MnBPO <sub>7</sub>                                             | 1.23 | K1.23 | K1.23Na <sub>2</sub> MnBPO <sub>7</sub>                                            |
| Na <sub>2</sub> MnBSO <sub>7</sub>                                             | 1.29 | K1.29 | K1.29Na <sub>2</sub> MnBSO <sub>7</sub>                                            |
| Na <sub>2</sub> MnCoNiO <sub>6</sub>                                           | 1.41 | K1.41 | K1.41Na <sub>2</sub> MnCoNiO <sub>6</sub>                                          |
| Na <sub>2</sub> MnPCO <sub>7</sub>                                             | 1.23 | K1.23 | K1.23Na <sub>2</sub> MnPCO <sub>7</sub>                                            |
| Na <sub>2</sub> Ni <sub>2</sub> O <sub>5</sub>                                 | 1.16 | K1.16 | K1.16Na <sub>2</sub> Ni <sub>2</sub> O <sub>5</sub>                                |
| Na <sub>2</sub> NiO <sub>2</sub>                                               | 0.88 | K0.88 | K0.88Na <sub>2</sub> NiO <sub>2</sub>                                              |
| Na <sub>2</sub> SiBiBO <sub>7</sub>                                            | 1.17 | K1.17 | K1.17Na <sub>2</sub> SiBiBO <sub>7</sub>                                           |
| Na <sub>2</sub> SiBSbO <sub>7</sub>                                            | 1.38 | K1.38 | K1.38Na <sub>2</sub> SiBSbO <sub>7</sub>                                           |
| Na <sub>2</sub> SiSnCO <sub>7</sub>                                            | 1.25 | K1.25 | K1.25Na <sub>2</sub> SiSnCO <sub>7</sub>                                           |
| Na <sub>2</sub> SrVP <sub>2</sub> O <sub>9</sub>                               | 1.2  | K1.2  | K1.2Na <sub>2</sub> SrVP <sub>2</sub> O <sub>9</sub>                               |
| Na <sub>2</sub> Ti <sub>4</sub> O <sub>9</sub>                                 | 1.5  | K1.5  | K1.5Na <sub>2</sub> Ti <sub>4</sub> O <sub>9</sub>                                 |
| Na <sub>2</sub> TIPCO <sub>7</sub>                                             | 1.25 | K1.25 | K1.25Na <sub>2</sub> TIPCO <sub>7</sub>                                            |
| Na <sub>2</sub> V <sub>3</sub> P <sub>2</sub> O <sub>13</sub>                  | 1.7  | K1.7  | K1.7Na <sub>2</sub> V <sub>3</sub> P <sub>2</sub> O <sub>13</sub>                  |
| Na <sub>2</sub> VBA <sub>5</sub> O <sub>7</sub>                                | 1.13 | K1.13 | K1.13Na <sub>2</sub> VBA <sub>5</sub> O <sub>7</sub>                               |
| Na <sub>2</sub> VBPO <sub>7</sub>                                              | 0.94 | K0.94 | K0.94Na <sub>2</sub> VBPO <sub>7</sub>                                             |
| Na <sub>2</sub> VPO <sub>6</sub>                                               | 1.03 | K1.03 | K1.03Na <sub>2</sub> VPO <sub>6</sub>                                              |
| Na <sub>3</sub> (CuO <sub>2</sub> ) <sub>2</sub>                               | 1.24 | K1.24 | K1.24Na <sub>3</sub> (CuO <sub>2</sub> ) <sub>2</sub>                              |
| Na <sub>3</sub> CuPCO <sub>7</sub>                                             | 1.26 | K1.26 | K1.26Na <sub>3</sub> CuPCO <sub>7</sub>                                            |
| Na <sub>3</sub> Fe <sub>2</sub> P(CO <sub>4</sub> ) <sub>4</sub>               | 2.38 | K2.38 | K2.38Na <sub>3</sub> Fe <sub>2</sub> P(CO <sub>4</sub> ) <sub>4</sub>              |
| Na <sub>3</sub> Fe <sub>3</sub> (PO <sub>4</sub> ) <sub>4</sub>                | 2.26 | K2.26 | K2.26Na <sub>3</sub> Fe <sub>3</sub> (PO <sub>4</sub> ) <sub>4</sub>               |
| Na <sub>3</sub> Li <sub>4</sub> Mn <sub>5</sub> O <sub>9</sub>                 | 2.29 | K2.29 | K2.29Na <sub>3</sub> Li <sub>4</sub> Mn <sub>5</sub> O <sub>9</sub>                |
| Na <sub>3</sub> Mn <sub>2</sub> P <sub>2</sub> (CO <sub>7</sub> ) <sub>2</sub> | 1.7  | K1.7  | K1.7Na <sub>3</sub> Mn <sub>2</sub> P <sub>2</sub> (CO <sub>7</sub> ) <sub>2</sub> |
| Na <sub>3</sub> MnBPO <sub>7</sub>                                             | 1.12 | K1.12 | K1.12Na <sub>3</sub> MnBPO <sub>7</sub>                                            |
| Na <sub>3</sub> SbP <sub>2</sub> O <sub>9</sub>                                | 1.66 | K1.66 | K1.66Na <sub>3</sub> SbP <sub>2</sub> O <sub>9</sub>                               |

|                |      |       |                     |
|----------------|------|-------|---------------------|
| Na4B4Sb2SO16   | 1.71 | K1.71 | K1.71Na4B4Sb2SO16   |
| Na4Bi2As(CO4)4 | 2.18 | K2.18 | K2.18Na4Bi2As(CO4)4 |
| Na4Bi2B4SO16   | 1.64 | K1.64 | K1.64Na4Bi2B4SO16   |
| Na4Bi2P(CO4)4  | 2.14 | K2.14 | K2.14Na4Bi2P(CO4)4  |
| Na4Co2P(CO4)4  | 2.04 | K2.04 | K2.04Na4Co2P(CO4)4  |
| Na4Cr2As(CO4)4 | 2.13 | K2.13 | K2.13Na4Cr2As(CO4)4 |
| Na4Cr2C4SO16   | 2.08 | K2.08 | K2.08Na4Cr2C4SO16   |
| Na4Cr2P(CO4)4  | 1.99 | K1.99 | K1.99Na4Cr2P(CO4)4  |
| Na4Cu2C4SO16   | 1.85 | K1.85 | K1.85Na4Cu2C4SO16   |
| Na4Fe2As(CO4)4 | 2.25 | K2.25 | K2.25Na4Fe2As(CO4)4 |
| Na4Mn2As(CO4)4 | 2.34 | K2.34 | K2.34Na4Mn2As(CO4)4 |
| Na4Mn2P(CO4)4  | 2.17 | K2.17 | K2.17Na4Mn2P(CO4)4  |
| Na4Sn2C4SO16   | 2.08 | K2.08 | K2.08Na4Sn2C4SO16   |
| Na4Ti11O24     | 3.78 | K3.78 | K3.78Na4Ti11O24     |
| Na4Ti3O8       | 1.45 | K1.45 | K1.45Na4Ti3O8       |
| Na4V2C4SO16    | 1.77 | K1.77 | K1.77Na4V2C4SO16    |
| Na4V2P(CO4)4   | 1.73 | K1.73 | K1.73Na4V2P(CO4)4   |
| Na5Co2As(CO4)4 | 1.75 | K1.75 | K1.75Na5Co2As(CO4)4 |
| Na5Cu7O13      | 1.85 | K1.85 | K1.85Na5Cu7O13      |
| Na5CuO4        | 1.22 | K1.22 | K1.22Na5CuO4        |
| Na5Fe2P2(CO7)2 | 2.05 | K2.05 | K2.05Na5Fe2P2(CO7)2 |
| Na5Fe6(SiO3)12 | 3.84 | K3.84 | K3.84Na5Fe6(SiO3)12 |
| Na5Mn2O8       | 1.63 | K1.63 | K1.63Na5Mn2O8       |
| Na5Mn2P2(CO7)2 | 1.81 | K1.81 | K1.81Na5Mn2P2(CO7)2 |

|                                                                                |      |       |                                                                                     |
|--------------------------------------------------------------------------------|------|-------|-------------------------------------------------------------------------------------|
| Na <sub>5</sub> Ni <sub>2</sub> As(CO <sub>4</sub> ) <sub>4</sub>              | 1.78 | K1.78 | K1.78Na <sub>5</sub> Ni <sub>2</sub> As(CO <sub>4</sub> ) <sub>4</sub>              |
| Na <sub>5</sub> Ni <sub>2</sub> P <sub>2</sub> (CO <sub>7</sub> ) <sub>2</sub> | 1.89 | K1.89 | K1.89Na <sub>5</sub> Ni <sub>2</sub> P <sub>2</sub> (CO <sub>7</sub> ) <sub>2</sub> |
| Na <sub>5</sub> Sn <sub>2</sub> P(CO <sub>4</sub> ) <sub>4</sub>               | 1.52 | K1.52 | K1.52Na <sub>5</sub> Sn <sub>2</sub> P(CO <sub>4</sub> ) <sub>4</sub>               |
| Na <sub>9</sub> Fe <sub>10</sub> (SiO <sub>3</sub> ) <sub>20</sub>             | 3.78 | K3.78 | K3.78Na <sub>9</sub> Fe <sub>10</sub> (SiO <sub>3</sub> ) <sub>20</sub>             |
| NaBiAsCO <sub>7</sub>                                                          | 1.84 | K1.84 | K1.84NaBiAsCO <sub>7</sub>                                                          |
| NaBiF <sub>6</sub>                                                             | 1.55 | K1.55 | K1.55NaBiF <sub>6</sub>                                                             |
| NaCePCO <sub>7</sub>                                                           | 1.24 | K1.24 | K1.24NaCePCO <sub>7</sub>                                                           |
| NaCoAsCO <sub>7</sub>                                                          | 1.69 | K1.69 | K1.69NaCoAsCO <sub>7</sub>                                                          |
| NaCoCSO <sub>7</sub>                                                           | 1.53 | K1.53 | K1.53NaCoCSO <sub>7</sub>                                                           |
| NaCoPCO <sub>7</sub>                                                           | 1.48 | K1.48 | K1.48NaCoPCO <sub>7</sub>                                                           |
| NaCrAsCO <sub>7</sub>                                                          | 1.65 | K1.65 | K1.65NaCrAsCO <sub>7</sub>                                                          |
| NaCrCSO <sub>7</sub>                                                           | 1.48 | K1.48 | K1.48NaCrCSO <sub>7</sub>                                                           |
| NaCrF <sub>6</sub>                                                             | 1.45 | K1.45 | K1.45NaCrF <sub>6</sub>                                                             |
| NaCrPCO <sub>7</sub>                                                           | 1.46 | K1.46 | K1.46NaCrPCO <sub>7</sub>                                                           |
| NaCu(PO <sub>3</sub> ) <sub>3</sub>                                            | 1.37 | K1.37 | K1.37NaCu(PO <sub>3</sub> ) <sub>3</sub>                                            |
| NaCuCSO <sub>7</sub>                                                           | 1.47 | K1.47 | K1.47NaCuCSO <sub>7</sub>                                                           |
| NaCuO <sub>2</sub>                                                             | 0.68 | K0.68 | K0.68NaCuO <sub>2</sub>                                                             |
| NaCuP <sub>2</sub> O <sub>7</sub>                                              | 1.29 | K1.29 | K1.29NaCuP <sub>2</sub> O <sub>7</sub>                                              |
| NaFePCO <sub>7</sub>                                                           | 1.58 | K1.58 | K1.58NaFePCO <sub>7</sub>                                                           |
| NaGePCO <sub>7</sub>                                                           | 1.76 | K1.76 | K1.76NaGePCO <sub>7</sub>                                                           |
| NaMn <sub>4</sub> O <sub>8</sub>                                               | 2.16 | K2.16 | K2.16NaMn <sub>4</sub> O <sub>8</sub>                                               |
| NaMnPCO <sub>7</sub>                                                           | 1.69 | K1.69 | K1.69NaMnPCO <sub>7</sub>                                                           |
| NaNdPCO <sub>7</sub>                                                           | 1.23 | K1.23 | K1.23NaNdPCO <sub>7</sub>                                                           |
| NaSbF <sub>6</sub>                                                             | 1.63 | K1.63 | K1.63NaSbF <sub>6</sub>                                                             |

|                |      |       |                     |
|----------------|------|-------|---------------------|
| NaSiSbCO7      | 1.91 | K1.91 | K1.91NaSiSbCO7      |
| NaSn           | 0.42 | K0.42 | K0.42NaSn           |
| NaSnAsCO7      | 2.02 | K2.02 | K2.02NaSnAsCO7      |
| NaSnPCO7       | 1.78 | K1.78 | K1.78NaSnPCO7       |
| NaTi2(PO4)3    | 1.53 | K1.53 | K1.53NaTi2(PO4)3    |
| NaTiPCO7       | 1.34 | K1.34 | K1.34NaTiPCO7       |
| NaV2(PO4)3     | 1.84 | K1.84 | K1.84NaV2(PO4)3     |
| NaV3O8         | 1.79 | K1.79 | K1.79NaV3O8         |
| NaV3P2O13      | 1.73 | K1.73 | K1.73NaV3P2O13      |
| NaVAsCO7       | 1.55 | K1.55 | K1.55NaVAsCO7       |
| NaVCSO7        | 1.24 | K1.24 | K1.24NaVCSO7        |
| NaVPCO7        | 1.41 | K1.41 | K1.41NaVPCO7        |
| Nb(PO3)4       | 2.66 | K2.66 | K2.66Nb(PO3)4       |
| Nb2(PO4)3      | 1.94 | K1.94 | K1.94Nb2(PO4)3      |
| Nb3S4          | 1.33 | K1.33 | K1.33Nb3S4          |
| Nb3Se4         | 1.72 | K1.72 | K1.72Nb3Se4         |
| Nb3Te4         | 1.82 | K1.82 | K1.82Nb3Te4         |
| Nb4VO12        | 2.99 | K2.99 | K2.99Nb4VO12        |
| NbCr3(PO4)6    | 3.34 | K3.34 | K3.34NbCr3(PO4)6    |
| NbF5           | 0.78 | K0.78 | K0.78NbF5           |
| NbFe3Cu2(PO4)6 | 4.08 | K4.08 | K4.08NbFe3Cu2(PO4)6 |
| NbFe5(PO4)6    | 3.62 | K3.62 | K3.62NbFe5(PO4)6    |
| NbFeO4         | 1.12 | K1.12 | K1.12NbFeO4         |
| NbO2           | 0.73 | K0.73 | K0.73NbO2           |

|                                                               |      |       |                                                                    |
|---------------------------------------------------------------|------|-------|--------------------------------------------------------------------|
| NbO <sub>2</sub> F                                            | 0.88 | K0.88 | K0.88NbO <sub>2</sub> F                                            |
| NbO <sub>3</sub>                                              | 0.94 | K0.94 | K0.94NbO <sub>3</sub>                                              |
| NbPO <sub>5</sub>                                             | 1.19 | K1.19 | K1.19NbPO <sub>5</sub>                                             |
| NbS <sub>2</sub>                                              | 0.81 | K0.81 | K0.81NbS <sub>2</sub>                                              |
| NbSe <sub>2</sub>                                             | 1.09 | K1.09 | K1.09NbSe <sub>2</sub>                                             |
| NbV <sub>3</sub> (PO <sub>4</sub> ) <sub>6</sub>              | 3.53 | K3.53 | K3.53NbV <sub>3</sub> (PO <sub>4</sub> ) <sub>6</sub>              |
| NbV <sub>3</sub> O <sub>8</sub>                               | 1.8  | K1.8  | K1.8NbV <sub>3</sub> O <sub>8</sub>                                |
| NbWO <sub>7</sub>                                             | 1.34 | K1.34 | K1.34NbWO <sub>7</sub>                                             |
| Ni                                                            | 0.13 | K0.13 | K0.13Ni                                                            |
| Ni(PS <sub>3</sub> ) <sub>2</sub>                             | 1.98 | K1.98 | K1.98Ni(PS <sub>3</sub> ) <sub>2</sub>                             |
| Ni <sub>2</sub> P <sub>2</sub> O <sub>9</sub>                 | 1.91 | K1.91 | K1.91Ni <sub>2</sub> P <sub>2</sub> O <sub>9</sub>                 |
| Ni <sub>3</sub> (P <sub>2</sub> O <sub>7</sub> ) <sub>2</sub> | 2.58 | K2.58 | K2.58Ni <sub>3</sub> (P <sub>2</sub> O <sub>7</sub> ) <sub>2</sub> |
| Ni <sub>3</sub> O <sub>4</sub>                                | 0.9  | K0.9  | K0.9Ni <sub>3</sub> O <sub>4</sub>                                 |
| Ni <sub>3</sub> O <sub>4</sub>                                | 1.08 | K1.08 | K1.08Ni <sub>3</sub> O <sub>4</sub>                                |
| Ni <sub>3</sub> P <sub>3</sub> O <sub>11</sub>                | 1.78 | K1.78 | K1.78Ni <sub>3</sub> P <sub>3</sub> O <sub>11</sub>                |
| Ni <sub>3</sub> P <sub>4</sub> O <sub>15</sub>                | 2.08 | K2.08 | K2.08Ni <sub>3</sub> P <sub>4</sub> O <sub>15</sub>                |
| Ni <sub>3</sub> Sb(PO <sub>4</sub> ) <sub>4</sub>             | 4.28 | K4.28 | K4.28Ni <sub>3</sub> Sb(PO <sub>4</sub> ) <sub>4</sub>             |
| Ni <sub>3</sub> Sn(PO <sub>4</sub> ) <sub>4</sub>             | 3.86 | K3.86 | K3.86Ni <sub>3</sub> Sn(PO <sub>4</sub> ) <sub>4</sub>             |
| Ni <sub>4</sub> (PO <sub>4</sub> ) <sub>3</sub>               | 2.29 | K2.29 | K2.29Ni <sub>4</sub> (PO <sub>4</sub> ) <sub>3</sub>               |
| Ni <sub>4</sub> P <sub>4</sub> O <sub>15</sub>                | 1.62 | K1.62 | K1.62Ni <sub>4</sub> P <sub>4</sub> O <sub>15</sub>                |
| Ni <sub>5</sub> O <sub>6</sub>                                | 1.19 | K1.19 | K1.19Ni <sub>5</sub> O <sub>6</sub>                                |
| Ni <sub>6</sub> O <sub>7</sub>                                | 1.23 | K1.23 | K1.23Ni <sub>6</sub> O <sub>7</sub>                                |
| Ni <sub>9</sub> O <sub>10</sub>                               | 1.45 | K1.45 | K1.45Ni <sub>9</sub> O <sub>10</sub>                               |
| Ni <sub>9</sub> S <sub>10</sub>                               | 2.14 | K2.14 | K2.14Ni <sub>9</sub> S <sub>10</sub>                               |

|                                                  |      |       |                                                       |
|--------------------------------------------------|------|-------|-------------------------------------------------------|
| NiCO <sub>4</sub>                                | 0.79 | K0.79 | K0.79NiCO <sub>4</sub>                                |
| NiH <sub>8</sub> (CO <sub>5</sub> ) <sub>2</sub> | 1.64 | K1.64 | K1.64NiH <sub>8</sub> (CO <sub>5</sub> ) <sub>2</sub> |
| NiO <sub>2</sub>                                 | 0.7  | K0.7  | K0.7NiO <sub>2</sub>                                  |
| NiPO <sub>4</sub>                                | 1.17 | K1.17 | K1.17NiPO <sub>4</sub>                                |
| NiS <sub>2</sub>                                 | 0.73 | K0.73 | K0.73NiS <sub>2</sub>                                 |
| NiSn(PO <sub>4</sub> ) <sub>2</sub>              | 1.82 | K1.82 | K1.82NiSn(PO <sub>4</sub> ) <sub>2</sub>              |
| P(W <sub>3</sub> O <sub>10</sub> ) <sub>4</sub>  | 1.42 | K1.42 | K1.42P(W <sub>3</sub> O <sub>10</sub> ) <sub>4</sub>  |
| P(WO <sub>4</sub> ) <sub>2</sub>                 | 1.41 | K1.41 | K1.41P(WO <sub>4</sub> ) <sub>2</sub>                 |
| P <sub>2</sub> WO <sub>7</sub>                   | 1.43 | K1.43 | K1.43P <sub>2</sub> WO <sub>7</sub>                   |
| P <sub>2</sub> WO <sub>8</sub>                   | 1.07 | K1.07 | K1.07P <sub>2</sub> WO <sub>8</sub>                   |
| P <sub>3</sub> (WO <sub>6</sub> ) <sub>2</sub>   | 1.82 | K1.82 | K1.82P <sub>3</sub> (WO <sub>6</sub> ) <sub>2</sub>   |
| P <sub>3</sub> W <sub>2</sub> O <sub>13</sub>    | 1.68 | K1.68 | K1.68P <sub>3</sub> W <sub>2</sub> O <sub>13</sub>    |
| P <sub>4</sub> WO <sub>12</sub>                  | 1.56 | K1.56 | K1.56P <sub>4</sub> WO <sub>12</sub>                  |
| P <sub>5</sub> WO <sub>15</sub>                  | 1.71 | K1.71 | K1.71P <sub>5</sub> WO <sub>15</sub>                  |
| P <sub>8</sub> W <sub>3</sub> O <sub>29</sub>    | 2.74 | K2.74 | K2.74P <sub>8</sub> W <sub>3</sub> O <sub>29</sub>    |
| PrTi <sub>2</sub> O <sub>6</sub>                 | 1.15 | K1.15 | K1.15PrTi <sub>2</sub> O <sub>6</sub>                 |
| PWO <sub>5</sub>                                 | 1.1  | K1.1  | K1.1PWO <sub>5</sub>                                  |
| Rb <sub>2</sub> CoF <sub>6</sub>                 | 1.42 | K1.42 | K1.42Rb <sub>2</sub> CoF <sub>6</sub>                 |
| Rb <sub>2</sub> CrF <sub>6</sub>                 | 1.78 | K1.78 | K1.78Rb <sub>2</sub> CrF <sub>6</sub>                 |
| Rb <sub>2</sub> CuF <sub>6</sub>                 | 1.46 | K1.46 | K1.46Rb <sub>2</sub> CuF <sub>6</sub>                 |
| Rb <sub>2</sub> MoBr <sub>6</sub>                | 2.65 | K2.65 | K2.65Rb <sub>2</sub> MoBr <sub>6</sub>                |
| Rb <sub>2</sub> NiF <sub>6</sub>                 | 1.38 | K1.38 | K1.38Rb <sub>2</sub> NiF <sub>6</sub>                 |
| Rb <sub>2</sub> SbBr <sub>6</sub>                | 2.5  | K2.5  | K2.5Rb <sub>2</sub> SbBr <sub>6</sub>                 |
| Rb <sub>2</sub> SbCl <sub>6</sub>                | 1.84 | K1.84 | K1.84Rb <sub>2</sub> SbCl <sub>6</sub>                |

|                                                  |      |       |                                                      |
|--------------------------------------------------|------|-------|------------------------------------------------------|
| Rb <sub>2</sub> VCl <sub>6</sub>                 | 1.7  | K1.7  | K1.7Rb <sub>2</sub> VCl <sub>6</sub>                 |
| Rb <sub>2</sub> VF <sub>6</sub>                  | 1.49 | K1.49 | K1.49Rb <sub>2</sub> VF <sub>6</sub>                 |
| RbSb                                             | 1.3  | K1.3  | K1.3RbSb                                             |
| RbV(PO <sub>4</sub> ) <sub>2</sub>               | 1.58 | K1.58 | K1.58RbV(PO <sub>4</sub> ) <sub>2</sub>              |
| RbVPO <sub>5</sub>                               | 1.06 | K1.06 | K1.06RbVPO <sub>5</sub>                              |
| ReO <sub>3</sub>                                 | 0.83 | K0.83 | K0.83ReO <sub>3</sub>                                |
| Sb                                               | 0.32 | K0.32 | K0.32Sb                                              |
| Sb(PO <sub>3</sub> ) <sub>4</sub>                | 1.47 | K1.47 | K1.47Sb(PO <sub>3</sub> ) <sub>4</sub>               |
| Sb(SO <sub>4</sub> ) <sub>2</sub>                | 1.07 | K1.07 | K1.07Sb(SO <sub>4</sub> ) <sub>2</sub>               |
| Sb <sub>11</sub> S <sub>18</sub>                 | 3.92 | K3.92 | K3.92Sb <sub>11</sub> S <sub>18</sub>                |
| Sb <sub>17</sub> S <sub>27</sub>                 | 3.41 | K3.41 | K3.41Sb <sub>17</sub> S <sub>27</sub>                |
| Sb <sub>2</sub> (PO <sub>4</sub> ) <sub>3</sub>  | 1.83 | K1.83 | K1.83Sb <sub>2</sub> (PO <sub>4</sub> ) <sub>3</sub> |
| Sb <sub>2</sub> P <sub>5</sub> O <sub>16</sub>   | 2.07 | K2.07 | K2.07Sb <sub>2</sub> P <sub>5</sub> O <sub>16</sub>  |
| SbN <sub>3</sub> (O <sub>3</sub> F) <sub>3</sub> | 1.6  | K1.6  | K1.6SbN <sub>3</sub> (O <sub>3</sub> F) <sub>3</sub> |
| SbO <sub>3</sub>                                 | 0.8  | K0.8  | K0.8SbO <sub>3</sub>                                 |
| SbP(OF <sub>3</sub> ) <sub>2</sub>               | 1.63 | K1.63 | K1.63SbP(OF <sub>3</sub> ) <sub>2</sub>              |
| SbP <sub>2</sub> O <sub>7</sub>                  | 0.94 | K0.94 | K0.94SbP <sub>2</sub> O <sub>7</sub>                 |
| SbPHO <sub>5</sub>                               | 1.07 | K1.07 | K1.07SbPHO <sub>5</sub>                              |
| SbPO <sub>5</sub>                                | 1.11 | K1.11 | K1.11SbPO <sub>5</sub>                               |
| SbSO <sub>4</sub> F <sub>3</sub>                 | 1.39 | K1.39 | K1.39SbSO <sub>4</sub> F <sub>3</sub>                |
| SbWO <sub>7</sub>                                | 1.28 | K1.28 | K1.28SbWO <sub>7</sub>                               |
| ScSn                                             | 0.84 | K0.84 | K0.84ScSn                                            |
| Si <sub>6</sub> BiO <sub>14</sub>                | 1.06 | K1.06 | K1.06Si <sub>6</sub> BiO <sub>14</sub>               |
| SiBi <sub>3</sub> O <sub>7</sub>                 | 1.2  | K1.2  | K1.2SiBi <sub>3</sub> O <sub>7</sub>                 |

|                                                       |      |       |                                                            |
|-------------------------------------------------------|------|-------|------------------------------------------------------------|
| Sn                                                    | 0.2  | K0.2  | K0.2Sn                                                     |
| Sn(PO <sub>3</sub> ) <sub>3</sub>                     | 1.48 | K1.48 | K1.48Sn(PO <sub>3</sub> ) <sub>3</sub>                     |
| Sn(SO <sub>4</sub> ) <sub>2</sub>                     | 1.22 | K1.22 | K1.22Sn(SO <sub>4</sub> ) <sub>2</sub>                     |
| Sn <sub>2</sub> (PO <sub>3</sub> ) <sub>5</sub>       | 2.24 | K2.24 | K2.24Sn <sub>2</sub> (PO <sub>3</sub> ) <sub>5</sub>       |
| Sn <sub>2</sub> (SO <sub>4</sub> ) <sub>3</sub>       | 1.89 | K1.89 | K1.89Sn <sub>2</sub> (SO <sub>4</sub> ) <sub>3</sub>       |
| Sn <sub>4</sub> (PO <sub>4</sub> ) <sub>3</sub>       | 1.76 | K1.76 | K1.76Sn <sub>4</sub> (PO <sub>4</sub> ) <sub>3</sub>       |
| Sn <sub>6</sub> P <sub>7</sub> O <sub>24</sub>        | 2.33 | K2.33 | K2.33Sn <sub>6</sub> P <sub>7</sub> O <sub>24</sub>        |
| SnO <sub>2</sub>                                      | 0.87 | K0.87 | K0.87SnO <sub>2</sub>                                      |
| SnP <sub>2</sub> O <sub>7</sub>                       | 1.49 | K1.49 | K1.49SnP <sub>2</sub> O <sub>7</sub>                       |
| SnPHO <sub>5</sub>                                    | 1.23 | K1.23 | K1.23SnPHO <sub>5</sub>                                    |
| SnPO <sub>4</sub>                                     | 0.92 | K0.92 | K0.92SnPO <sub>4</sub>                                     |
| SnS <sub>2</sub>                                      | 0.88 | K0.88 | K0.88SnS <sub>2</sub>                                      |
| Sr <sub>2</sub> LiNb <sub>3</sub> O <sub>10</sub>     | 3    | K3    | K3Sr <sub>2</sub> LiNb <sub>3</sub> O <sub>10</sub>        |
| Sr <sub>3</sub> Nb <sub>4</sub> O <sub>13</sub>       | 1.96 | K1.96 | K1.96Sr <sub>3</sub> Nb <sub>4</sub> O <sub>13</sub>       |
| SrLa <sub>3</sub> MnO <sub>8</sub>                    | 1.92 | K1.92 | K1.92SrLa <sub>3</sub> MnO <sub>8</sub>                    |
| SrLiLa <sub>15</sub> (CoO <sub>8</sub> ) <sub>4</sub> | 4.71 | K4.71 | K4.71SrLiLa <sub>15</sub> (CoO <sub>8</sub> ) <sub>4</sub> |
| Ta <sub>2</sub> CuO <sub>6</sub>                      | 1.77 | K1.77 | K1.77Ta <sub>2</sub> CuO <sub>6</sub>                      |
| TaWO <sub>7</sub>                                     | 1.41 | K1.41 | K1.41TaWO <sub>7</sub>                                     |
| TbSn <sub>2</sub>                                     | 0.99 | K0.99 | K0.99TbSn <sub>2</sub>                                     |
| Ti(CoO <sub>3</sub> ) <sub>2</sub>                    | 2.5  | K2.5  | K2.5Ti(CoO <sub>3</sub> ) <sub>2</sub>                     |
| Ti(PO <sub>3</sub> ) <sub>4</sub>                     | 1.71 | K1.71 | K1.71Ti(PO <sub>3</sub> ) <sub>4</sub>                     |
| Ti(SiO <sub>3</sub> ) <sub>2</sub>                    | 1.43 | K1.43 | K1.43Ti(SiO <sub>3</sub> ) <sub>2</sub>                    |
| Ti(SO <sub>4</sub> ) <sub>2</sub>                     | 1.1  | K1.1  | K1.1Ti(SO <sub>4</sub> ) <sub>2</sub>                      |
| Ti <sub>12</sub> Fe <sub>5</sub> O <sub>32</sub>      | 2.66 | K2.66 | K2.66Ti <sub>12</sub> Fe <sub>5</sub> O <sub>32</sub>      |



|               |      |       |                    |
|---------------|------|-------|--------------------|
| Ti13O22       | 1.76 | K1.76 | K1.76Ti13O22       |
| Ti16CuS32     | 1.19 | K1.19 | K1.19Ti16CuS32     |
| Ti2(PO4)3     | 1.84 | K1.84 | K1.84Ti2(PO4)3     |
| Ti2Mn3Co3O16  | 6.2  | K6.2  | K6.2Ti2Mn3Co3O16   |
| Ti2Mn3Fe3O16  | 6.23 | K6.23 | K6.23Ti2Mn3Fe3O16  |
| Ti2Ni(PO5)2   | 2.55 | K2.55 | K2.55Ti2Ni(PO5)2   |
| Ti2P2O9       | 1.55 | K1.55 | K1.55Ti2P2O9       |
| Ti3Co3(SbO8)2 | 5.79 | K5.79 | K5.79Ti3Co3(SbO8)2 |
| Ti3Co3(TeO8)2 | 5.67 | K5.67 | K5.67Ti3Co3(TeO8)2 |
| Ti3Cr(PO4)6   | 3.62 | K3.62 | K3.62Ti3Cr(PO4)6   |
| Ti3Cr3(SbO8)2 | 4.32 | K4.32 | K4.32Ti3Cr3(SbO8)2 |
| Ti3Cu3(TeO8)2 | 4.88 | K4.88 | K4.88Ti3Cu3(TeO8)2 |
| Ti3Fe(PO4)6   | 3.43 | K3.43 | K3.43Ti3Fe(PO4)6   |
| Ti3Fe3(SbO8)2 | 5.78 | K5.78 | K5.78Ti3Fe3(SbO8)2 |
| Ti3Mn3(SbO8)2 | 4.92 | K4.92 | K4.92Ti3Mn3(SbO8)2 |
| Ti3Mn3(SnO8)2 | 6.27 | K6.27 | K6.27Ti3Mn3(SnO8)2 |
| Ti3Mn3(TeO8)2 | 6.38 | K6.38 | K6.38Ti3Mn3(TeO8)2 |
| Ti3Mn3Cr2O16  | 5.76 | K5.76 | K5.76Ti3Mn3Cr2O16  |
| Ti3Mn5O16     | 4.73 | K4.73 | K4.73Ti3Mn5O16     |
| Ti3MnO8       | 1.99 | K1.99 | K1.99Ti3MnO8       |
| Ti3Nb(CuO4)3  | 2.77 | K2.77 | K2.77Ti3Nb(CuO4)3  |
| Ti3Nb2Cr3O16  | 4.13 | K4.13 | K4.13Ti3Nb2Cr3O16  |
| Ti3Nb2V3O16   | 3.98 | K3.98 | K3.98Ti3Nb2V3O16   |
| Ti3NbO8       | 1.85 | K1.85 | K1.85Ti3NbO8       |

|                                                                   |      |       |                                                                        |
|-------------------------------------------------------------------|------|-------|------------------------------------------------------------------------|
| Ti <sub>3</sub> Ni <sub>3</sub> (TeO <sub>8</sub> ) <sub>2</sub>  | 5.82 | K5.82 | K5.82Ti <sub>3</sub> Ni <sub>3</sub> (TeO <sub>8</sub> ) <sub>2</sub>  |
| Ti <sub>3</sub> O <sub>4</sub>                                    | 1.07 | K1.07 | K1.07Ti <sub>3</sub> O <sub>4</sub>                                    |
| Ti <sub>3</sub> P <sub>3</sub> O <sub>13</sub>                    | 2.24 | K2.24 | K2.24Ti <sub>3</sub> P <sub>3</sub> O <sub>13</sub>                    |
| Ti <sub>3</sub> Se <sub>4</sub>                                   | 1.16 | K1.16 | K1.16Ti <sub>3</sub> Se <sub>4</sub>                                   |
| Ti <sub>3</sub> V <sub>5</sub> O <sub>16</sub>                    | 4.53 | K4.53 | K4.53Ti <sub>3</sub> V <sub>5</sub> O <sub>16</sub>                    |
| Ti <sub>3</sub> VO <sub>8</sub>                                   | 1.82 | K1.82 | K1.82Ti <sub>3</sub> VO <sub>8</sub>                                   |
| Ti <sub>3</sub> Zn <sub>2</sub> O <sub>8</sub>                    | 1.31 | K1.31 | K1.31Ti <sub>3</sub> Zn <sub>2</sub> O <sub>8</sub>                    |
| Ti <sub>4</sub> (CuO <sub>4</sub> ) <sub>3</sub>                  | 2.74 | K2.74 | K2.74Ti <sub>4</sub> (CuO <sub>4</sub> ) <sub>3</sub>                  |
| Ti <sub>4</sub> Mn(PO <sub>4</sub> ) <sub>6</sub>                 | 3.97 | K3.97 | K3.97Ti <sub>4</sub> Mn(PO <sub>4</sub> ) <sub>6</sub>                 |
| Ti <sub>4</sub> VO <sub>8</sub>                                   | 2.74 | K2.74 | K2.74Ti <sub>4</sub> VO <sub>8</sub>                                   |
| Ti <sub>5</sub> Mn <sub>3</sub> O <sub>16</sub>                   | 5.8  | K5.8  | K5.8Ti <sub>5</sub> Mn <sub>3</sub> O <sub>16</sub>                    |
| Ti <sub>6</sub> Co <sub>3</sub> O <sub>16</sub>                   | 2.66 | K2.66 | K2.66Ti <sub>6</sub> Co <sub>3</sub> O <sub>16</sub>                   |
| Ti <sub>8</sub> O <sub>13</sub>                                   | 3.14 | K3.14 | K3.14Ti <sub>8</sub> O <sub>13</sub>                                   |
| TiAgF <sub>6</sub>                                                | 1.71 | K1.71 | K1.71TiAgF <sub>6</sub>                                                |
| TiCo <sub>3</sub> O <sub>8</sub>                                  | 2.98 | K2.98 | K2.98TiCo <sub>3</sub> O <sub>8</sub>                                  |
| TiCo <sub>5</sub> O <sub>12</sub>                                 | 3.06 | K3.06 | K3.06TiCo <sub>5</sub> O <sub>12</sub>                                 |
| TiCr <sub>2</sub> Ni <sub>3</sub> (PO <sub>4</sub> ) <sub>6</sub> | 5.1  | K5.1  | K5.1TiCr <sub>2</sub> Ni <sub>3</sub> (PO <sub>4</sub> ) <sub>6</sub>  |
| TiCr <sub>3</sub> (PO <sub>4</sub> ) <sub>6</sub>                 | 3.47 | K3.47 | K3.47TiCr <sub>3</sub> (PO <sub>4</sub> ) <sub>6</sub>                 |
| TiCrO <sub>4</sub>                                                | 1.5  | K1.5  | K1.5TiCrO <sub>4</sub>                                                 |
| TiCu <sub>3</sub> (PO <sub>4</sub> ) <sub>4</sub>                 | 3.52 | K3.52 | K3.52TiCu <sub>3</sub> (PO <sub>4</sub> ) <sub>4</sub>                 |
| TiCuF <sub>6</sub>                                                | 1.5  | K1.5  | K1.5TiCuF <sub>6</sub>                                                 |
| TiF <sub>3</sub>                                                  | 0.77 | K0.77 | K0.77TiF <sub>3</sub>                                                  |
| TiFe <sub>2</sub> Ni <sub>3</sub> (PO <sub>4</sub> ) <sub>6</sub> | 5.02 | K5.02 | K5.02TiFe <sub>2</sub> Ni <sub>3</sub> (PO <sub>4</sub> ) <sub>6</sub> |
| TiFe <sub>3</sub> (PO <sub>4</sub> ) <sub>6</sub>                 | 3.66 | K3.66 | K3.66TiFe <sub>3</sub> (PO <sub>4</sub> ) <sub>6</sub>                 |

|                                                                   |      |       |                                                                        |
|-------------------------------------------------------------------|------|-------|------------------------------------------------------------------------|
| TiFe <sub>3</sub> Cu <sub>2</sub> (PO <sub>4</sub> ) <sub>6</sub> | 4.79 | K4.79 | K4.79TiFe <sub>3</sub> Cu <sub>2</sub> (PO <sub>4</sub> ) <sub>6</sub> |
| TiFeO <sub>4</sub>                                                | 1.39 | K1.39 | K1.39TiFeO <sub>4</sub>                                                |
| TiMn <sub>2</sub> O <sub>6</sub>                                  | 2.6  | K2.6  | K2.6TiMn <sub>2</sub> O <sub>6</sub>                                   |
| TiMn <sub>3</sub> (PO <sub>4</sub> ) <sub>6</sub>                 | 3.99 | K3.99 | K3.99TiMn <sub>3</sub> (PO <sub>4</sub> ) <sub>6</sub>                 |
| TiMn <sub>3</sub> Cr <sub>2</sub> (PO <sub>4</sub> ) <sub>6</sub> | 4.85 | K4.85 | K4.85TiMn <sub>3</sub> Cr <sub>2</sub> (PO <sub>4</sub> ) <sub>6</sub> |
| TiMn <sub>3</sub> O <sub>8</sub>                                  | 1.78 | K1.78 | K1.78TiMn <sub>3</sub> O <sub>8</sub>                                  |
| TiMn <sub>5</sub> O <sub>12</sub>                                 | 3.71 | K3.71 | K3.71TiMn <sub>5</sub> O <sub>12</sub>                                 |
| TiMn <sub>9</sub> O <sub>20</sub>                                 | 5.87 | K5.87 | K5.87TiMn <sub>9</sub> O <sub>20</sub>                                 |
| TiMnO <sub>4</sub>                                                | 1.52 | K1.52 | K1.52TiMnO <sub>4</sub>                                                |
| TiNCl                                                             | 0.73 | K0.73 | K0.73TiNCl                                                             |
| TiO <sub>2</sub>                                                  | 0.44 | K0.44 | K0.44TiO <sub>2</sub>                                                  |
| TiP <sub>2</sub> O <sub>7</sub>                                   | 1.23 | K1.23 | K1.23TiP <sub>2</sub> O <sub>7</sub>                                   |
| TiPO <sub>4</sub>                                                 | 1.01 | K1.01 | K1.01TiPO <sub>4</sub>                                                 |
| TiPO <sub>4</sub> F                                               | 1.4  | K1.4  | K1.4TiPO <sub>4</sub> F                                                |
| TiS <sub>2</sub>                                                  | 0.85 | K0.85 | K0.85TiS <sub>2</sub>                                                  |
| TiSe <sub>2</sub>                                                 | 1.01 | K1.01 | K1.01TiSe <sub>2</sub>                                                 |
| TiSiO <sub>4</sub>                                                | 0.92 | K0.92 | K0.92TiSiO <sub>4</sub>                                                |
| TiTe <sub>2</sub>                                                 | 1.11 | K1.11 | K1.11TiTe <sub>2</sub>                                                 |
| TiV <sub>3</sub> O <sub>8</sub>                                   | 1.79 | K1.79 | K1.79TiV <sub>3</sub> O <sub>8</sub>                                   |
| TiVO <sub>4</sub>                                                 | 1.25 | K1.25 | K1.25TiVO <sub>4</sub>                                                 |
| Ti <sub>2</sub> CrF <sub>6</sub>                                  | 1.79 | K1.79 | K1.79Ti <sub>2</sub> CrF <sub>6</sub>                                  |
| V(CO <sub>3</sub> ) <sub>2</sub>                                  | 1.25 | K1.25 | K1.25V(CO <sub>3</sub> ) <sub>2</sub>                                  |
| V(NF <sub>3</sub> ) <sub>2</sub>                                  | 1.21 | K1.21 | K1.21V(NF <sub>3</sub> ) <sub>2</sub>                                  |
| V(PO <sub>3</sub> ) <sub>3</sub>                                  | 1.72 | K1.72 | K1.72V(PO <sub>3</sub> ) <sub>3</sub>                                  |

|                                                                |      |       |                                                                     |
|----------------------------------------------------------------|------|-------|---------------------------------------------------------------------|
| V(PO <sub>3</sub> ) <sub>4</sub>                               | 2.89 | K2.89 | K2.89V(PO <sub>3</sub> ) <sub>4</sub>                               |
| V(SiO <sub>3</sub> ) <sub>2</sub>                              | 1.23 | K1.23 | K1.23V(SiO <sub>3</sub> ) <sub>2</sub>                              |
| V(SO <sub>4</sub> ) <sub>2</sub>                               | 1.19 | K1.19 | K1.19V(SO <sub>4</sub> ) <sub>2</sub>                               |
| V <sub>12</sub> O <sub>29</sub>                                | 2.99 | K2.99 | K2.99V <sub>12</sub> O <sub>29</sub>                                |
| V <sub>2</sub> (OF) <sub>3</sub>                               | 0.95 | K0.95 | K0.95V <sub>2</sub> (OF) <sub>3</sub>                               |
| V <sub>2</sub> (PO <sub>4</sub> ) <sub>3</sub>                 | 1.7  | K1.7  | K1.7V <sub>2</sub> (PO <sub>4</sub> ) <sub>3</sub>                  |
| V <sub>2</sub> (SO <sub>4</sub> ) <sub>3</sub>                 | 1.84 | K1.84 | K1.84V <sub>2</sub> (SO <sub>4</sub> ) <sub>3</sub>                 |
| V <sub>2</sub> CoO <sub>6</sub>                                | 1.11 | K1.11 | K1.11V <sub>2</sub> CoO <sub>6</sub>                                |
| V <sub>2</sub> Cr(PO <sub>4</sub> ) <sub>3</sub>               | 1.78 | K1.78 | K1.78V <sub>2</sub> Cr(PO <sub>4</sub> ) <sub>3</sub>               |
| V <sub>2</sub> Cr <sub>3</sub> Sb <sub>3</sub> O <sub>16</sub> | 5.31 | K5.31 | K5.31V <sub>2</sub> Cr <sub>3</sub> Sb <sub>3</sub> O <sub>16</sub> |
| V <sub>2</sub> Cu(PO <sub>4</sub> ) <sub>3</sub>               | 1.91 | K1.91 | K1.91V <sub>2</sub> Cu(PO <sub>4</sub> ) <sub>3</sub>               |
| V <sub>2</sub> F <sub>7</sub>                                  | 1.34 | K1.34 | K1.34V <sub>2</sub> F <sub>7</sub>                                  |
| V <sub>2</sub> NiO <sub>6</sub>                                | 1.33 | K1.33 | K1.33V <sub>2</sub> NiO <sub>6</sub>                                |
| V <sub>2</sub> O <sub>2</sub> F <sub>3</sub>                   | 1.08 | K1.08 | K1.08V <sub>2</sub> O <sub>2</sub> F <sub>3</sub>                   |
| V <sub>2</sub> O <sub>3</sub> F                                | 0.91 | K0.91 | K0.91V <sub>2</sub> O <sub>3</sub> F                                |
| V <sub>2</sub> O <sub>5</sub>                                  | 1.09 | K1.09 | K1.09V <sub>2</sub> O <sub>5</sub>                                  |
| V <sub>2</sub> OF <sub>5</sub>                                 | 0.87 | K0.87 | K0.87V <sub>2</sub> OF <sub>5</sub>                                 |
| V <sub>2</sub> OF <sub>6</sub>                                 | 1.24 | K1.24 | K1.24V <sub>2</sub> OF <sub>6</sub>                                 |
| V <sub>2</sub> OF <sub>7</sub>                                 | 1.49 | K1.49 | K1.49V <sub>2</sub> OF <sub>7</sub>                                 |
| V <sub>2</sub> P <sub>2</sub> O <sub>9</sub>                   | 1.65 | K1.65 | K1.65V <sub>2</sub> P <sub>2</sub> O <sub>9</sub>                   |
| V <sub>2</sub> P <sub>4</sub> H <sub>3</sub> O <sub>16</sub>   | 3.84 | K3.84 | K3.84V <sub>2</sub> P <sub>4</sub> H <sub>3</sub> O <sub>16</sub>   |
| V <sub>2</sub> Si <sub>4</sub> O <sub>11</sub>                 | 1.96 | K1.96 | K1.96V <sub>2</sub> Si <sub>4</sub> O <sub>11</sub>                 |
| V <sub>2</sub> Sn(PO <sub>4</sub> ) <sub>3</sub>               | 1.94 | K1.94 | K1.94V <sub>2</sub> Sn(PO <sub>4</sub> ) <sub>3</sub>               |
| V <sub>3</sub> (O <sub>2</sub> F) <sub>2</sub>                 | 1.24 | K1.24 | K1.24V <sub>3</sub> (O <sub>2</sub> F) <sub>2</sub>                 |

|                                                                 |      |       |                                                                      |
|-----------------------------------------------------------------|------|-------|----------------------------------------------------------------------|
| V <sub>3</sub> (OF) <sub>4</sub>                                | 1.47 | K1.47 | K1.47V <sub>3</sub> (OF) <sub>4</sub>                                |
| V <sub>3</sub> (OF <sub>3</sub> ) <sub>2</sub>                  | 1.54 | K1.54 | K1.54V <sub>3</sub> (OF <sub>3</sub> ) <sub>2</sub>                  |
| V <sub>3</sub> (P <sub>2</sub> O <sub>7</sub> ) <sub>2</sub>    | 2.63 | K2.63 | K2.63V <sub>3</sub> (P <sub>2</sub> O <sub>7</sub> ) <sub>2</sub>    |
| V <sub>3</sub> (PO <sub>4</sub> ) <sub>4</sub>                  | 2.87 | K2.87 | K2.87V <sub>3</sub> (PO <sub>4</sub> ) <sub>4</sub>                  |
| V <sub>3</sub> Bi <sub>2</sub> (PO <sub>4</sub> ) <sub>6</sub>  | 3.36 | K3.36 | K3.36V <sub>3</sub> Bi <sub>2</sub> (PO <sub>4</sub> ) <sub>6</sub>  |
| V <sub>3</sub> Co(PO <sub>4</sub> ) <sub>4</sub>                | 3.47 | K3.47 | K3.47V <sub>3</sub> Co(PO <sub>4</sub> ) <sub>4</sub>                |
| V <sub>3</sub> Co <sub>3</sub> (TeO <sub>8</sub> ) <sub>2</sub> | 4.29 | K4.29 | K4.29V <sub>3</sub> Co <sub>3</sub> (TeO <sub>8</sub> ) <sub>2</sub> |
| V <sub>3</sub> CoO <sub>8</sub>                                 | 1.01 | K1.01 | K1.01V <sub>3</sub> CoO <sub>8</sub>                                 |
| V <sub>3</sub> Cr(PO <sub>4</sub> ) <sub>6</sub>                | 3.34 | K3.34 | K3.34V <sub>3</sub> Cr(PO <sub>4</sub> ) <sub>6</sub>                |
| V <sub>3</sub> Cr <sub>3</sub> (SbO <sub>8</sub> ) <sub>2</sub> | 4.28 | K4.28 | K4.28V <sub>3</sub> Cr <sub>3</sub> (SbO <sub>8</sub> ) <sub>2</sub> |
| V <sub>3</sub> Cr <sub>3</sub> (TeO <sub>8</sub> ) <sub>2</sub> | 4.45 | K4.45 | K4.45V <sub>3</sub> Cr <sub>3</sub> (TeO <sub>8</sub> ) <sub>2</sub> |
| V <sub>3</sub> Cr <sub>3</sub> (WO <sub>8</sub> ) <sub>2</sub>  | 3.39 | K3.39 | K3.39V <sub>3</sub> Cr <sub>3</sub> (WO <sub>8</sub> ) <sub>2</sub>  |
| V <sub>3</sub> CrO <sub>8</sub>                                 | 2.35 | K2.35 | K2.35V <sub>3</sub> CrO <sub>8</sub>                                 |
| V <sub>3</sub> Cu(PO <sub>4</sub> ) <sub>4</sub>                | 2.76 | K2.76 | K2.76V <sub>3</sub> Cu(PO <sub>4</sub> ) <sub>4</sub>                |
| V <sub>3</sub> Cu(PO <sub>4</sub> ) <sub>6</sub>                | 3.28 | K3.28 | K3.28V <sub>3</sub> Cu(PO <sub>4</sub> ) <sub>6</sub>                |
| V <sub>3</sub> CuO <sub>8</sub>                                 | 1.3  | K1.3  | K1.3V <sub>3</sub> CuO <sub>8</sub>                                  |
| V <sub>3</sub> Fe(PO <sub>4</sub> ) <sub>6</sub>                | 3.11 | K3.11 | K3.11V <sub>3</sub> Fe(PO <sub>4</sub> ) <sub>6</sub>                |
| V <sub>3</sub> Fe <sub>2</sub> CuO <sub>12</sub>                | 2.77 | K2.77 | K2.77V <sub>3</sub> Fe <sub>2</sub> CuO <sub>12</sub>                |
| V <sub>3</sub> Fe <sub>2</sub> CuO <sub>12</sub>                | 2.77 | K2.77 | K2.77V <sub>3</sub> Fe <sub>2</sub> CuO <sub>12</sub>                |
| V <sub>3</sub> Fe <sub>3</sub> (TeO <sub>8</sub> ) <sub>2</sub> | 5.44 | K5.44 | K5.44V <sub>3</sub> Fe <sub>3</sub> (TeO <sub>8</sub> ) <sub>2</sub> |
| V <sub>3</sub> FeO <sub>8</sub>                                 | 1.56 | K1.56 | K1.56V <sub>3</sub> FeO <sub>8</sub>                                 |
| V <sub>3</sub> Ni(PO <sub>4</sub> ) <sub>4</sub>                | 3.48 | K3.48 | K3.48V <sub>3</sub> Ni(PO <sub>4</sub> ) <sub>4</sub>                |
| V <sub>3</sub> Ni(PO <sub>4</sub> ) <sub>6</sub>                | 3.07 | K3.07 | K3.07V <sub>3</sub> Ni(PO <sub>4</sub> ) <sub>6</sub>                |
| V <sub>3</sub> NiO <sub>8</sub>                                 | 2.33 | K2.33 | K2.33V <sub>3</sub> NiO <sub>8</sub>                                 |

|            |      |       |                |
|------------|------|-------|----------------|
| V3O5F      | 1.22 | K1.22 | K1.22V3O5F     |
| V3O7       | 0.77 | K0.77 | K0.77V3O7      |
| V3OF11     | 1.74 | K1.74 | K1.74V3OF11    |
| V3P3O13    | 2.59 | K2.59 | K2.59V3P3O13   |
| V3P6WO24   | 2.74 | K2.74 | K2.74V3P6WO24  |
| V3S4       | 0.76 | K0.76 | K0.76V3S4      |
| V3Si3O10   | 2.02 | K2.02 | K2.02V3Si3O10  |
| V3Zn2O8    | 1.5  | K1.5  | K1.5V3Zn2O8    |
| V4(CuO4)3  | 2.46 | K2.46 | K2.46V4(CuO4)3 |
| V4(OF3)3   | 1.75 | K1.75 | K1.75V4(OF3)3  |
| V4(PO4)3   | 1.8  | K1.8  | K1.8V4(PO4)3   |
| V4CrCuO12  | 2.82 | K2.82 | K2.82V4CrCuO12 |
| V4CuNiO12  | 2.82 | K2.82 | K2.82V4CuNiO12 |
| V4FeO12    | 2.72 | K2.72 | K2.72V4FeO12   |
| V4O5F7     | 1.96 | K1.96 | K1.96V4O5F7    |
| V4O7F5     | 1.6  | K1.6  | K1.6V4O7F5     |
| V4OF11     | 1.71 | K1.71 | K1.71V4OF11    |
| V4Si4O13   | 2.69 | K2.69 | K2.69V4Si4O13  |
| V5(BO5)2   | 2.18 | K2.18 | K2.18V5(BO5)2  |
| V5(P3O11)2 | 3.4  | K3.4  | K3.4V5(P3O11)2 |
| V5CoO12    | 2.74 | K2.74 | K2.74V5CoO12   |
| V5CuO12    | 2.68 | K2.68 | K2.68V5CuO12   |
| V5F11      | 1.78 | K1.78 | K1.78V5F11     |
| V5O12      | 2.01 | K2.01 | K2.01V5O12     |

|                                                                  |      |       |                                                                       |
|------------------------------------------------------------------|------|-------|-----------------------------------------------------------------------|
| V6F13                                                            | 2.19 | K2.19 | K2.19V6F13                                                            |
| V6O11                                                            | 1.95 | K1.95 | K1.95V6O11                                                            |
| V6O13                                                            | 2.53 | K2.53 | K2.53V6O13                                                            |
| V6O5F19                                                          | 2.56 | K2.56 | K2.56V6O5F19                                                          |
| V6O7F5                                                           | 1.98 | K1.98 | K1.98V6O7F5                                                           |
| V9O22                                                            | 2.55 | K2.55 | K2.55V9O22                                                            |
| VBO4                                                             | 0.88 | K0.88 | K0.88VBO4                                                             |
| VCo <sub>3</sub> (PO <sub>4</sub> ) <sub>4</sub>                 | 3.71 | K3.71 | K3.71VCo <sub>3</sub> (PO <sub>4</sub> ) <sub>4</sub>                 |
| VCoO <sub>4</sub>                                                | 1.09 | K1.09 | K1.09VCoO <sub>4</sub>                                                |
| VCr(P <sub>2</sub> O <sub>7</sub> ) <sub>2</sub>                 | 2.65 | K2.65 | K2.65VCr(P <sub>2</sub> O <sub>7</sub> ) <sub>2</sub>                 |
| VCr <sub>2</sub> Ni <sub>3</sub> (PO <sub>4</sub> ) <sub>6</sub> | 4.49 | K4.49 | K4.49VCr <sub>2</sub> Ni <sub>3</sub> (PO <sub>4</sub> ) <sub>6</sub> |
| VCrO <sub>4</sub>                                                | 0.97 | K0.97 | K0.97VCrO <sub>4</sub>                                                |
| VCrP <sub>2</sub> (HO <sub>5</sub> ) <sub>2</sub>                | 2.64 | K2.64 | K2.64VCrP <sub>2</sub> (HO <sub>5</sub> ) <sub>2</sub>                |
| VCrP <sub>2</sub> (O <sub>4</sub> F) <sub>2</sub>                | 2.75 | K2.75 | K2.75VCrP <sub>2</sub> (O <sub>4</sub> F) <sub>2</sub>                |
| VF <sub>3</sub>                                                  | 0.59 | K0.59 | K0.59VF <sub>3</sub>                                                  |
| VF <sub>4</sub>                                                  | 0.81 | K0.81 | K0.81VF <sub>4</sub>                                                  |
| VF <sub>5</sub>                                                  | 0.93 | K0.93 | K0.93VF <sub>5</sub>                                                  |
| VFe(P <sub>2</sub> O <sub>7</sub> ) <sub>2</sub>                 | 2.56 | K2.56 | K2.56VFe(P <sub>2</sub> O <sub>7</sub> ) <sub>2</sub>                 |
| VFe(PO <sub>4</sub> ) <sub>2</sub>                               | 2.17 | K2.17 | K2.17VFe(PO <sub>4</sub> ) <sub>2</sub>                               |
| VFe <sub>3</sub> (PO <sub>4</sub> ) <sub>4</sub>                 | 3.59 | K3.59 | K3.59VFe <sub>3</sub> (PO <sub>4</sub> ) <sub>4</sub>                 |
| VFe <sub>3</sub> (PO <sub>4</sub> ) <sub>6</sub>                 | 3.18 | K3.18 | K3.18VFe <sub>3</sub> (PO <sub>4</sub> ) <sub>6</sub>                 |
| VFeO <sub>4</sub>                                                | 1.1  | K1.1  | K1.1VFeO <sub>4</sub>                                                 |
| VFeP <sub>2</sub> (HO <sub>5</sub> ) <sub>2</sub>                | 2.77 | K2.77 | K2.77VFeP <sub>2</sub> (HO <sub>5</sub> ) <sub>2</sub>                |
| VFeP <sub>2</sub> (O <sub>4</sub> F) <sub>2</sub>                | 2.52 | K2.52 | K2.52VFeP <sub>2</sub> (O <sub>4</sub> F) <sub>2</sub>                |

|             |      |       |                 |
|-------------|------|-------|-----------------|
| VNi(PO4)2   | 1.62 | K1.62 | K1.62VNi(PO4)2  |
| VO2         | 0.34 | K0.34 | K0.34VO2        |
| VO2F        | 0.58 | K0.58 | K0.58VO2F       |
| VOF3        | 0.79 | K0.79 | K0.79VOF3       |
| VP2O7       | 1.52 | K1.52 | K1.52VP2O7      |
| VPHO5       | 1.38 | K1.38 | K1.38VPHO5      |
| VPO4        | 1.02 | K1.02 | K1.02VPO4       |
| VPO5        | 0.95 | K0.95 | K0.95VPO5       |
| VS2         | 0.76 | K0.76 | K0.76VS2        |
| VSe2        | 1.01 | K1.01 | K1.01VSe2       |
| VSn(PO4)2   | 1.91 | K1.91 | K1.91VSn(PO4)2  |
| W3Br7       | 1.64 | K1.64 | K1.64W3Br7      |
| WCl6        | 1.51 | K1.51 | K1.51WCl6       |
| WF6         | 0.83 | K0.83 | K0.83WF6        |
| WO2         | 0.75 | K0.75 | K0.75WO2        |
| WO3         | 0.67 | K0.67 | K0.67WO3        |
| Y2Ti2S2O5   | 1.41 | K1.41 | K1.41Y2Ti2S2O5  |
| YSb2        | 2.12 | K2.12 | K2.12YSb2       |
| ZnCr3(SO4)6 | 3.5  | K3.5  | K3.5ZnCr3(SO4)6 |
| ZnFe(PO4)2  | 2.24 | K2.24 | K2.24ZnFe(PO4)2 |
| Zr6Cl14     | 2.58 | K2.58 | K2.58Zr6Cl14    |
| Zr6MnCl14   | 3.71 | K3.71 | K3.71Zr6MnCl14  |
